# Supplementary material for: Natural IgG Autoantibodies Are Abundant and Ubiquitous in Human Sera, and Their Number Is Influenced By Age, Gender, and Disease
Source: PLoS One. 2013 Apr 2;8(4):e60726. doi: 10.1371/journal.pone.0060726 (PMC3617628; doi:10.1371/journal.pone.0060726)
Supplement: Table S1 — Positive autoantibody lists determined by different selection criteria. (XLSX) [file pone.0060726.s001.xlsx]

## Sheet: Criteria
Criteria	Number of autoantibodies	Reference
Z factor ≥ 0.4 in over 60% control samples	826	Supplemental Table 1A
Z factor ≥ 0.4 in over 60% control samples & Average RFU > 3000	408	Supplemental Table 1B
Z factor ≥ 0.4 in over 60% control samples & Average RFU > 5000	135	Supplemental Table 1C
Z factor ≥ 0.4 in over 60% samples from each of the control, AD, Breast Cancer and Multiple Sclerosis groups & Average RFU > 5000	66	Supplemental Table 1D

## Sheet: Supplemental Table 1A
Database ID	Ultimate ORF ID	Description	Average RFU	Percent Positive	Total hits	File1 Hit	File2 Hit	File3 Hit	File4 Hit	File5 Hit	File6 Hit	File7 Hit	File8 Hit	File9 Hit	File10 Hit	File11 Hit	File12 Hit	File13 Hit	File14 Hit	File15 Hit	File16 Hit	File17 Hit	File18 Hit	File19 Hit	File20 Hit	File21 Hit	File22 Hit	File23 Hit	File24 Hit	File25 Hit	File26 Hit	File27 Hit	File28 Hit	File29 Hit	File30 Hit	File31 Hit	File32 Hit	File33 Hit	File34 Hit	File35 Hit	File36 Hit	File37 Hit	File38 Hit	File39 Hit	File40 Hit	File41 Hit	File42 Hit	File43 Hit	File44 Hit
NM_003141.2	IOH9948	tripartite motif-containing 21 (TRIM21)	62802.4	0.982456	56	1	1	1	1	1	1	1	1	1	1	1	1	1	1	1	1	1	1	1	1	1	1	0	1	1	1	1	1	1	1	1	1	1	1	1	1	1	1	1	1	1	1	1	1
BC030984.1	IOH23182	cDNA clone MGC:32654 IMAGE:4701898, complete cds	58491.9	0.982456	56	1	1	1	1	1	1	1	1	1	1	1	1	1	1	1	1	1	1	1	1	1	1	0	1	1	1	1	1	1	1	1	1	1	1	1	1	1	1	1	1	1	1	1	1
BC015833.1	IOH14840	cDNA clone MGC:27152 IMAGE:4691630, complete cds	57276.5	0.982456	56	1	1	1	1	1	1	1	1	1	1	1	1	1	1	1	1	1	1	1	1	1	1	0	1	1	1	1	1	1	1	1	1	1	1	1	1	1	1	1	1	1	1	1	1
PHR5001		Recombinant human CTLA-4/Fc	55636.4	0.982456	56	1	1	1	1	1	1	1	1	1	1	1	1	1	1	1	1	1	1	1	1	1	1	0	1	1	1	1	1	1	1	1	1	1	1	1	1	1	1	1	1	1	1	1	1
BC020233.1	IOH14752	cDNA clone MGC:31936 IMAGE:4765518, complete cds	54365.2	0.982456	56	1	1	1	1	1	1	1	1	1	1	1	1	1	1	1	1	1	1	1	1	1	1	0	1	1	1	1	1	1	1	1	1	1	1	1	1	1	1	1	1	1	1	1	1
BC016380.1	IOH23077	cDNA clone MGC:27376 IMAGE:4688477, complete cds	46863.7	0.982456	56	1	1	1	1	1	1	1	1	1	1	1	1	1	1	1	1	1	1	1	1	1	1	0	1	1	1	1	1	1	1	1	1	1	1	1	1	1	1	1	1	1	1	1	1
BC030813.1	IOH23055	cDNA clone MGC:22645 IMAGE:4700961, complete cds	44904.1	0.964912	55	1	1	1	1	1	1	1	1	1	1	1	1	1	1	1	1	1	1	1	1	1	1	0	1	1	1	1	1	1	1	1	1	1	1	1	1	1	1	1	1	1	1	1	1
NM_014481.2	IOH4887	APEX nuclease (apurinic/apyrimidinic endonuclease) 2 (APEX2), nuclear gene encoding mitochondrial protein	40442.3	0.947368	54	1	1	1	1	1	1	1	1	1	1	1	1	1	1	1	1	1	1	1	1	0	1	0	1	1	1	1	1	1	1	1	1	1	1	1	1	1	1	1	1	1	1	1	1
BC022362.1	IOH14191	cDNA clone MGC:23888 IMAGE:4704496, complete cds	30665.8	0.982456	56	1	1	1	1	1	1	1	1	1	1	1	1	1	1	1	1	1	1	1	1	1	1	0	1	1	1	1	1	1	1	1	1	1	1	1	1	1	1	1	1	1	1	1	1
NM_203284.1	IOH39978	recombination signal binding protein for immunoglobulin kappa J region (RBPJ), transcript variant 4	29880.2	0.964912	55	1	1	1	1	1	1	1	1	1	1	1	1	1	1	1	1	1	1	1	1	0	1	0	1	1	1	1	1	1	1	1	1	1	1	1	1	1	1	1	1	1	1	1	1
NM_024692.3	IOH42634	CAP-GLY domain containing linker protein family, member 4 (CLIP4)	26846.1	0.947368	54	1	1	1	1	1	1	1	1	1	1	1	1	1	1	1	1	1	1	1	0	0	1	0	1	1	1	1	1	1	1	1	1	1	1	1	1	1	1	1	1	1	1	1	1
BC018929.1	IOH22929	pleckstrin homology-like domain, family A, member 1 (PHLDA1)	21412.2	0.912281	52	0	1	1	1	1	1	1	1	1	1	1	1	1	1	1	1	0	1	1	1	0	1	0	1	1	1	1	1	1	1	1	1	1	1	0	1	1	1	1	1	1	1	1	1
BC032451.1	IOH21663	cDNA clone MGC:40426 IMAGE:5178085, complete cds	21277.8	0.964912	55	1	1	1	1	1	1	1	1	1	1	1	1	1	1	1	1	1	1	1	1	0	1	0	1	1	1	1	1	1	1	1	1	1	1	1	1	1	1	1	1	1	1	1	1
BC099907.1	IOH62625	General transcription factor II-I	18984.8	0.912281	52	1	0	1	1	1	1	1	1	1	1	1	1	1	1	1	1	0	1	1	0	0	1	0	1	1	1	1	1	1	1	1	1	1	1	1	1	1	1	1	1	1	1	1	1
NM_004987.3	IOH55033	LIM and senescent cell antigen-like-containing domain protein 1	18632.6	0.912281	52	1	1	1	1	1	1	1	1	1	1	1	1	1	1	1	1	0	1	1	0	0	1	0	1	1	1	1	1	1	1	1	1	1	1	0	1	1	1	1	1	1	1	1	1
BC031650.1	IOH22742	Putative E3 ubiquitin-protein ligase SH3RF2	17013.7	0.947368	54	1	1	1	1	1	1	1	1	1	1	1	1	1	1	1	1	0	1	1	1	0	1	0	1	1	1	1	1	1	1	1	1	1	1	1	1	1	1	1	1	1	1	1	1
BC014991.1	IOH12177	N-methylpurine-DNA glycosylase (MPG)	16755.4	0.929825	53	1	1	1	1	1	1	1	1	1	1	1	1	1	1	1	1	0	1	1	0	0	1	0	1	1	1	1	1	1	1	1	1	1	1	1	1	1	1	1	1	1	1	1	1
NM_012325.1	IOH41294	microtubule-associated protein, RP/EB family, member 1 (MAPRE1)	16440	0.859649	49	0	0	1	0	1	1	1	1	1	1	1	0	1	1	1	1	0	1	1	0	1	1	0	0	1	1	1	1	1	1	1	1	1	1	1	1	1	1	1	1	1	1	1	1
NM_002945.2	IOH11757	replication protein A1, 70kDa (RPA1)	15273.5	0.824561	47	0	1	1	0	1	1	1	0	1	1	1	0	1	1	1	1	0	0	1	0	0	1	0	1	1	1	1	1	1	1	1	1	1	1	1	1	1	1	1	1	1	1	1	1
BC025700.1	IOH11281	AF4/FMR2 family, member 4 (AFF4)	14887.5	0.877193	50	0	1	1	1	1	1	1	1	1	1	1	0	1	1	1	1	0	1	1	0	0	1	0	1	1	1	1	1	1	1	1	1	1	1	1	1	1	1	1	1	1	1	1	0
BC026346.1	IOH10816	family with sequence similarity 84, member A (FAM84A)	14879.9	0.894737	51	0	1	0	1	1	1	1	1	0	1	1	1	1	1	1	1	0	1	1	1	0	1	0	1	1	1	1	1	1	1	1	1	1	1	1	1	1	1	1	1	1	1	1	1
NM_032855.1	IOH14623	hematopoietic SH2 domain containing (HSH2D)	14574.3	0.964912	55	1	1	1	1	1	1	1	1	1	1	1	1	1	1	1	1	1	1	1	1	0	1	0	1	1	1	1	1	1	1	1	1	1	1	1	1	1	1	1	1	1	1	1	1
BC047536.1	IOH27737	sciellin (SCEL)	13552.1	0.929825	53	0	1	1	1	1	1	1	1	1	1	1	1	1	1	1	1	0	1	1	1	0	1	0	1	1	1	1	1	1	1	1	1	1	1	1	1	1	1	1	1	1	1	1	1
NM_138565.1	IOH6227	cortactin (CTTN), transcript variant 2	13369.5	0.859649	49	0	0	1	1	1	1	1	1	1	0	1	0	1	1	1	1	0	1	1	0	0	1	0	1	1	1	1	1	1	1	1	1	1	1	1	1	1	1	1	1	1	1	1	1
NM_003975.1	IOH13203	SH2 domain protein 2A (SH2D2A)	12018.7	0.894737	51	0	0	1	1	1	1	1	1	1	1	1	1	1	1	1	1	0	1	1	0	0	1	0	1	1	1	1	1	1	1	1	1	1	1	1	1	1	1	1	1	1	1	1	1
BC016330.1	IOH14709	RAD51 associated protein 1 (RAD51AP1)	11897.1	0.859649	49	0	0	1	1	1	1	1	1	1	1	1	0	1	1	1	1	0	1	1	0	0	1	0	1	1	1	1	1	1	1	1	1	1	1	1	1	1	1	1	1	1	1	1	1
NM_032349.1	IOH6316	nudix (nucleoside diphosphate linked moiety X)-type motif 16-like 1 (NUDT16L1)	11693.3	0.859649	49	0	0	1	0	1	1	1	1	1	1	1	0	1	1	1	1	0	1	1	0	0	1	0	1	1	1	1	1	1	1	1	1	1	1	1	1	1	1	1	1	1	1	1	1
BC001419.1	IOH4071	mitochondrial trans-2-enoyl-CoA reductase (MECR)	11484	0.842105	48	0	0	1	0	1	1	1	1	1	1	1	0	1	1	1	1	0	1	1	0	0	1	0	1	1	1	1	1	1	1	1	1	1	1	1	1	1	0	1	1	1	1	1	1
NM_006790.1	IOH7249	myotilin (MYOT)	11473.9	0.877193	50	0	1	1	0	1	1	1	1	1	1	1	0	1	1	1	1	0	1	1	0	0	1	0	1	1	1	1	1	1	1	1	1	1	1	1	1	1	1	1	1	1	1	1	1
NM_002822.3	IOH40883	twinfilin, actin-binding protein, homolog 1 (Drosophila) (TWF1)	11438.1	0.894737	51	1	0	1	1	1	1	1	1	1	1	1	0	1	1	1	1	1	1	1	0	0	1	0	1	1	1	1	1	1	1	1	1	1	1	1	1	1	1	1	1	1	1	1	1
BC002448.2	IOH4300	actin binding LIM protein 1 (ABLIM1)	11328.5	0.859649	49	0	0	1	1	1	1	1	1	1	1	1	0	0	1	1	1	0	1	1	0	0	1	0	1	1	1	1	1	1	1	1	1	1	1	1	1	1	1	1	1	1	1	1	1
BC053656.1	IOH28981	EGF-like repeats and discoidin I-like domains 3 (EDIL3)	10655.8	0.912281	52	0	1	1	1	1	1	1	1	1	1	1	1	1	1	1	1	0	1	1	0	0	1	0	1	1	1	1	1	1	1	1	1	1	1	1	1	1	1	1	1	1	1	1	1
NM_002714.2	IOH39632	protein phosphatase 1, regulatory (inhibitor) subunit 10 (PPP1R10)	10562.6	0.789474	45	0	0	1	1	1	1	1	1	1	1	1	0	1	1	0	0	0	1	0	0	0	1	0	1	1	1	1	1	1	1	1	1	1	1	0	1	1	1	1	0	1	1	1	1
BC104469.1	IOH63631	Outer dense fiber protein 3-like protein 2	10549.8	0.894737	51	1	0	1	1	1	1	1	1	1	1	1	0	1	1	1	1	0	1	1	0	0	1	0	1	1	1	1	1	1	1	1	1	1	1	1	1	1	1	1	1	1	1	1	1
BC000468.1	IOH3618	ubiquitin-conjugating enzyme E2 variant 1 (UBE2V1)	10529.6	0.877193	50	0	1	1	1	1	1	1	1	1	1	1	0	1	1	1	1	0	1	1	0	0	1	0	1	1	1	1	1	1	1	1	1	1	1	1	1	1	1	1	1	1	1	1	1
NM_145010.1	IOH10871	chromosome 10 open reading frame 63 (C10orf63)	10270.6	0.859649	49	0	0	1	1	1	1	1	1	1	1	1	0	1	1	1	1	1	1	1	0	1	1	0	1	1	1	1	1	0	1	1	1	0	1	1	1	1	1	1	1	1	1	1	1
BC022098.1	IOH14790	cDNA clone MGC:31944 IMAGE:4878869, complete cds	10185.2	0.894737	51	0	1	1	1	1	1	0	1	1	1	1	1	1	1	1	1	0	1	1	0	0	1	0	1	1	1	1	1	1	1	1	1	1	1	1	1	1	1	1	1	1	1	1	1
NM_017772.2	IOH42187	TBC1 domain family member 22B	10125.5	0.859649	49	0	0	1	0	1	1	1	1	1	1	1	0	1	1	1	1	0	1	1	1	0	1	0	0	1	1	1	1	1	1	1	1	1	1	1	1	1	1	1	1	1	1	1	1
BC104468.1	IOH63630	Outer dense fiber protein 3-like protein 2	9855.04	0.789474	45	1	0	1	1	1	1	1	0	1	1	1	0	1	1	1	1	0	1	1	0	0	1	0	1	1	1	1	0	1	0	1	1	0	1	1	1	1	1	0	1	1	1	1	1
BC034488.2	IOH22312	ATP-binding cassette, sub-family F (GCN20), member 1 (ABCF1)	9706.04	0.824561	47	0	0	1	1	1	1	1	1	1	1	0	1	1	1	1	1	0	1	1	0	0	0	0	1	1	1	1	1	1	1	1	1	0	0	1	1	1	1	1	1	1	1	1	1
NM_005522.3	IOH21992	homeobox A1 (HOXA1), transcript variant 1	9641.58	0.77193	44	0	0	0	0	0	1	1	1	1	1	1	0	1	1	1	0	0	1	1	0	0	0	0	1	1	1	1	1	1	1	1	0	1	1	1	1	1	1	1	1	1	1	1	1
BC017865.1	IOH13793	Fc fragment of IgG, low affinity IIIa, receptor (CD16a) (FCGR3A)	9462.43	0.859649	49	0	0	1	0	1	1	1	1	1	1	1	1	0	1	1	1	0	1	1	0	0	1	0	1	1	1	1	1	1	1	1	1	1	1	1	1	1	1	1	1	1	1	1	1
NM_133265.2	IOH38152	angiomotin (AMOT)	9037.75	0.859649	49	0	0	1	0	1	1	1	1	1	1	1	0	1	1	1	1	0	1	1	0	0	1	0	1	1	1	1	1	1	1	1	1	1	1	1	1	1	1	1	1	1	1	1	1
NM_001321.1	IOH1779	cysteine and glycine-rich protein 2 (CSRP2)	8893.37	0.842105	48	0	0	1	0	1	1	1	1	1	1	1	0	1	1	1	1	0	1	1	0	0	1	0	1	1	1	1	1	1	1	1	1	1	1	1	0	1	1	1	1	1	1	1	1
NM_005663.2	IOH46152	Wolf-Hirschhorn syndrome candidate 2 (WHSC2)	8867.95	0.894737	51	0	1	1	1	1	1	1	1	1	1	1	1	1	1	1	1	0	1	1	0	0	1	0	1	1	1	1	1	1	1	1	1	0	1	1	1	1	1	1	1	1	1	1	1
NM_152434.1	IOH42646	CWF19-like 2, cell cycle control (S. pombe) (CWF19L2)	8733.42	0.824561	47	0	0	1	0	1	1	1	1	1	1	1	0	1	1	1	1	0	1	1	0	0	1	0	1	1	1	1	0	1	1	1	1	1	1	1	1	1	1	1	1	1	1	1	1
NM_002625.1	IOH29862	6-phosphofructo-2-kinase/fructose-2,6-biphosphatase 1	8673.5	0.736842	42	0	1	0	0	0	0	1	1	0	1	0	0	1	1	1	1	1	1	1	0	0	1	0	1	1	1	1	0	1	0	1	1	0	1	1	1	1	1	1	1	1	1	1	0
BC092474.1	IOH62679	Proline-rich protein 16	8652.44	0.877193	50	0	0	1	1	1	1	1	1	1	1	1	0	1	1	1	1	0	1	1	0	0	1	0	1	1	1	1	1	1	1	1	1	1	1	1	1	1	1	1	1	1	1	1	1
NM_003093.1	IOH41465	small nuclear ribonucleoprotein polypeptide C (SNRPC)	8507.04	0.789474	45	0	0	1	0	1	1	1	1	1	1	1	1	1	1	1	1	0	0	1	0	0	1	0	1	1	1	0	0	1	1	1	1	1	1	1	1	1	1	1	0	1	1	1	1
BC029382.1	IOH23139	Angiogenic factor with G patch and FHA domains 1	8344.47	0.842105	48	0	0	1	0	1	1	1	1	1	1	1	0	1	1	1	1	0	1	1	0	0	1	0	1	1	1	1	1	1	1	1	1	1	1	1	1	1	1	1	1	1	1	1	1
BC005043.1	IOH6656	hypothetical protein MGC31957 (MGC31957)	8271.82	0.859649	49	0	0	1	0	1	1	1	1	1	1	1	0	1	1	1	1	0	1	1	0	0	1	0	1	1	1	1	1	1	1	1	1	1	1	1	1	1	1	1	1	1	1	1	1
NM_012472.1	IOH26570	leucine rich repeat containing 6 (LRRC6)	8256.89	0.789474	45	0	1	1	0	1	1	0	1	1	1	1	0	1	1	1	0	0	1	1	0	0	1	0	1	1	1	1	1	1	1	1	1	0	1	1	1	1	0	1	1	1	1	1	1
BC002914.1	IOH5733	WAS/WASL-interacting protein family member 1	8147.29	0.859649	49	0	0	1	0	1	1	1	1	1	1	1	0	1	1	1	1	0	1	1	0	0	1	0	1	1	1	1	1	1	1	1	1	1	1	1	1	1	1	1	1	1	1	1	1
BC031691.2	IOH28682	SLAIN motif family, member 2 (SLAIN2)	8098.89	0.877193	50	0	0	1	1	1	1	1	1	1	1	1	0	1	1	1	1	0	1	1	0	0	1	0	1	1	1	1	1	1	1	1	1	1	1	1	1	1	1	1	1	1	1	1	1
NM_014925.2	IOH42727	R3H domain-containing protein 2	8066.86	0.754386	43	0	1	1	0	1	1	1	0	1	0	1	0	0	1	1	0	0	1	1	0	0	1	0	1	1	1	1	1	1	1	1	1	1	1	1	1	1	1	1	1	1	1	1	1
BC005332.1	IOH7177	cDNA clone MGC:12418 IMAGE:3934658, complete cds	8022.6	0.859649	49	0	0	1	0	1	1	1	1	1	1	1	0	1	1	1	1	0	1	1	0	0	1	0	1	1	1	1	1	1	1	1	1	1	1	1	1	1	1	1	1	1	1	1	1
NM_020317.2	IOH4823	chromosome 1 open reading frame 63 (C1orf63)	7931.16	0.894737	51	0	1	1	0	1	1	1	0	1	1	1	1	1	1	1	1	1	1	1	0	0	1	0	1	1	1	1	1	1	1	1	1	1	1	1	1	1	1	1	1	1	1	1	1
NM_015122.1	IOH26137	FCH domain only 1 (FCHO1)	7929.11	0.824561	47	0	0	1	0	1	1	1	1	1	1	1	1	1	1	1	0	0	1	1	0	0	1	0	1	1	1	1	1	1	1	1	1	0	1	1	1	1	1	1	1	1	1	1	1
NM_005884.2	IOH2475	p21(CDKN1A)-activated kinase 4 (PAK4), transcript variant 1	7921.42	0.842105	48	0	0	1	0	1	1	1	1	1	1	1	1	1	1	1	1	0	1	1	1	0	1	0	1	1	1	1	0	1	1	1	1	1	0	1	1	1	1	1	1	1	1	1	1
NM_201998.1	IOH56887	Splicing factor 1	7857.89	0.859649	49	0	0	1	1	1	1	1	1	1	1	1	0	1	1	1	1	0	1	1	0	0	1	0	1	1	1	1	1	1	1	1	1	1	1	1	1	1	1	0	1	1	1	1	1
NM_032017.1	IOH40615	serine/threonine kinase 40 (STK40)	7798.15	0.824561	47	0	0	0	0	1	1	1	1	0	1	1	0	1	1	1	1	0	1	1	0	0	1	0	1	1	1	1	1	1	1	1	1	1	1	1	1	1	1	1	1	1	1	1	1
NM_012289.2	IOH5732	Kelch-like ECH-associated protein 1	7694.18	0.807018	46	0	0	0	0	1	1	1	0	0	1	1	0	1	1	1	1	0	1	1	0	0	1	0	1	1	1	1	1	1	1	1	1	1	1	1	1	1	1	1	1	1	1	1	1
BC011454.1	IOH9647	angiomotin like 2 (AMOTL2)	7668.25	0.842105	48	0	1	1	0	1	1	1	1	1	1	1	0	1	1	1	1	0	1	1	0	0	1	0	1	1	1	1	1	1	1	1	1	1	1	1	1	1	1	1	1	1	1	1	1
NM_152243.1	IOH42102	Cdc42 effector protein 1	7514.95	0.859649	49	0	0	1	0	1	1	1	1	1	1	0	1	1	1	1	1	0	1	1	0	0	1	0	1	1	1	1	1	1	1	1	1	1	1	1	1	1	1	1	1	1	1	1	1
NM_152376.2	IOH26515	UBX domain containing 3 (UBXD3)	7417.15	0.719298	41	0	1	1	0	1	1	1	1	1	1	1	0	1	1	0	0	0	0	0	0	0	1	0	1	1	1	1	0	1	1	1	1	1	0	0	1	1	0	1	1	1	1	1	1
BC020555.1	IOH10305	SERPINE1 mRNA binding protein 1 (SERBP1)	7408.29	0.877193	50	0	0	1	1	1	1	1	1	1	1	1	1	1	1	1	1	0	1	1	0	0	1	0	1	1	1	1	1	1	1	1	1	1	1	1	1	1	0	1	1	1	1	1	1
NM_001312.2	IOH3437	cysteine-rich protein 2 (CRIP2)	7404.62	0.842105	48	0	0	1	0	1	1	1	1	1	1	0	0	1	1	1	1	0	1	1	0	0	1	0	1	1	1	1	1	1	1	1	1	1	1	1	1	1	1	1	1	1	1	1	1
NM_024316.1	IOH12150	leukocyte receptor cluster (LRC) member 1 (LENG1)	7393.61	0.859649	49	0	0	1	1	1	1	1	1	1	1	1	0	1	1	1	1	0	0	1	0	0	1	0	1	1	1	1	1	1	1	1	1	1	1	1	1	1	1	1	1	1	1	1	1
BC033308.1	IOH26796	DAZ interacting protein 1-like (DZIP1L)	7385.57	0.754386	43	0	0	1	0	1	1	1	0	1	1	1	0	1	1	1	1	0	1	1	0	0	0	0	1	0	1	1	1	1	1	1	1	0	0	1	1	1	0	1	1	1	1	1	1
NM_023938.4	IOH3759	Specifically androgen-regulated gene protein	7350.86	0.859649	49	0	0	1	1	1	1	1	1	1	1	1	0	1	1	0	1	0	1	1	0	0	1	0	1	1	1	1	1	1	1	1	1	1	1	1	1	1	1	1	1	1	1	1	1
NM_199190.1	IOH42760	La ribonucleoprotein domain family, member 4 (LARP4), transcript variant 3	7316.86	0.701754	40	0	0	1	0	1	1	1	1	1	1	0	1	1	0	1	0	0	1	1	0	0	1	0	1	1	0	1	0	1	1	1	1	1	1	0	1	0	0	1	1	1	1	0	0
NM_016848.2	IOH11138	SHC-transforming protein 3	7300.66	0.894737	51	0	0	1	1	1	1	1	1	1	1	1	0	1	1	1	1	0	1	1	0	1	1	0	1	1	1	1	1	1	1	1	1	1	1	1	1	1	1	1	1	1	1	1	1
NM_001032293.1	IOH3584	zinc finger protein 207 (ZNF207), transcript variant 2	7256.4	0.789474	45	0	0	1	0	1	1	1	1	0	1	1	0	1	1	1	0	0	1	1	0	0	1	0	1	1	1	1	1	1	1	1	1	0	1	1	1	1	1	1	1	1	1	1	1
NM_032141.1	IOH43707	coiled-coil domain containing 55 (CCDC55), transcript variant 1	7198.27	0.807018	46	0	0	1	1	1	1	1	1	1	1	1	0	1	1	1	1	0	1	1	0	0	1	0	1	1	1	1	1	1	1	1	1	1	1	1	1	1	0	1	1	1	0	1	1
NM_172159.2	IOH25842	potassium voltage-gated channel, shaker-related subfamily, beta member 1 (KCNAB1), transcript variant 3	7069.2	0.824561	47	0	0	1	0	1	1	1	1	0	1	1	0	1	1	1	1	0	1	1	0	0	1	0	1	0	1	1	1	1	1	1	1	1	1	1	1	1	1	1	1	1	1	1	1
NM_005898.4	IOH46168	cell cycle associated protein 1 (CAPRIN1), transcript variant 1	6997.26	0.789474	45	0	0	1	0	1	1	1	1	1	1	1	1	1	1	1	1	0	1	1	0	0	0	0	1	1	1	1	0	1	1	1	1	1	1	0	1	0	1	1	1	0	1	1	1
NM_005558.2	IOH13864	ladinin 1 (LAD1)	6873.46	0.859649	49	0	1	1	0	1	1	1	1	1	1	1	0	1	1	1	1	1	1	1	0	0	1	0	1	1	1	1	0	1	1	1	1	1	1	1	1	1	1	1	1	1	1	1	1
NM_024038.2	IOH5926	chromosome 19 open reading frame 43 (C19orf43)	6834.54	0.77193	44	0	0	1	1	1	1	0	1	1	1	1	0	1	1	1	1	0	1	1	0	0	1	0	1	1	1	1	1	1	1	1	1	1	1	1	1	1	0	1	1	1	1	1	1
NM_004527.2	IOH40231	mesenchyme homeobox 1 (MEOX1), transcript variant 1	6784.78	0.824561	47	0	0	0	0	1	1	1	1	0	1	1	0	1	1	1	1	0	1	1	0	0	1	0	1	1	1	1	1	1	1	1	1	1	1	1	1	1	1	1	1	1	1	1	1
NM_178552.2	IOH27375	chromosome 22 open reading frame 33 (C22orf33)	6747.63	0.824561	47	0	0	1	1	1	1	1	1	1	1	1	0	1	1	1	1	0	1	1	0	0	1	0	1	1	1	1	1	1	1	1	1	1	1	1	1	1	1	1	1	1	1	1	1
NM_012321.1	IOH3488	LSM4 homolog, U6 small nuclear RNA associated (S. cerevisiae) (LSM4)	6741.95	0.807018	46	0	0	1	0	1	1	1	0	1	1	1	0	1	1	1	1	0	1	1	0	0	1	0	1	1	1	1	0	1	1	1	1	1	0	1	1	1	1	1	1	1	1	1	1
PV4202		NIMA (never in mitosis gene a)-related kinase 1 (NEK1)	6677.68	0.859649	49	0	0	1	0	1	1	1	1	1	1	1	0	1	1	1	1	0	1	1	0	0	1	0	1	1	1	1	1	1	1	1	1	1	1	1	1	1	1	1	1	1	1	1	1
BC030592.2	IOH22341	HIV-1 Rev binding protein (HRB)	6657.08	0.649123	37	0	0	1	0	1	1	1	0	1	1	0	0	1	1	0	1	0	1	1	0	0	1	0	0	1	1	1	0	1	0	0	1	1	0	1	1	1	1	0	1	1	1	1	0
NM_006479.2	IOH7384	RAD51 associated protein 1 (RAD51AP1)	6627.68	0.842105	48	0	0	1	1	1	1	1	1	1	1	1	0	1	1	1	1	0	1	1	0	0	1	0	1	1	1	1	1	1	1	1	1	1	1	1	1	1	0	1	1	1	1	1	1
BC032852.2	IOH27153	melanoma antigen family B, 4 (MAGEB4)	6575.4	0.789474	45	0	0	0	0	1	1	1	1	0	1	1	1	1	1	1	0	0	1	1	0	0	1	0	1	1	1	1	1	1	1	1	1	1	0	1	1	1	1	1	1	1	1	1	1
NM_018553.1	IOH44546	Uncharacterized protein C17orf85	6562.64	0.754386	43	0	0	1	0	1	1	1	1	0	1	1	0	1	1	1	0	0	1	0	0	0	1	0	1	1	1	1	0	1	1	1	0	1	1	1	1	1	1	1	1	1	1	1	1
NM_172160.1	IOH35727	potassium voltage-gated channel, shaker-related subfamily, beta member 1 (KCNAB1), transcript variant 1	6510.58	0.824561	47	0	0	1	0	1	1	1	0	1	1	1	0	1	1	1	1	0	1	1	0	0	1	0	1	1	1	1	1	1	1	1	1	1	1	1	1	1	1	1	1	1	1	1	1
NM_032943.2	IOH38478	synaptotagmin-like 2 (SYTL2), transcript variant a	6475.75	0.736842	42	0	0	0	0	1	1	1	1	1	1	0	0	1	1	1	0	0	1	0	0	0	1	0	1	0	1	1	0	1	1	1	1	1	1	1	1	1	0	1	1	1	1	1	1
BC017202.2	IOH57138	Isovaleryl-CoA dehydrogenase, mitochondrial	6418.93	0.701754	40	0	0	0	0	0	1	0	0	0	0	0	0	1	1	1	0	0	1	1	0	0	1	0	0	1	1	1	1	1	1	1	1	1	1	1	1	1	1	1	1	1	1	1	1
NM_018441.2	IOH4050	peroxisomal trans-2-enoyl-CoA reductase (PECR)	6385.3	0.859649	49	0	0	1	0	1	1	1	1	1	1	1	0	1	1	1	1	0	1	1	0	0	1	0	1	1	1	1	1	1	1	1	1	1	1	1	1	1	1	1	1	1	1	1	1
BC042999.2	IOH25869	Putative Polycomb group protein ASXL2	6380.17	0.684211	39	0	0	1	0	0	0	1	1	1	1	1	0	1	1	1	1	0	0	1	0	0	1	0	1	0	1	1	0	1	1	1	1	1	0	1	0	1	1	1	0	1	1	1	1
BC012289.1	IOH11447	KIAA0515 (KIAA0515)	6330.89	0.789474	45	0	0	1	0	1	1	1	1	1	1	1	0	1	1	1	0	0	1	1	0	0	1	0	1	1	1	1	1	1	1	1	1	1	0	1	1	1	1	1	1	1	1	1	1
NM_014943.3	IOH28064	zinc fingers and homeoboxes 2 (ZHX2)	6138.69	0.789474	45	0	0	1	0	1	1	1	1	1	1	0	1	1	1	1	1	0	1	0	0	0	1	0	0	1	1	1	0	1	1	1	1	0	1	1	1	1	1	1	1	1	1	1	1
NM_004281.2	IOH6609	BCL2-associated athanogene 3 (BAG3)	6078.79	0.789474	45	1	0	1	0	1	1	1	0	1	1	1	0	1	1	1	0	0	1	0	0	0	1	0	1	1	1	1	1	1	1	1	1	1	1	1	1	1	1	1	1	1	1	1	1
BC002488.1	IOH3970	SERPINE1 mRNA binding protein 1 (SERBP1)	6017.85	0.807018	46	0	0	1	1	1	1	1	1	1	1	1	0	1	1	1	1	0	1	1	0	0	1	0	1	1	1	1	1	1	1	1	1	1	1	1	0	1	0	1	1	1	1	0	1
NM_144659.1	IOH21795	t-complex 10 (mouse)-like (TCP10L)	6011.04	0.842105	48	0	1	1	1	1	1	1	1	1	1	1	0	1	1	1	1	0	1	1	0	0	1	0	1	1	1	1	0	1	1	1	1	1	1	1	1	1	0	1	1	1	1	1	1
NM_198513.1	IOH11823	PHD finger protein 20-like 1 (PHF20L1), transcript variant 3	6005.23	0.807018	46	0	0	1	1	1	1	1	1	1	1	1	0	1	1	0	1	0	1	1	0	0	1	0	1	1	1	1	0	1	1	1	1	1	1	1	1	1	1	1	1	1	1	1	1
BC014020.1	IOH13375	BAI1-associated protein 2 (BAIAP2)	5918.09	0.859649	49	0	0	1	1	1	1	1	1	1	1	1	0	1	1	1	1	0	1	1	0	0	1	0	1	1	1	1	0	1	1	1	1	1	1	1	1	1	1	1	1	1	1	1	1
NM_007177.1	IOH10203	Protein FAM107A	5861.25	0.736842	42	0	0	0	0	1	1	1	1	0	1	0	0	1	1	1	1	0	1	0	0	0	1	0	1	1	1	1	0	1	1	1	1	1	0	1	1	1	1	1	1	1	1	1	1
BC064840.1	IOH40500	Histone deacetylase 7	5849.54	0.807018	46	0	0	1	1	1	1	1	1	1	1	0	0	1	1	1	0	0	1	1	0	0	1	0	1	1	1	1	1	1	1	1	1	1	1	1	1	1	0	1	1	1	1	1	1
NM_152377.1	IOH11555	chromosome 1 open reading frame 87 (C1orf87)	5836.25	0.842105	48	0	0	1	1	1	1	1	1	1	1	1	0	1	1	1	1	0	1	1	0	0	1	0	1	1	1	1	1	1	1	1	1	1	1	0	1	1	1	1	1	1	1	1	1
BC001304.1	IOH45994	piccolo (presynaptic cytomatrix protein) (PCLO)	5823.77	0.77193	44	0	0	1	1	1	1	1	1	1	1	1	0	1	1	1	1	1	1	1	0	0	1	0	1	0	1	1	0	1	1	1	1	1	0	1	1	1	0	1	1	1	1	1	1
NM_006640.2	IOH12164	septin 9 (SEPT9)	5796.08	0.631579	36	1	0	1	1	1	0	1	1	1	1	1	0	1	1	0	1	0	1	1	0	0	1	0	1	0	1	0	0	0	0	0	1	1	0	0	0	1	1	0	1	1	1	1	1
NM_006449.2	IOH12552	CDC42 effector protein (Rho GTPase binding) 3 (CDC42EP3)	5759.89	0.842105	48	0	0	1	1	1	1	1	1	1	1	1	1	1	1	1	0	0	1	0	0	0	1	0	1	1	1	1	1	1	1	1	1	1	1	1	1	1	1	1	1	1	1	1	1
BC072461.1	IOH62565	Cysteine and histidine-rich domain-containing protein 1	5754.46	0.789474	45	0	0	1	0	1	1	1	1	1	1	1	0	1	1	1	1	0	1	1	0	0	1	0	1	1	1	0	1	1	1	1	1	0	1	1	1	1	0	1	1	1	1	1	1
BC013437.1	IOH9908	myocyte enhancer factor 2A (MEF2A)	5725.96	0.736842	42	0	1	1	0	1	1	1	0	1	1	1	1	1	1	0	0	0	1	0	0	0	1	0	0	1	1	1	0	1	1	1	1	1	1	1	1	1	1	1	1	1	1	1	0
NM_006651.2	IOH4343	complexin 1 (CPLX1)	5669.07	0.666667	38	0	1	1	1	1	1	1	1	0	1	1	0	1	1	1	1	0	1	1	0	0	0	0	1	1	1	1	0	1	1	1	0	0	1	0	0	0	0	1	0	0	1	1	1
NM_003177.3	IOH4914	spleen tyrosine kinase (SYK)	5664.39	0.807018	46	0	0	1	0	1	1	1	0	1	0	1	0	1	1	1	0	0	1	1	0	0	1	0	1	1	1	1	1	1	1	1	1	1	1	1	1	1	1	1	1	1	1	1	1
NM_173060.1	IOH52621	Calpastatin	5661.27	0.719298	41	0	0	1	0	0	1	1	1	1	1	1	1	1	1	1	1	0	1	1	0	0	1	0	1	0	1	1	1	1	1	0	0	1	1	1	1	1	0	1	1	1	1	0	0
BC009894.2	IOH14557	3'-phosphoadenosine 5'-phosphosulfate synthase 2 (PAPSS2)	5618.42	0.842105	48	0	0	1	0	1	1	1	1	1	1	1	0	1	1	1	1	0	1	1	0	0	1	0	1	1	1	1	1	1	1	1	1	0	1	1	1	1	1	1	1	1	1	1	1
NM_016203.2	IOH42382	protein kinase, AMP-activated, gamma 2 non-catalytic subunit (PRKAG2), transcript variant a, mRNA.	5618.32	0.842105	48	0	0	1	0	1	1	1	1	1	0	1	0	1	1	1	1	0	1	1	0	0	1	0	1	1	1	1	1	1	1	1	1	1	1	1	1	1	1	1	1	1	1	1	1
NM_016520.1	IOH5899	chromosome 9 open reading frame 78 (C9orf78)	5522.57	0.754386	43	0	0	0	1	1	1	1	1	0	1	1	0	1	1	1	1	0	1	1	0	0	1	0	1	1	1	1	0	0	1	1	1	1	1	1	0	1	0	1	1	1	1	1	1
BC015665.2	IOH40642	LATS, large tumor suppressor, homolog 1 (Drosophila) (LATS1)	5522.56	0.824561	47	0	0	1	1	1	1	1	1	1	1	1	0	1	1	1	0	0	1	1	0	0	1	0	1	1	1	1	1	1	1	1	1	1	0	1	1	1	1	1	1	1	1	1	1
BC026039.1	IOH40656	mitochondrial GTPase 1 homolog (S. cerevisiae) (MTG1)	5511.68	0.789474	45	0	0	0	0	1	1	1	1	0	1	1	0	1	1	1	0	0	0	1	0	0	1	0	1	1	1	1	1	1	1	1	1	1	1	1	1	1	1	1	1	1	1	1	1
PV3359		Ephrin receptor A3 (EPHA3), transcript variant 1	5502.82	0.859649	49	0	0	1	1	1	1	1	1	1	1	1	0	1	1	1	0	0	1	1	0	0	1	0	1	1	1	1	1	1	1	1	1	1	1	1	1	1	1	1	1	1	1	1	1
BC048299.1	IOH26615	spermatogenesis associated, serine-rich 2 (SPATS2)	5476.93	0.807018	46	0	0	0	0	1	1	1	1	1	1	1	0	1	1	0	1	0	1	1	0	0	1	0	1	1	1	1	1	1	1	1	1	1	1	1	1	1	1	1	1	1	1	1	1
NM_004732.1	IOH29581	potassium voltage-gated channel, shaker-related subfamily, beta member 3 (KCNAB3)	5454.24	0.807018	46	0	0	1	0	1	1	1	1	0	1	1	0	1	1	1	0	0	1	1	0	0	1	0	1	1	1	1	1	1	1	1	1	1	1	1	1	1	0	1	1	1	1	1	1
NM_014763.2	IOH23003	mitochondrial ribosomal protein L19 (MRPL19), nuclear gene encoding mitochondrial protein	5431.92	0.859649	49	0	0	1	0	1	1	1	1	1	1	1	0	1	1	1	1	0	1	1	0	0	1	0	1	1	1	1	1	1	1	1	1	1	1	1	1	1	1	1	1	1	1	1	1
BC002733.2	IOH5365	chromosome 1 open reading frame 77 (C1orf77)	5427.77	0.824561	47	0	0	1	0	1	1	1	1	1	1	1	1	1	1	1	1	0	1	1	0	0	1	0	1	1	1	1	1	1	1	0	1	1	1	1	1	1	1	1	1	1	1	1	1
BC000442.1		Serine/threonine-protein kinase 12	5418.74	0.807018	46	0	0	1	0	1	1	1	0	0	1	1	0	1	1	0	1	0	1	1	0	0	1	0	1	1	1	1	1	1	1	1	1	1	1	1	1	1	1	1	1	1	1	1	1
BC015505.1	IOH9981	DEAD (Asp-Glu-Ala-Asp) box polypeptide 42 (DDX42)	5395	0.754386	43	0	0	1	0	1	1	1	1	1	1	1	0	1	1	1	0	0	1	1	0	0	1	0	1	1	1	1	0	1	1	1	1	1	0	1	1	0	1	1	1	1	0	1	1
BC009055.1	IOH3376	Protein FAM184A	5369.62	0.807018	46	0	0	1	1	1	1	1	1	1	1	0	0	1	1	1	1	0	1	1	0	0	1	0	1	0	1	1	1	1	1	1	1	1	1	1	1	1	0	1	1	1	1	1	1
NM_176791.2	IOH26363	family with sequence similarity 112, member A (FAM112A), transcript variant 1	5211.98	0.77193	44	0	0	1	0	1	1	1	1	1	1	1	0	1	1	1	1	0	1	1	0	0	1	0	1	1	1	0	0	1	1	0	1	1	1	1	1	1	1	1	1	0	1	1	1
NM_198467.1	IOH40427	round spermatid basic protein 1-like (RSBN1L)	5188.24	0.701754	40	0	0	1	0	1	1	1	0	1	0	0	0	1	1	1	0	0	1	0	0	0	1	0	1	1	1	1	0	1	1	1	1	1	0	1	1	1	0	1	1	1	1	1	1
BC042608.1	IOH27462	family with sequence similarity 90, member A1 (FAM90A1)	5185.68	0.842105	48	0	0	1	0	1	1	1	1	1	1	1	0	1	1	1	1	0	1	1	0	0	1	0	1	1	1	1	1	1	1	1	1	1	1	1	1	1	1	1	1	1	1	1	1
NM_003130.1	IOH13042	sorcin (SRI), transcript variant 1	5158.38	0.684211	39	0	1	1	0	1	1	1	1	1	1	1	0	1	1	1	1	0	1	1	0	0	1	0	1	1	1	0	0	1	0	0	1	1	1	1	1	1	0	1	1	1	1	1	0
BC080187.1	IOH62553	Leiomodin-1	5132.46	0.736842	42	0	0	1	0	1	1	1	1	1	1	0	0	1	1	1	0	0	1	1	0	0	1	0	1	1	1	0	0	1	1	1	1	1	1	1	1	1	1	1	1	1	1	1	1
BC098117.1	IOH63340	CaiB/baiF CoA-transferase family protein C7orf10	5091.15	0.649123	37	0	0	0	0	1	1	0	0	0	1	0	0	0	0	0	0	0	0	0	0	0	1	0	0	1	1	1	1	1	1	1	1	1	1	1	1	1	1	1	1	1	1	1	1
NM_199188.1	IOH38224	La ribonucleoprotein domain family, member 4 (LARP4), transcript variant 2	5090.91	0.789474	45	0	0	1	0	0	1	1	1	1	1	0	1	1	1	1	0	0	1	1	0	0	1	0	1	1	1	1	0	1	1	1	1	0	1	1	1	1	1	1	1	1	1	1	1
NM_001030002.1	IOH55430	Growth factor receptor-bound protein 7	5088.41	0.807018	46	0	0	1	0	1	1	1	1	0	1	1	0	1	1	1	0	0	1	1	0	0	1	0	1	1	1	1	1	1	1	1	1	1	1	1	1	1	1	1	1	1	1	1	1
BC001755.1	IOH4451	Leiomodin-1	5072.05	0.754386	43	0	0	1	0	1	1	1	1	1	1	1	0	1	1	1	0	0	1	1	0	0	1	0	1	1	1	0	1	1	1	1	1	1	1	1	0	1	1	1	0	1	1	0	1
BC026101.2	IOH10652	nudE nuclear distribution gene E homolog (A. nidulans)-like 1 (NDEL1)	5060.8	0.754386	43	0	0	0	0	1	1	1	1	0	1	0	0	1	1	1	1	0	1	1	0	0	1	0	1	1	1	0	0	1	1	1	1	1	0	1	1	1	1	1	1	1	1	1	1
BC012109.1	IOH12380	homer homolog 2 (Drosophila) (HOMER2)	5054.57	0.824561	47	0	0	1	0	1	1	1	1	0	1	1	0	1	1	1	1	0	1	1	0	0	1	0	1	1	1	1	0	1	1	1	1	1	1	1	1	1	1	1	1	1	1	1	1
NM_006591.1	IOH41599	polymerase (DNA-directed), delta 3, accessory subunit (POLD3)	5045.04	0.807018	46	0	0	1	1	1	1	1	1	1	1	0	0	1	1	1	0	0	1	1	0	0	1	0	1	1	1	1	0	1	1	1	1	1	1	1	1	1	1	1	1	1	1	1	1
NM_152763.2	IOH22315	chromosome 1 open reading frame 62 (C1orf62)	5039.41	0.824561	47	0	0	1	1	1	1	1	1	1	1	1	0	1	1	1	0	0	1	1	1	0	1	0	1	1	1	1	1	1	1	1	1	0	1	1	1	1	1	1	1	1	1	1	1
BC050645.1	IOH27032	bystin-like (BYSL)	4876.45	0.807018	46	0	0	0	1	0	1	1	1	0	1	0	1	1	1	1	1	0	1	1	0	0	1	0	1	1	1	1	1	1	1	1	1	1	1	1	1	1	1	1	1	1	1	1	1
BC014271.2	IOH13908	endoglin (Osler-Rendu-Weber syndrome 1) (ENG)	4873.07	0.842105	48	0	0	1	0	1	1	1	1	1	1	1	0	1	1	1	1	0	1	1	0	0	1	0	1	1	1	1	1	1	1	1	1	1	1	1	1	1	1	1	1	1	1	1	1
NM_080659.1	IOH7410	chromosome 11 open reading frame 52 (C11orf52)	4862.94	0.824561	47	0	0	1	0	1	1	1	1	0	1	1	0	1	1	1	1	0	1	1	0	0	1	0	1	1	1	1	1	1	1	1	1	1	0	1	1	1	1	1	1	1	1	1	1
NM_005030.2	IOH5070	polo-like kinase 1 (Drosophila) (PLK1)	4842.61	0.859649	49	0	0	1	0	1	1	1	1	1	1	1	0	1	1	1	1	0	1	1	0	0	1	0	1	1	1	1	1	1	1	1	1	1	1	1	1	1	1	1	1	1	1	1	1
BC067755.1	IOH40120	potassium channel tetramerisation domain containing 18 (KCTD18)	4831.52	0.824561	47	0	0	1	1	1	1	1	1	1	1	1	0	1	1	1	1	0	1	1	0	0	0	0	1	1	1	1	1	1	1	1	1	1	0	1	0	1	1	1	1	1	1	1	1
BC006318.1	IOH6433	erythrocyte membrane protein band 4.9 (dematin) (EPB49)	4830.34	0.807018	46	0	0	0	1	1	1	1	1	0	1	1	0	1	1	1	1	0	1	1	0	0	1	0	1	0	1	1	1	1	1	1	1	1	1	1	1	1	1	1	1	1	1	1	1
BC010852.1	IOH9927	Aflatoxin B1 aldehyde reductase member 2	4825.11	0.842105	48	0	0	1	0	1	1	1	1	1	1	1	0	1	1	1	1	0	1	1	0	0	1	0	1	1	1	1	1	1	1	1	1	1	1	1	1	1	1	1	1	1	1	1	1
NM_015640.1	IOH22934	SERPINE1 mRNA binding protein 1 (SERBP1), transcript variant 4	4821.37	0.701754	40	0	0	1	1	1	1	1	1	1	0	1	0	1	1	1	0	0	1	1	0	0	1	0	1	1	1	1	0	1	1	1	1	1	0	1	1	1	0	1	1	1	0	1	1
NM_016207.2	IOH14059	cleavage and polyadenylation specific factor 3, 73kDa (CPSF3)	4813.5	0.824561	47	0	0	1	0	1	1	1	1	0	1	1	0	1	1	1	1	0	1	1	0	0	1	0	1	1	1	1	1	1	1	1	0	1	1	1	1	1	1	1	1	1	1	1	1
BC010501.1	IOH10253	Catenin delta-1	4790.74	0.666667	38	0	0	1	0	1	1	1	0	1	1	0	0	1	1	0	0	0	0	1	0	0	1	0	0	1	1	1	0	1	1	0	1	1	1	1	1	1	0	1	1	1	1	0	1
BC093051.1	IOH63174	Nuclear protein Hcc-1	4788.42	0.736842	42	0	0	0	1	1	1	1	1	0	1	0	0	1	1	1	0	0	1	1	0	0	1	0	1	1	1	1	0	1	1	1	1	1	1	1	1	1	0	1	1	1	0	1	1
NM_144982.1	IOH12275	coiled-coil domain containing 131 (CCDC131)	4785.17	0.807018	46	0	0	1	0	1	1	1	1	1	1	1	0	1	1	1	0	0	1	1	0	0	1	0	1	1	1	1	0	1	1	1	1	1	1	1	1	1	1	1	1	1	1	1	1
NM_148176.1	IOH4678	peptidylprolyl isomerase (cyclophilin)-like 2 (PPIL2), transcript variant 3	4752.68	0.736842	42	0	0	1	1	1	1	1	1	1	1	1	0	1	1	1	0	0	1	0	0	0	1	0	1	1	1	0	0	1	1	1	0	1	0	1	1	1	0	1	1	1	1	1	1
BC002369.1		Serine/threonine-protein kinase PLK1	4730.45	0.77193	44	0	0	1	0	1	1	1	0	0	1	1	0	1	1	0	0	0	1	1	0	0	1	0	1	1	1	1	1	1	1	1	1	1	1	1	1	1	1	1	1	1	1	1	1
NM_025241.1	IOH41143	UBX domain containing 1 (UBXD1)	4722.96	0.736842	42	0	0	1	0	1	1	1	1	1	1	1	0	1	1	0	1	0	1	0	0	0	1	0	1	1	1	0	0	1	1	1	1	1	0	1	1	1	0	1	1	1	1	1	1
NM_001092.3	IOH39490	active BCR-related gene (ABR), transcript variant 2	4706.23	0.684211	39	0	0	0	0	1	1	1	0	1	1	0	0	1	0	1	0	0	1	1	0	0	1	0	1	0	1	1	1	1	1	1	1	1	1	1	1	1	0	1	1	1	1	1	1
BC035404.2	IOH27426	PTK2 protein tyrosine kinase 2 (PTK2)	4704.15	0.701754	40	0	0	0	0	1	1	1	1	0	1	0	0	1	1	0	1	0	1	1	0	0	0	0	1	1	1	1	0	1	1	1	1	1	1	0	0	1	1	1	1	1	1	1	1
NM_015138.2	IOH10055	Rtf1, Paf1/RNA polymerase II complex component, homolog (S. cerevisiae) (RTF1)	4702.11	0.684211	39	0	0	0	0	1	1	1	1	0	1	1	0	1	1	0	0	0	0	1	0	0	1	0	0	1	1	1	0	1	1	1	1	1	1	1	1	1	1	1	1	1	0	1	1
NM_023940.1	IOH6072	RAS-like, family 11, member B (RASL11B)	4688.13	0.789474	45	0	0	1	0	1	1	1	0	1	1	0	0	1	1	1	1	0	1	0	0	0	1	0	1	1	1	1	1	1	1	1	1	1	1	1	1	1	1	1	1	1	1	1	1
NM_020417.1	IOH46271	T-box transcription factor TBX20	4684.24	0.631579	36	0	0	0	0	1	1	1	1	0	1	1	0	1	1	1	0	0	1	1	1	0	1	0	1	1	1	0	0	0	1	1	1	1	0	1	1	1	0	0	1	1	1	0	1
BC036056.1	IOH27184	Fanconi anemia, complementation group M (FANCM)	4681.84	0.842105	48	0	0	1	0	1	1	1	1	1	1	1	0	1	1	1	0	0	1	1	0	0	1	0	1	1	1	1	1	1	1	1	1	1	1	1	1	1	1	1	1	1	1	1	1
BC009108.1	IOH10191	cDNA clone IMAGE:3451214 (MCM10)	4660.02	0.842105	48	0	0	1	0	1	1	1	1	1	1	1	0	1	1	1	1	0	1	1	0	1	1	0	1	1	1	1	0	1	1	1	1	1	0	1	1	1	1	1	1	1	1	1	1
BC014969.1	IOH12203	activating transcription factor 6 (ATF6)	4639.43	0.807018	46	0	0	1	0	1	1	1	1	1	1	1	0	1	1	1	1	0	1	1	0	0	1	0	1	1	1	1	0	1	1	1	1	0	1	1	1	1	1	1	1	1	1	1	1
NM_005517.2	IOH40568	high-mobility group nucleosomal binding domain 2 (HMGN2)	4638.1	0.736842	42	0	0	1	0	1	1	1	1	1	1	0	0	1	1	0	0	0	1	0	0	0	1	0	1	1	1	1	0	1	1	1	1	1	0	1	1	1	1	1	1	1	1	1	1
BC000712.1	IOH4703	kinesin family member C1 (KIFC1)	4620.2	0.719298	41	0	0	1	0	1	1	1	1	0	1	0	0	1	1	1	0	0	1	0	0	0	0	0	1	1	1	1	0	1	1	1	1	1	1	1	1	1	1	1	1	1	1	1	1
NM_178151.1	IOH22620	doublecortex; lissencephaly, X-linked (doublecortin) (DCX), transcript variant 4	4603.27	0.736842	42	0	0	1	1	1	1	1	1	1	1	1	0	1	1	1	1	0	1	1	0	0	0	0	1	1	1	1	1	1	1	1	1	1	1	0	0	1	0	1	1	1	1	1	1
BC008741.1	IOH5919	PDZ and LIM domain 5 (PDLIM5)	4603.18	0.754386	43	0	0	0	1	1	1	1	1	0	0	1	0	1	1	1	1	0	1	1	0	0	1	0	1	1	1	1	0	1	1	1	1	0	1	1	1	1	0	1	1	1	1	1	1
BC029796.1	IOH22647	hypothetical protein BC014011 (LOC116349)	4580.75	0.859649	49	0	1	1	0	1	1	1	1	1	1	1	0	1	1	1	1	0	1	1	0	0	1	0	1	1	1	1	1	1	1	1	1	1	0	1	1	1	1	1	1	1	1	1	1
NM_002813.4	IOH3657	proteasome (prosome, macropain) 26S subunit, non-ATPase, 9 (PSMD9)	4563.5	0.789474	45	0	0	1	0	0	1	1	1	1	1	1	0	1	1	1	0	0	1	1	0	0	1	0	1	1	1	1	1	1	1	1	1	1	1	1	1	1	1	1	1	1	1	1	1
NM_178152.1	IOH20954	Neuronal migration protein doublecortin	4551.96	0.824561	47	0	0	1	1	1	1	1	0	1	1	1	0	1	1	1	0	0	1	1	0	0	1	0	1	1	1	1	1	1	1	1	1	1	1	1	1	1	1	1	1	1	1	1	1
BC054520.1	IOH28900	myocyte enhancer factor 2D (MEF2D)	4549.2	0.736842	42	0	0	1	0	1	1	1	0	1	1	0	0	1	0	1	0	0	1	0	0	0	1	0	1	1	1	1	0	1	1	1	1	1	1	1	1	1	1	1	1	1	1	1	1
BC017570.1	IOH27880	chromosome 9 open reading frame 78 (C9orf78)	4541.34	0.754386	43	0	0	0	0	1	1	1	1	0	1	1	0	1	1	1	1	0	1	1	0	0	1	0	1	1	1	0	0	1	1	1	1	1	1	1	1	1	1	1	1	1	1	1	1
NM_018357.2	IOH6558	La ribonucleoprotein domain family, member 6 (LARP6), transcript variant 1	4537.39	0.77193	44	0	0	1	0	1	1	1	0	1	1	0	0	1	1	1	1	0	1	1	0	0	1	0	1	1	1	1	1	1	1	1	1	1	0	1	1	1	0	1	1	1	1	1	1
BC046117.1	IOH26985	dynein, axonemal, light intermediate chain 1 (DNALI1)	4534.52	0.719298	41	0	0	1	0	1	1	1	1	1	1	1	0	0	0	1	1	0	1	1	0	0	1	0	1	1	1	0	0	1	1	0	1	1	1	0	1	1	0	1	1	1	1	1	1
NM_007030.1	IOH43477	tubulin polymerization promoting protein (TPPP)	4533.79	0.824561	47	0	0	1	0	1	1	1	1	1	1	0	1	1	1	1	1	0	1	1	0	0	1	0	1	1	1	1	0	1	1	1	1	1	1	1	1	1	1	1	1	1	1	1	1
BC006106.1	IOH6536	ribosomal protein S6 kinase, 70kDa, polypeptide 2 (RPS6KB2)	4529.32	0.736842	42	0	0	0	0	1	1	1	1	0	1	1	0	1	1	1	0	0	1	1	0	0	1	0	1	1	1	1	0	1	1	1	1	1	0	1	1	1	0	1	1	1	1	1	1
NM_004349.2	IOH36626	runt-related transcription factor 1; translocated to, 1 (cyclin D-related) (RUNX1T1), transcript variant 1	4523.31	0.701754	40	0	0	0	0	1	1	1	0	0	1	1	0	1	1	1	1	0	1	1	0	0	1	0	1	1	1	1	1	1	1	1	1	0	0	0	1	1	0	1	1	1	1	1	1
PV3878		MAP/microtubule affinity-regulating kinase 2 (MARK2), transcript variant 3	4514.42	0.719298	41	0	0	0	0	1	1	1	1	1	1	0	0	1	0	1	0	0	0	0	0	0	1	0	1	1	1	1	1	1	1	1	1	1	0	1	1	1	1	1	1	1	1	0	1
BC011707.1	IOH13976	nuclear receptor binding factor 2 (NRBF2)	4465.33	0.789474	45	0	0	1	1	1	0	1	0	1	1	0	0	1	1	1	1	0	1	1	0	0	1	0	1	1	1	1	0	1	1	1	1	1	1	1	1	1	1	1	1	1	1	1	1
NM_014891.1	IOH4282	PDGFA associated protein 1 (PDAP1)	4424.01	0.754386	43	0	1	1	1	1	1	1	0	0	1	0	0	1	1	1	0	0	1	1	0	0	1	0	1	1	1	1	1	1	1	1	1	1	1	0	1	1	1	0	1	1	1	1	1
NM_022140.2	IOH38016	Band 4.1-like protein 4A	4415.95	0.789474	45	0	0	1	0	1	1	1	1	1	1	1	0	1	1	1	0	0	1	1	0	0	1	0	0	1	1	1	0	1	1	1	1	1	1	1	1	1	1	1	1	1	1	1	1
NM_138419.1	IOH22975	Protein FAM54A	4397.79	0.824561	47	0	0	1	1	1	1	1	1	1	1	1	0	1	1	1	0	0	1	1	0	0	1	0	1	1	1	1	0	1	1	1	1	1	1	1	1	1	1	1	0	1	1	1	1
BC014924.1	IOH25747	kinesin family member 2C (KIF2C)	4389.04	0.807018	46	1	0	0	0	1	1	1	1	0	1	1	0	1	1	1	1	0	1	1	0	0	1	0	1	1	1	1	1	1	1	1	1	1	1	1	1	1	1	1	1	1	1	1	1
BC021573.1	IOH14848	GTP-binding protein 10	4386.57	0.736842	42	0	0	1	0	1	1	1	0	1	1	1	0	1	1	0	1	0	1	1	0	0	1	0	1	1	1	1	0	0	1	1	1	0	1	1	1	1	1	1	1	1	1	0	1
NM_004450.1	IOH14288	enhancer of rudimentary homolog (Drosophila) (ERH)	4381.54	0.789474	45	0	0	1	0	1	1	1	1	1	1	1	0	1	1	1	0	0	1	1	0	0	1	0	1	1	1	0	0	1	1	1	1	1	0	1	1	1	1	1	1	1	1	1	1
NM_033082.1	IOH7469	Nuclear protein Hcc-1	4375.53	0.666667	38	0	0	0	1	1	0	1	1	0	1	1	1	1	1	1	1	0	1	1	0	0	1	0	1	1	1	0	0	1	1	0	1	1	1	0	0	1	0	1	1	0	1	0	0
NM_006788.2	IOH10874	RalA-binding protein 1	4372.9	0.754386	43	0	0	1	0	1	1	1	0	1	1	0	0	1	1	1	1	0	1	0	0	0	0	0	1	1	1	1	1	1	1	1	1	1	1	1	1	1	1	1	0	1	1	1	1
NM_080664.1	IOH9768	chromosome 14 open reading frame 126 (C14orf126)	4358.83	0.754386	43	0	0	0	0	1	1	0	0	0	1	1	0	1	1	1	1	0	1	1	0	0	1	0	1	1	1	0	1	1	1	1	1	0	1	1	1	1	1	1	1	1	1	1	1
BC059947.1	IOH39895	chondrosarcoma associated gene 1 (CSAG1)	4348.7	0.736842	42	0	0	1	0	1	1	1	1	1	1	1	0	1	1	1	0	0	1	1	0	0	0	0	1	1	1	1	0	1	1	1	1	1	1	1	0	1	0	1	1	1	1	1	1
BC007363.1	IOH21168	branched chain ketoacid dehydrogenase kinase (BCKDK)	4327.22	0.859649	49	0	0	1	0	1	1	1	1	1	1	1	0	1	1	1	1	0	1	1	0	0	1	0	1	1	1	1	1	1	1	1	1	1	1	1	1	1	1	1	1	1	1	1	1
BC022996.1	IOH10666	SH3 domain-binding protein 2	4322.58	0.684211	39	0	0	1	0	1	1	1	0	1	1	1	0	1	1	1	1	0	1	1	0	0	1	0	1	0	1	1	0	0	1	1	1	0	1	1	0	1	0	1	1	1	1	1	1
NM_152340.1	IOH42183	hypothetical protein FLJ39075 (FLJ39075)	4306.5	0.736842	42	0	0	0	0	1	1	0	0	0	0	0	0	1	1	1	0	0	1	1	0	0	1	0	1	1	1	1	1	1	1	1	1	1	1	1	1	1	1	1	1	1	1	1	1
NM_006148.1	IOH54875	LIM and SH3 domain protein 1	4293.89	0.719298	41	0	0	1	0	1	1	0	1	1	1	1	1	1	0	1	0	0	1	1	0	0	1	0	0	1	1	1	0	1	1	1	1	1	0	1	1	1	0	1	1	1	1	1	1
XM_378514.1	IOH42688	PREDICTED: Homo sapiens hypothetical protein LOC283663 (LOC283663), mRNA	4285.09	0.807018	46	0	0	1	0	1	1	1	1	1	1	1	0	1	1	1	1	0	1	1	0	0	1	0	1	1	1	1	0	1	1	1	1	1	1	1	1	1	1	1	1	1	1	1	1
BC053562.1	IOH29038	CREB regulated transcription coactivator 2 (CRTC2)	4281.67	0.736842	42	0	0	1	0	1	1	1	0	1	1	0	0	1	0	1	0	0	1	1	0	0	1	0	1	1	1	1	0	1	1	0	1	1	1	1	1	1	1	1	0	1	1	1	1
NM_003893.2	IOH3707	LIM domain-binding protein 1	4276.62	0.754386	43	0	0	1	0	1	1	1	0	1	0	1	1	1	1	1	1	0	1	1	0	0	1	0	1	1	1	1	0	1	1	1	1	0	1	1	1	1	0	1	1	1	0	1	1
BC018060.1	IOH11303	Ras-like without CAAX 2 (RIT2)	4268.82	0.719298	41	0	0	0	0	1	1	1	1	0	1	1	0	1	1	1	0	0	1	1	0	0	1	0	1	1	1	0	0	1	1	1	1	1	1	0	1	1	0	1	1	1	1	1	1
NM_152387.2	IOH53987	BTB/POZ domain-containing protein KCTD18	4264.99	0.824561	47	0	0	1	0	1	1	1	1	1	1	1	0	1	1	1	1	0	1	1	0	0	1	0	1	1	1	1	1	1	1	1	1	1	0	1	1	1	1	1	1	1	1	1	1
NM_024309.1	IOH5379	TNFAIP3-interacting protein 2	4264.27	0.824561	47	0	0	1	0	1	1	1	1	1	1	1	0	1	1	1	1	0	1	1	0	0	1	0	1	1	1	1	0	1	1	1	1	0	1	1	1	1	1	1	1	1	1	1	1
NM_004846.1	IOH6102	eukaryotic translation initiation factor 4E family member 2 (EIF4E2)	4247.96	0.77193	44	0	0	0	0	1	0	1	1	1	1	1	0	1	1	1	0	0	1	1	0	0	1	0	1	1	1	1	1	1	1	1	1	1	1	1	0	1	1	1	1	1	1	1	1
NM_203305.1	IOH26383	family with sequence similarity 102, member A (FAM102A), transcript variant 2	4235.32	0.649123	37	0	0	1	0	1	1	1	1	1	1	1	0	1	1	1	1	0	1	1	0	0	1	0	1	1	1	1	0	0	1	0	1	0	1	1	0	1	0	0	1	0	1	0	1
BC037567.1	IOH27585	alanine-glyoxylate aminotransferase 2-like 2 (AGXT2L2)	4228.62	0.736842	42	0	0	0	0	1	0	1	1	0	0	0	0	1	1	1	0	0	1	1	0	0	1	0	1	1	1	1	1	1	1	1	1	1	1	1	1	1	1	1	1	1	1	1	1
NM_175634.1	IOH42249	Protein CBFA2T1	4227.25	0.719298	41	0	0	0	0	1	1	1	0	0	1	1	0	1	1	1	0	0	1	1	0	0	1	0	1	1	1	1	1	1	1	1	1	0	0	0	1	1	1	1	1	1	1	1	1
NM_198395.1	IOH7337	GTPase activating protein (SH3 domain) binding protein 1 (G3BP1), transcript variant 2	4183.53	0.77193	44	0	0	1	0	1	1	1	1	1	1	1	0	1	1	1	0	0	1	1	0	0	1	0	1	1	1	1	0	1	1	1	1	1	1	1	0	1	0	1	1	1	1	1	1
NM_014923.2	IOH44828	fibronectin type III domain containing 3A (FNDC3A), transcript variant 2	4167.66	0.736842	42	0	0	0	0	1	1	1	0	0	1	1	1	1	1	1	0	0	1	1	0	0	1	0	1	1	1	1	0	1	1	1	1	1	0	1	1	1	1	1	1	1	1	1	1
BC060773.1	IOH29187	SRY (sex determining region Y)-box 5 (SOX5)	4161.29	0.701754	40	0	0	1	0	1	1	1	0	1	0	0	0	1	0	1	0	0	1	0	0	1	1	0	1	1	1	1	0	1	1	1	1	0	1	1	1	1	1	1	1	1	1	1	1
NM_018328.1	IOH12893	methyl-CpG binding domain protein 5 (MBD5)	4140.24	0.807018	46	0	0	0	0	1	1	1	0	0	1	1	0	1	1	1	1	0	1	1	0	0	1	0	1	1	1	1	1	1	1	1	1	1	1	1	1	1	1	1	1	1	1	1	1
BC027951.1	IOH11889	Cas scaffolding protein family member 4	4137.01	0.754386	43	0	0	0	0	1	1	1	1	0	1	1	0	1	1	1	0	0	1	0	0	0	1	0	1	1	1	1	0	1	1	1	1	1	1	1	1	1	1	1	1	1	1	1	1
BC014452.1	IOH14883	cDNA clone IMAGE:4903661, complete cds	4130.75	0.736842	42	0	0	1	0	1	0	0	0	0	1	0	0	1	1	1	1	0	1	1	0	0	1	0	1	1	1	1	0	1	1	1	1	1	1	1	1	1	1	1	1	1	1	1	1
NM_015532.2	IOH12446	glutamate receptor, ionotropic, N-methyl D-aspartate-like 1A (GRINL1A), transcript variant 1	4127.18	0.754386	43	0	0	1	0	1	1	1	1	1	1	1	0	0	1	1	1	0	1	0	1	0	1	0	0	1	1	1	0	1	1	1	1	1	1	0	1	1	1	1	1	1	1	1	1
BC027729.1	IOH14530	tetra-peptide repeat homeobox-like (TPRXL)	4119.47	0.684211	39	0	1	0	0	1	0	0	1	0	1	0	0	1	0	1	0	0	1	0	0	0	0	0	1	1	1	1	0	1	1	1	1	1	1	1	1	1	1	1	0	1	1	1	1
NM_005659.1	IOH4744	ubiquitin fusion degradation 1 like (yeast) (UFD1L), transcript variant 1, mRNA.	4109.56	0.701754	40	0	0	1	0	1	1	1	1	1	1	1	0	1	1	1	1	0	1	1	0	0	1	0	1	0	1	1	0	1	0	0	1	1	1	1	1	1	0	0	1	1	1	1	1
NM_019070.1	IOH5264	DEAD (Asp-Glu-Ala-Asp) box polypeptide 49 (DDX49)	4107.29	0.789474	45	0	0	1	0	1	1	1	1	1	1	1	0	1	1	1	1	0	1	1	0	0	0	0	1	1	1	1	1	1	1	1	1	1	0	0	1	1	1	1	1	1	1	1	1
BC007852.1		Serine/threonine-protein kinase 25	4105.5	0.701754	40	0	0	1	0	1	1	1	1	1	1	1	0	1	1	1	0	0	1	1	0	0	1	0	1	1	1	0	0	1	1	0	1	1	1	1	1	1	1	0	1	1	0	0	1
BC003065.1		Cell division protein kinase 2	4090.44	0.77193	44	0	0	0	0	1	1	1	1	0	1	1	0	1	1	0	0	0	1	1	0	0	1	0	1	1	1	1	1	1	1	1	1	1	1	1	1	1	1	1	1	1	1	1	1
NM_016564.1	IOH22629	cell cycle exit and neuronal differentiation 1 (CEND1)	4066.15	0.666667	38	0	0	0	0	1	1	1	0	0	1	1	0	1	1	1	1	0	1	1	0	0	1	0	1	1	1	1	1	1	1	1	1	1	1	0	1	1	0	0	1	0	1	1	0
BC001247.1	IOH3075	LIM domain and actin-binding protein 1	4064.16	0.789474	45	0	0	1	1	1	1	1	0	1	1	0	0	1	1	1	1	0	1	1	0	0	1	0	1	1	1	1	1	1	1	1	1	1	1	1	1	1	1	0	1	1	1	1	1
NM_152328.3	IOH26952	adenylosuccinate synthase like 1 (ADSSL1), transcript variant 2	4054.32	0.666667	38	0	0	1	0	1	1	1	1	1	0	0	0	0	1	1	1	0	1	1	0	0	1	0	1	1	1	1	0	0	1	1	1	0	0	1	1	1	1	1	1	1	1	1	1
NM_022776.3	IOH40437	oxysterol binding protein-like 11 (OSBPL11)	4052.74	0.77193	44	0	0	0	1	1	1	1	0	0	1	1	0	1	1	1	0	0	1	1	0	0	1	0	1	1	1	1	0	1	0	1	1	1	1	1	1	1	1	1	1	1	1	1	1
NM_003981.2	IOH5138	protein regulator of cytokinesis 1 (PRC1), transcript variant 1	4029.54	0.789474	45	0	0	1	0	1	1	1	1	1	1	1	0	1	1	1	1	0	1	0	0	0	1	0	1	1	1	0	0	1	1	1	1	1	1	1	1	1	0	1	1	1	1	1	1
NM_173621.1	IOH43334	chromosome 17 open reading frame 44 (C17orf44)	4028.3	0.684211	39	0	0	0	0	1	0	1	0	0	1	0	0	1	0	1	0	0	1	0	0	0	0	0	1	1	1	1	1	1	1	1	1	1	1	1	1	1	1	1	1	1	1	1	1
BC006105.1	IOH5992	chromosome 6 open reading frame 134 (C6orf134)	4028.17	0.824561	47	0	0	1	0	1	1	1	1	0	1	1	0	1	1	1	1	0	1	1	0	0	1	0	1	1	1	1	1	1	1	1	1	1	1	1	1	1	1	1	1	1	1	1	1
BC000770.1	IOH4688	death inducer-obliterator 1 (DIDO1)	4023.54	0.77193	44	0	0	1	0	1	1	1	1	1	1	0	1	1	1	1	0	0	1	0	0	0	1	0	1	1	1	1	0	1	1	1	1	1	1	1	1	1	1	1	1	1	1	1	1
NM_152259.2	IOH44110	Uncharacterized protein C15orf42	4022.45	0.614035	35	0	0	1	0	0	0	0	0	1	1	0	0	0	0	0	0	0	0	0	0	0	0	0	1	1	1	1	0	1	1	1	1	1	1	1	1	1	1	1	1	1	1	1	1
NM_022822.1	IOH22120	kinesin light chain 2 (KLC2)	4008.18	0.789474	45	0	0	1	0	1	1	1	1	1	1	1	0	1	1	1	0	0	1	1	0	0	1	0	1	1	1	1	1	1	1	1	1	1	1	1	1	1	1	1	1	1	1	1	0
BC051762.1	IOH28838	Uncharacterized protein C20orf96	3999.51	0.824561	47	0	0	1	0	1	1	1	1	0	1	1	0	1	1	1	1	0	1	0	0	0	1	0	1	1	1	1	1	1	1	1	1	1	1	1	1	1	1	1	1	1	1	1	1
XM_374177.2	IOH43615	PREDICTED: Homo sapiens hypothetical LOC389415 (LOC389415)	3992.12	0.754386	43	0	0	1	0	1	1	1	1	1	1	1	0	1	1	1	1	0	1	1	0	0	1	0	1	1	1	1	0	1	1	1	1	0	0	1	1	1	1	1	1	1	0	1	1
NM_022347.1	IOH41552	interferon responsive gene 15 (IFRG15)	3990.92	0.789474	45	0	0	1	0	1	1	1	1	1	1	1	0	1	1	1	1	0	1	1	0	0	1	0	1	1	1	0	0	1	1	1	1	1	1	1	0	1	1	1	1	1	1	1	1
NM_024591.1	IOH13020	chromatin modifying protein 6 (CHMP6)	3979.31	0.789474	45	0	1	1	0	1	1	1	1	0	1	0	0	1	1	1	0	0	1	1	0	0	1	0	1	0	1	1	0	1	1	1	1	1	1	1	1	1	1	1	1	1	1	1	1
NM_020651.2	IOH26519	pellino homolog 1 (Drosophila) (PELI1)	3976.33	0.684211	39	0	0	0	0	1	1	1	0	0	0	0	0	1	1	1	0	0	1	0	0	0	1	0	1	1	1	1	0	1	1	1	1	1	0	1	1	1	1	1	1	1	1	1	1
BC019015.2	IOH12089	mediator complex subunit 29 (MED29)	3968.19	0.614035	35	0	0	0	0	0	1	1	0	0	0	1	0	0	0	1	0	0	1	0	0	0	0	0	0	0	1	1	0	1	1	1	1	1	1	1	1	1	1	1	1	0	1	1	1
NM_006912.3	IOH29584	Ras-like without CAAX 1 (RIT1)	3951.9	0.736842	42	0	0	1	1	1	1	1	0	0	1	0	0	1	1	1	1	0	1	1	0	0	1	0	1	1	1	1	0	1	1	1	1	1	1	1	0	1	0	1	1	1	0	1	1
NM_001182.2	IOH45681	aldehyde dehydrogenase 7 family, member A1 (ALDH7A1)	3930.69	0.789474	45	0	0	1	0	1	1	0	1	0	1	1	0	1	1	1	1	0	1	1	0	0	1	0	1	1	1	1	0	1	1	1	1	1	1	1	1	1	1	1	1	1	1	1	1
NM_014288.2	IOH13691	Centromere protein R	3922.41	0.77193	44	0	0	1	0	1	1	1	1	0	1	0	0	1	1	1	1	0	1	1	0	0	1	0	1	1	1	1	0	1	1	1	1	1	0	1	1	1	1	1	1	1	1	1	1
NM_032641.1	IOH4981	splA/ryanodine receptor domain and SOCS box containing 2 (SPSB2)	3919.95	0.77193	44	0	0	1	1	1	1	1	1	1	1	1	0	1	1	1	1	0	1	1	0	0	1	0	1	1	1	1	0	1	1	1	1	0	1	1	1	1	0	1	1	1	0	1	1
BC014385.1	IOH29333	integrin beta 3 binding protein (beta3-endonexin) (ITGB3BP)	3915.05	0.807018	46	0	0	1	1	1	1	1	1	1	1	0	0	1	1	1	1	0	1	0	0	0	1	0	1	1	1	1	0	1	1	1	1	1	1	1	1	1	1	1	1	1	1	1	1
BC101026.2	IOH63533	Spindle assembly abnormal protein 6 homolog	3909.25	0.736842	42	0	0	1	0	1	1	1	1	1	1	1	0	1	1	1	1	0	1	1	0	0	1	0	1	0	1	1	0	0	1	1	1	1	0	1	1	1	1	1	1	1	1	1	1
BC040946.1	IOH26289	CWC15 homolog (S. cerevisiae) (HSPC148)	3889.13	0.736842	42	0	0	1	0	1	1	1	0	0	0	0	0	1	1	1	0	0	1	1	0	0	1	0	1	1	1	1	1	1	1	0	1	1	1	1	1	1	1	1	1	1	1	1	1
BC002921.2	IOH6311	p21(CDKN1A)-activated kinase 4 (PAK4)	3888.05	0.789474	45	0	0	1	1	1	1	1	1	1	1	0	0	1	1	1	1	0	1	1	0	0	1	0	1	1	1	1	0	1	1	1	1	0	0	1	1	1	1	1	1	1	1	1	1
NM_006374.2	IOH6735	serine/threonine kinase 25 (STE20 homolog, yeast) (STK25)	3887.9	0.684211	39	0	0	1	0	1	1	1	1	1	1	1	0	1	1	1	0	0	1	1	0	0	1	0	1	1	1	0	0	1	1	0	1	1	1	1	0	1	1	1	1	1	0	0	1
BC012746.1	IOH14565	mesoderm development candidate 2 (MESDC2)	3884.07	0.701754	40	0	0	1	0	1	1	1	1	0	1	1	0	1	1	1	1	0	1	0	0	0	1	0	1	1	1	1	0	0	1	1	1	1	1	1	1	1	0	1	0	1	1	1	1
NM_032514.2	IOH10043	microtubule-associated protein 1 light chain 3 alpha (MAP1LC3A), transcript variant 1	3874.1	0.807018	46	0	0	1	0	1	1	1	1	1	1	1	0	1	1	1	1	0	1	1	0	0	1	0	1	1	1	1	0	1	1	1	1	1	1	1	1	1	1	1	1	1	1	1	1
NM_144664.3	IOH45592	Protein FAM76B	3871.11	0.789474	45	0	0	1	1	1	1	1	1	1	1	1	0	1	1	0	0	0	1	1	0	0	1	0	1	1	1	1	0	1	1	1	1	1	1	1	1	1	0	1	1	1	1	1	1
BC009779.1	IOH12227	outer dense fiber of sperm tails 2-like (ODF2L)	3841.57	0.719298	41	0	0	0	0	1	1	0	0	0	1	1	0	1	1	1	1	0	1	1	0	0	1	0	1	1	0	1	0	1	1	1	1	1	1	1	1	1	1	1	1	1	0	1	1
NM_205853.1	IOH43061	musculoskeletal, embryonic nuclear protein 1 (MUSTN1)	3818.07	0.719298	41	0	0	1	1	1	1	1	0	1	0	0	0	1	1	1	0	0	1	1	0	0	1	0	1	1	1	1	0	1	1	1	1	0	0	1	1	1	1	1	1	1	1	1	1
BC066958.1	IOH61486	splicing factor, arginine/serine-rich 2, mRNA (cDNA clone MGC:87440 IMAGE:4837392), complete cds	3810.28	0.719298	41	0	0	1	0	1	1	1	1	0	0	1	0	1	1	1	1	0	1	1	0	0	1	0	1	1	1	1	0	1	1	1	1	1	0	1	1	1	1	1	1	1	1	1	1
NM_016508.2	IOH21339	Cyclin-dependent kinase-like 3	3810.21	0.842105	48	0	0	1	0	1	1	1	1	1	1	1	0	1	1	1	0	0	1	1	0	0	1	0	1	1	1	1	1	1	1	1	1	1	1	1	1	1	1	1	1	1	1	1	1
NM_030636.1	IOH39935	Endonuclease/exonuclease/phosphatase family domain-containing protein 1	3798.48	0.701754	40	0	0	1	0	1	1	1	1	1	1	1	0	1	1	1	0	0	1	1	0	0	1	0	1	0	1	1	0	1	1	1	1	1	1	1	0	1	1	1	1	0	1	1	1
NM_003668.2	IOH28010	mitogen-activated protein kinase-activated protein kinase 5 (MAPKAPK5), transcript variant 1	3792.84	0.736842	42	0	0	1	0	1	1	1	1	1	1	0	0	1	0	1	0	0	0	1	0	0	1	0	1	1	1	1	0	1	1	1	1	1	1	1	1	1	1	1	1	0	1	1	1
BC036723.1	IOH22599	Fc fragment of IgG, low affinity IIIa, receptor (CD16a) (FCGR3A)	3792.64	0.719298	41	0	0	1	0	1	1	1	1	0	0	0	0	0	0	1	1	0	1	1	0	0	0	0	0	1	1	1	1	1	1	1	1	1	1	1	1	1	1	1	1	1	1	1	1
NM_005335.3	IOH57089	Hematopoietic lineage cell-specific protein	3788.2	0.719298	41	0	0	1	0	1	1	1	1	1	0	0	0	1	1	1	1	0	1	1	0	0	1	0	1	1	1	1	0	1	1	1	1	0	1	1	0	1	0	1	1	1	1	1	1
BC019315.1	IOH27769	N-acetylneuraminic acid synthase (sialic acid synthase) (NANS)	3788.09	0.701754	40	0	0	0	0	1	1	0	0	0	1	1	0	1	1	1	0	0	1	1	0	0	1	0	1	1	1	1	0	1	1	1	1	1	0	0	1	1	0	1	1	1	1	1	1
P3049		v-abl Abelson murine leukemia viral oncogene homolog 1 (ABL1), transcript variant a; see catalog number for detailed information on wild-type or point mutant status	3785.81	0.701754	40	0	0	1	0	1	1	1	1	0	1	1	0	1	1	1	0	0	1	1	0	0	1	0	1	1	1	0	0	1	1	0	1	1	1	1	1	1	0	1	0	1	1	1	0
BC004236.2	IOH3887	ubiquitin-conjugating enzyme E2S (UBE2S)	3780.61	0.631579	36	0	0	1	0	1	0	1	0	0	0	0	0	1	1	1	0	0	1	1	0	0	0	0	1	1	1	1	0	1	0	1	1	1	1	0	1	1	0	1	1	1	1	1	1
BC024254.1	IOH13735	abl-interactor 1 (ABI1)	3776.89	0.754386	43	0	0	1	0	1	1	1	1	1	1	0	0	1	1	1	1	0	1	1	0	0	1	0	1	1	1	0	0	1	1	1	1	1	1	1	1	1	0	1	1	0	1	1	1
BC029524.1	IOH22562	Coiled-coil domain-containing protein 46	3773.97	0.736842	42	0	0	0	0	1	1	0	1	0	1	1	0	1	1	1	1	0	1	1	0	0	1	0	1	1	1	1	0	1	1	1	1	1	0	1	1	1	0	1	1	1	1	1	1
BC006375.2	IOH6475	dual-specificity tyrosine-(Y)-phosphorylation regulated kinase 2 (DYRK2)	3764.26	0.719298	41	0	0	0	0	1	1	1	0	1	1	1	0	1	1	1	0	0	1	0	0	0	0	0	1	1	1	1	0	1	1	1	1	1	1	1	1	1	0	1	1	1	1	1	1
NM_032636.2	IOH4088	proline/serine-rich coiled-coil 1 (PSRC1), transcript variant 1	3764.15	0.736842	42	0	0	1	0	1	1	1	1	1	1	1	0	1	1	1	0	0	1	1	0	0	1	0	1	1	1	1	0	1	1	1	1	1	0	0	1	1	0	1	1	1	1	1	1
NM_001290.1	IOH23054	LIM domain binding 2 (LDB2)	3760.31	0.754386	43	0	0	0	0	1	1	1	1	0	1	1	0	1	1	1	0	0	1	1	0	0	1	0	1	1	1	1	0	1	1	1	1	1	1	1	1	1	0	0	1	1	1	1	1
BC036123.1	IOH27289	stromal membrane-associated protein 1 (SMAP1)	3755.13	0.754386	43	0	0	1	0	1	1	1	0	1	1	0	0	1	1	1	1	0	1	1	0	0	1	0	1	0	1	1	0	1	1	1	1	1	1	1	1	1	0	1	1	1	1	1	1
BC003549.1	IOH4987	enoyl Coenzyme A hydratase domain containing 1 (ECHDC1)	3749.4	0.754386	43	0	0	1	0	1	1	1	1	1	1	1	0	1	1	1	1	0	1	1	0	0	1	0	1	1	1	0	0	1	1	0	1	1	1	1	1	1	1	0	1	1	1	1	1
NM_138333.1	IOH10239	family with sequence similarity 122A (FAM122A)	3739.01	0.719298	41	0	0	1	0	1	1	1	1	1	1	1	0	1	1	1	1	0	1	0	0	0	1	0	0	1	1	1	0	1	1	1	1	1	1	0	1	1	0	1	1	1	0	1	1
BC060767.1	IOH29188	centaurin, beta 2 (CENTB2)	3738.38	0.631579	36	0	0	1	1	1	0	0	0	1	1	0	0	0	1	1	0	1	1	0	0	0	1	0	1	0	1	1	0	0	1	1	1	0	1	1	1	1	0	1	1	1	1	1	1
PV4333		BR serine/threonine kinase 1	3724.85	0.684211	39	0	0	0	0	1	1	1	1	0	1	1	0	0	1	1	0	0	1	0	0	0	1	0	1	1	1	1	0	1	1	1	1	1	0	1	1	1	1	1	1	1	1	1	0
BC022429.1	IOH23036	Lyrm7 homolog (mouse) (LYRM7)	3721.96	0.649123	37	0	0	0	0	1	1	1	0	0	1	0	0	0	1	1	0	0	1	0	0	0	1	0	1	1	1	1	0	1	1	1	1	1	0	1	1	1	1	1	1	1	1	1	1
BC022257.1	IOH12061	lectin, galactoside-binding, soluble, 14 (LGALS14)	3711.42	0.754386	43	0	0	0	0	1	1	1	0	0	1	1	0	1	1	1	1	0	1	0	0	0	1	0	1	1	1	1	0	1	1	1	1	1	1	1	1	1	1	1	1	1	1	1	1
BC005982.1	IOH7502	peptidylprolyl isomerase A (cyclophilin A) (PPIA)	3705.58	0.77193	44	0	0	1	0	1	1	1	1	1	1	0	0	1	1	1	0	0	1	1	0	0	1	0	1	1	1	1	0	1	1	1	1	1	1	1	1	1	1	1	1	1	1	1	1
NM_018297.2	IOH6809	N-glycanase 1 (NGLY1)	3693.02	0.684211	39	0	0	0	0	1	1	1	0	0	1	0	0	1	1	0	0	0	1	0	0	0	1	0	1	1	1	1	0	1	1	1	1	1	1	1	1	1	1	0	1	1	1	1	1
BC005248.1	IOH7358	eukaryotic translation initiation factor 1A, Y-linked (EIF1AY)	3674.99	0.736842	42	0	0	1	0	1	1	1	1	0	1	1	0	1	1	1	0	0	1	1	0	0	1	0	1	1	1	0	0	1	1	0	1	1	1	1	1	1	0	1	1	1	1	1	1
BC032851.2	IOH27168	Cas-Br-M (murine) ecotropic retroviral transforming sequence b (CBLB)	3666.75	0.701754	40	0	1	0	0	1	1	1	1	0	1	1	0	1	0	1	0	0	1	1	0	0	0	0	1	1	1	1	0	1	1	1	1	0	1	1	1	1	1	1	1	1	1	0	0
NM_015939.2	IOH3137	tRNA methyltransferase 6 homolog (S. cerevisiae) (TRMT6)	3665.01	0.684211	39	0	0	0	1	1	1	1	1	0	1	0	0	1	1	1	0	0	1	1	0	0	1	0	0	1	1	0	0	1	1	0	1	1	1	1	0	1	1	1	1	1	1	1	1
NM_007005.3	IOH52787	Transducin-like enhancer protein 4	3664.64	0.649123	37	0	0	0	0	1	1	1	1	0	0	0	0	1	1	0	0	0	0	1	0	0	1	0	1	0	1	1	1	1	1	1	1	1	1	1	1	1	0	1	1	1	1	1	1
NM_001001550.1	IOH13204	growth factor receptor-bound protein 10 (GRB10), transcript variant 3	3663.75	0.736842	42	0	0	0	0	1	1	0	1	0	1	0	0	1	1	1	0	0	1	1	0	0	1	0	1	1	1	1	1	1	1	1	1	1	1	1	1	1	1	1	1	1	1	1	1
BC032347.1	IOH21704	chromosome 8 open reading frame 59 (C8orf59)	3657.96	0.789474	45	0	0	1	0	1	1	1	1	1	1	1	1	1	1	1	0	0	1	1	0	0	1	0	1	1	1	1	1	1	1	1	1	1	0	1	1	1	0	1	1	1	0	1	1
BC059405.1	IOH40433	Transducin-like enhancer protein 4	3650.28	0.736842	42	0	0	0	1	1	1	1	1	0	1	0	0	0	1	1	0	0	1	1	0	0	1	0	1	1	1	1	0	0	1	1	1	1	1	1	1	1	1	1	1	1	1	1	1
BC060818.1	IOH29248	synaptosomal-associated protein, 91kDa homolog (mouse) (SNAP91)	3645.84	0.631579	36	0	0	1	0	0	1	1	0	1	1	0	0	1	1	1	0	0	1	1	0	0	1	0	1	1	1	1	0	1	1	0	1	0	1	0	1	1	0	0	1	1	1	1	0
BC038838.1	IOH28760	Proline-rich protein 16	3642.86	0.614035	35	0	0	1	0	1	1	1	1	1	1	1	0	1	1	1	1	0	1	1	0	0	1	0	1	0	1	0	0	1	1	1	1	1	0	0	0	1	0	1	1	0	1	1	1
NM_030881.2	IOH1750	DEAD (Asp-Glu-Ala-Asp) box polypeptide 17 (DDX17), transcript variant 2	3641.03	0.789474	45	0	0	1	0	1	1	1	0	0	1	1	0	1	1	1	1	0	1	1	0	0	1	0	1	1	1	1	1	1	1	1	1	1	0	1	1	1	1	1	1	1	1	1	1
BC094719.1	IOH62673	Rho GTPase-activating protein 12	3639.46	0.77193	44	0	0	0	0	1	1	1	1	0	1	1	0	1	1	1	1	0	1	1	0	0	1	0	1	1	1	1	0	1	1	1	1	1	1	1	1	1	0	1	1	1	1	1	1
BC059362.1	IOH29173	Ral guanine nucleotide dissociation stimulator	3631.46	0.684211	39	0	0	1	0	0	0	1	1	1	0	1	0	1	1	1	1	0	1	0	0	0	1	0	1	0	1	1	0	0	1	1	0	0	1	1	1	1	1	1	1	1	1	1	1
NM_139016.2	IOH27635	chromosome 20 open reading frame 198 (C20orf198)	3625.04	0.736842	42	0	0	0	0	1	1	1	1	0	1	0	0	1	1	1	1	0	1	1	0	0	1	0	1	1	1	1	0	1	1	1	1	1	0	1	0	1	1	1	1	1	1	1	1
NM_018956.2	IOH11209	chromosome 9 open reading frame 9 (C9orf9)	3621.71	0.666667	38	0	0	0	0	0	0	0	1	0	1	0	0	1	1	1	0	0	1	0	0	0	1	0	1	1	1	1	0	1	1	1	1	1	1	1	0	1	1	1	1	1	1	1	1
NM_007006.1	IOH4064	nudix (nucleoside diphosphate linked moiety X)-type motif 21 (NUDT21)	3615.75	0.824561	47	0	0	1	0	1	1	1	1	1	1	1	0	1	1	1	0	0	1	1	0	0	1	0	1	1	1	1	0	1	1	1	1	1	1	1	1	1	1	1	1	1	1	1	1
BC040949.1	IOH26268	myocyte enhancer factor 2D (MEF2D)	3613.69	0.666667	38	0	0	1	0	1	1	1	0	1	1	0	0	1	0	1	0	0	1	1	0	0	1	0	1	1	1	1	0	1	1	1	1	1	0	0	1	1	0	1	0	1	1	1	1
NM_004701.2	IOH41218	cyclin B2 (CCNB2)	3610.9	0.789474	45	0	0	1	0	1	1	1	1	1	1	0	0	1	1	1	0	0	1	0	0	0	1	0	1	1	1	1	1	1	1	1	1	1	0	1	1	1	1	1	1	1	1	1	1
BC017114.1	IOH9995	oligonucleotide/oligosaccharide-binding fold containing 2A (OBFC2A)	3608.78	0.789474	45	0	0	1	0	1	1	1	1	1	1	1	0	1	1	1	0	0	1	1	0	0	1	0	1	1	1	1	0	1	1	1	1	1	1	1	1	1	1	1	1	1	1	0	1
BC006423.1		Serine/threonine-protein kinase 6	3602.39	0.754386	43	0	0	1	0	1	1	1	1	0	1	1	0	1	1	1	0	0	1	0	0	0	1	0	1	1	1	0	0	1	1	1	1	1	1	1	1	1	1	1	1	1	1	1	1
NM_018457.1	IOH23026	proline rich 13 (PRR13), transcript variant 2	3600.48	0.701754	40	0	1	0	0	1	1	1	0	0	0	1	0	1	1	1	0	0	1	1	0	0	1	0	1	1	1	1	0	1	1	1	1	0	1	0	1	1	1	1	1	1	1	1	1
NM_032548.2	IOH45815	ankyrin repeat and BTB (POZ) domain containing 1 (ABTB1), transcript variant 1	3592.61	0.807018	46	0	0	0	0	1	1	1	1	1	1	1	0	1	1	1	1	1	1	1	0	0	1	0	1	1	1	1	0	1	1	1	1	1	1	1	1	1	0	1	1	1	1	1	1
NM_022474.2	IOH44175	membrane protein, palmitoylated 5 (MAGUK p55 subfamily member 5) (MPP5)	3589.82	0.649123	37	0	0	0	1	1	1	1	0	0	0	0	0	1	1	1	0	1	1	0	0	0	0	0	1	0	1	1	0	1	1	1	1	1	1	1	0	1	0	1	1	1	1	1	1
NM_018282.1	IOH12080	Paraspeckle component 1	3577.96	0.666667	38	0	0	0	0	1	1	1	1	0	0	0	0	1	1	1	0	0	1	1	0	0	1	0	0	1	1	1	1	1	1	1	1	0	1	1	1	1	0	1	1	1	0	1	1
NM_153822.1	IOH41107	proteasome (prosome, macropain) 26S subunit, non-ATPase, 4 (PSMD4), transcript variant 2	3577.45	0.666667	38	0	0	0	0	1	1	0	1	0	1	0	0	1	1	1	0	0	1	1	0	0	0	0	1	1	1	1	0	1	1	1	0	1	1	1	1	1	1	1	1	0	1	0	1
BC001280.1	IOH21165	Serine/threonine-protein kinase 6	3570.43	0.754386	43	0	0	1	0	1	1	1	1	0	1	1	0	1	1	1	0	0	1	1	0	0	1	0	1	1	1	1	0	1	1	1	1	1	1	1	0	1	0	1	1	1	1	1	1
NM_006428.3	IOH40570	mitochondrial ribosomal protein L28 (MRPL28), nuclear gene encoding mitochondrial protein	3567.68	0.684211	39	0	0	0	0	1	1	1	0	0	1	1	0	0	0	1	0	0	1	1	0	0	1	0	1	1	1	1	0	1	1	1	1	1	1	1	1	1	1	1	1	1	1	0	1
BC002559.1	IOH4053	YTH domain family, member 2 (YTHDF2)	3549.09	0.77193	44	0	0	1	0	1	1	1	0	1	1	0	0	1	1	1	0	0	1	1	0	0	1	0	0	1	1	1	1	1	1	1	1	1	1	1	1	1	1	1	1	1	1	1	1
NM_007080.1	IOH10074	LSM6 homolog, U6 small nuclear RNA associated (S. cerevisiae) (LSM6)	3547.01	0.684211	39	0	0	0	1	1	1	1	1	0	1	0	0	1	1	1	0	0	1	0	0	0	1	0	1	1	1	1	0	1	1	1	1	1	0	1	1	1	0	1	1	1	0	1	1
NM_020467.2	IOH3994	small trans-membrane and glycosylated protein (LOC57228), transcript variant 2	3546.04	0.684211	39	0	0	0	1	1	1	0	1	0	1	1	1	1	1	1	0	0	1	1	0	0	1	0	1	1	1	0	0	1	1	1	1	1	1	0	0	1	0	1	1	1	1	1	1
NM_022101.1	IOH27781	chromosome X open reading frame 56 (CXorf56)	3540.98	0.754386	43	0	0	1	0	0	1	1	1	0	1	1	0	1	1	1	1	0	1	1	0	0	1	0	1	1	1	1	0	1	1	1	1	1	0	1	1	1	1	1	1	1	1	1	1
BC050377.1	IOH26671	Serine/threonine-protein kinase PAK 1	3538.97	0.684211	39	0	0	1	0	1	1	1	1	1	1	1	0	1	1	1	0	0	1	0	0	0	1	0	1	0	1	1	0	1	1	1	0	0	1	1	1	1	1	1	1	1	1	1	0
BC051885.1	IOH27082	chromosome 14 open reading frame 106 (C14orf106)	3532.68	0.666667	38	0	0	0	0	1	0	1	1	0	1	1	0	1	1	1	0	0	1	1	0	0	1	0	1	1	1	1	0	1	1	1	0	1	0	1	0	1	1	1	1	1	1	1	1
NM_004922.2	IOH38664	SEC24 related gene family, member C (S. cerevisiae) (SEC24C), transcript variant 1	3501.27	0.736842	42	0	0	1	0	0	1	1	0	1	1	1	0	0	1	1	0	0	1	1	0	0	0	0	1	1	1	1	0	1	1	1	1	1	1	1	1	1	1	1	1	1	1	1	1
BC030711.2	IOH22414	Aprataxin and PNK-like factor	3498.3	0.649123	37	0	0	1	0	1	1	1	0	1	1	0	0	0	1	1	1	0	1	0	0	0	1	0	1	1	0	0	0	1	1	1	1	1	1	1	1	1	0	0	1	1	0	1	1
NM_005825.2	IOH39691	RAS guanyl releasing protein 2 (calcium and DAG-regulated) (RASGRP2), transcript variant 1	3497.88	0.701754	40	0	0	0	0	1	1	1	1	0	0	0	0	0	1	1	0	0	1	0	0	0	1	0	1	1	1	1	1	1	1	1	1	1	0	1	1	1	1	1	1	1	1	1	1
BC019039.2	IOH46089	Regulator of G-protein signaling 3	3495.85	0.684211	39	0	0	0	0	0	1	1	0	0	1	1	0	1	1	1	0	0	1	1	0	0	0	0	1	1	1	1	0	1	1	0	1	1	1	1	1	1	0	1	1	1	1	1	1
BC099658.1	IOH63280	Oral-facial-digital syndrome 1 protein (Protein 71-7A) [Source:UniProtKB/Swiss-Prot;Acc:O75665]	3495.32	0.719298	41	0	0	0	0	1	1	1	1	0	1	0	0	1	1	1	0	0	1	0	0	0	1	0	1	1	1	1	0	1	1	1	1	1	1	0	1	1	1	1	1	1	1	1	1
NM_005565.2	IOH11014	lymphocyte cytosolic protein 2 (SH2 domain containing leukocyte protein of 76kDa) (LCP2)	3495.25	0.754386	43	0	0	1	0	1	1	1	1	0	1	0	1	1	1	1	0	0	1	1	0	0	1	0	1	0	1	1	1	1	1	1	1	1	0	1	1	1	0	1	1	1	1	1	1
BC014975.1	IOH14285	family with sequence similarity 136, member A (FAM136A)	3494.17	0.701754	40	0	0	1	0	1	1	0	1	1	1	0	0	1	1	0	0	0	1	1	0	0	1	0	1	1	1	1	0	1	1	1	1	0	1	1	1	1	0	1	1	1	0	1	1
BC018764.1	IOH13523	KIAA1217 (KIAA1217)	3493.18	0.789474	45	0	0	1	0	1	1	1	1	1	1	1	0	0	1	1	0	0	1	1	0	0	1	0	1	1	1	1	1	1	1	1	1	1	1	1	1	1	1	1	1	1	1	1	1
NM_182612.1	IOH42453	Parkinson disease 7 domain containing 1 (PDDC1)	3493.07	0.842105	48	0	0	1	0	1	1	1	1	0	1	1	0	1	1	1	1	0	1	1	0	0	1	0	1	1	1	1	1	1	1	1	1	1	1	1	1	1	1	1	1	1	1	1	1
NM_138730.1	IOH9857	high mobility group nucleosomal binding domain 3 (HMGN3), transcript variant 2	3479.41	0.736842	42	0	0	1	0	1	1	1	1	1	1	0	0	1	1	1	0	0	1	1	0	0	1	0	0	1	1	1	0	1	1	1	1	1	0	1	1	1	1	1	1	1	0	1	1
BC017918.1	IOH12709	chromosome 9 open reading frame 19 (C9orf19)	3479.24	0.754386	43	0	0	0	0	1	1	1	1	0	1	1	0	1	1	0	1	0	1	1	0	0	1	0	1	1	1	1	0	1	1	1	1	1	1	1	1	1	1	1	1	1	1	0	1
NM_002898.1	IOH11398	RNA binding motif, single stranded interacting protein 2 (RBMS2)	3471.25	0.736842	42	0	0	1	0	1	1	1	1	0	0	0	0	1	1	1	0	0	1	1	0	0	1	0	1	1	1	1	0	1	1	1	0	1	1	1	1	1	1	1	1	1	1	1	1
NM_014716.2	IOH60017	ARFGAP with coiled-coil, ANK repeat and PH domain-containing protein 1	3466.66	0.701754	40	0	0	1	0	1	0	1	1	1	1	0	0	1	1	1	0	0	1	1	0	0	1	0	1	1	1	1	0	0	1	1	1	0	1	1	1	1	1	1	1	1	1	1	1
NM_153645.1	IOH11663	nucleoporin 50kDa (NUP50), transcript variant 3	3457.26	0.719298	41	0	0	1	0	1	1	0	0	1	1	0	0	1	1	1	1	0	1	0	0	0	1	0	1	1	1	1	0	1	1	1	1	0	1	1	1	1	1	1	1	1	1	1	1
NM_170676.2	IOH26710	Meis homeobox 2 (MEIS2), transcript variant d	3446.93	0.736842	42	0	0	1	0	1	1	1	1	1	0	1	0	1	1	1	1	0	1	1	0	0	1	0	1	1	1	1	0	1	1	1	1	0	1	0	1	1	0	1	0	1	1	1	0
NM_017451.1	IOH42068	BAI1-associated protein 2 (BAIAP2), transcript variant 2	3442.07	0.719298	41	0	0	1	1	1	1	1	1	1	1	1	0	1	1	1	1	0	1	0	0	0	1	0	1	1	1	1	0	1	1	0	1	1	0	1	0	1	1	1	1	1	1	1	1
NM_032140.1	IOH6250	chromosome 16 open reading frame 48 (C16orf48)	3437.11	0.719298	41	0	0	1	0	1	1	1	1	1	1	1	0	1	1	1	0	0	0	1	0	0	1	0	1	1	1	1	0	1	1	1	1	0	1	1	1	1	1	0	1	1	1	1	1
NM_004838.2	IOH12410	homer homolog 3 (Drosophila) (HOMER3)	3435.26	0.754386	43	0	0	0	0	0	0	1	1	0	1	1	0	1	1	1	1	0	1	1	0	0	1	0	1	1	1	1	1	1	1	1	1	1	1	1	1	1	1	1	1	1	1	1	1
NM_000723.3	IOH39502	calcium channel, voltage-dependent, beta 1 subunit (CACNB1), transcript variant 1	3433.23	0.701754	40	0	0	0	0	1	1	1	1	0	1	0	0	1	1	1	0	0	1	1	0	0	1	0	1	0	1	1	0	1	1	1	1	1	1	1	1	1	0	1	1	1	1	1	1
NM_181714.1	IOH26433	Leber congenital amaurosis 5 (LCA5)	3417.46	0.77193	44	0	0	1	0	1	1	1	1	1	1	1	0	1	1	1	0	0	1	0	0	0	1	0	1	1	1	0	1	1	1	1	1	1	1	1	1	1	0	1	1	1	1	1	1
NM_003161.1	IOH29907	ribosomal protein S6 kinase, 70kDa, polypeptide 1 (RPS6KB1)	3412.9	0.719298	41	0	0	1	0	1	1	1	1	1	1	1	0	1	1	1	1	0	1	0	0	0	1	0	1	1	1	0	0	0	1	1	1	1	1	1	0	1	1	1	1	1	1	1	1
BC008902.2	IOH46064	GRIP and coiled-coil domain-containing protein 1	3404.45	0.719298	41	0	0	1	0	1	1	1	0	1	1	0	0	1	1	1	1	0	1	1	0	0	1	0	1	1	1	1	0	1	1	1	1	1	1	0	1	1	0	0	1	1	1	1	1
BC011804.2	IOH14438	chromosome 1 open reading frame 165 (C1orf165)	3401.96	0.719298	41	0	0	1	0	1	1	1	1	0	0	1	0	1	1	1	1	0	1	1	0	0	1	0	1	1	1	1	0	1	1	1	1	1	0	1	0	1	0	1	1	1	1	1	1
BC050551.1	IOH26948	BCL2-associated athanogene 5 (BAG5)	3401.46	0.649123	37	0	0	1	0	1	1	1	0	1	0	1	0	1	1	1	1	0	1	1	0	0	0	0	1	1	1	1	0	1	1	0	1	0	1	1	0	1	0	1	0	1	0	1	1
BC035021.1	IOH27103	membrane-associated ring finger (C3HC4) 10 (RNF190)	3396.64	0.736842	42	0	0	1	0	1	1	1	0	1	1	0	1	1	1	1	1	0	1	0	0	0	1	0	0	0	1	1	1	1	1	1	1	1	1	1	1	1	0	1	1	0	1	1	1
NM_022337.1	IOH10104	RAB38, member RAS oncogene family (RAB38)	3388.56	0.631579	36	0	0	0	0	1	1	1	0	0	0	0	0	1	1	1	0	0	1	1	0	0	1	0	1	0	1	1	0	1	1	1	1	1	0	1	1	1	0	1	1	1	1	1	1
BC033708.1	IOH21753	Ral GEF with PH domain and SH3 binding motif 1 (RALGPS1)	3379.04	0.807018	46	0	0	0	0	1	1	1	1	1	1	1	0	1	1	1	1	0	1	1	0	0	1	0	1	1	1	1	1	1	1	1	1	1	0	1	1	1	1	1	1	1	1	1	1
NM_002861.1	IOH3644	phosphate cytidylyltransferase 2, ethanolamine (PCYT2)	3375.32	0.649123	37	0	0	0	0	1	1	1	1	0	0	1	0	1	1	0	0	0	1	0	0	0	1	0	1	0	1	1	0	1	1	1	1	1	1	1	1	1	0	0	1	0	1	1	1
BC020726.1	IOH12969	sciellin (SCEL)	3374.37	0.684211	39	0	0	1	0	1	1	1	1	0	1	1	0	1	1	1	0	0	1	1	0	0	1	0	1	1	1	1	0	1	1	1	1	0	1	1	1	1	1	1	1	1	0	1	1
NM_016310.2	IOH12571	polymerase (RNA) III (DNA directed) polypeptide K, 12.3 kDa (POLR3K)	3370.47	0.649123	37	0	0	1	0	0	0	0	1	1	1	0	0	1	0	1	0	0	0	1	0	0	1	0	1	1	1	1	0	1	1	1	1	1	1	1	1	1	1	1	1	1	1	1	1
NM_173822.1	IOH27491	family with sequence similarity 126, member B (FAM126B)	3355.32	0.77193	44	0	0	1	0	1	1	1	1	1	1	0	0	1	1	1	0	0	1	1	0	0	1	0	1	1	1	1	0	1	1	1	1	1	0	1	1	1	1	1	1	1	1	1	1
BC032124.1	IOH23093	bromodomain containing 3 (BRD3)	3345.92	0.701754	40	0	0	0	0	1	0	1	0	0	1	0	0	1	1	1	0	0	1	1	0	0	1	0	1	1	1	1	0	1	1	1	1	1	1	1	0	1	1	1	1	1	1	1	1
BC052805.1	IOH29378	erythrocyte membrane protein band 4.9 (dematin) (EPB49)	3344.87	0.736842	42	0	0	0	1	1	1	1	1	0	1	1	0	1	1	1	0	0	1	0	0	0	1	0	1	0	1	1	1	1	1	1	1	1	0	1	1	1	1	1	1	1	1	1	1
BC039832.1	IOH26274	periphilin 1 (PPHLN1)	3339.39	0.719298	41	0	0	1	0	1	0	1	0	1	1	1	0	1	1	1	0	0	1	0	0	0	1	0	1	1	1	1	0	1	1	1	1	1	1	1	1	1	1	1	1	1	1	0	1
NM_152653.1	IOH13176	ubiquitin-conjugating enzyme E2E 2 (UBC4/5 homolog, yeast) (UBE2E2)	3335.49	0.666667	38	0	0	0	0	1	1	1	1	0	0	0	0	1	1	1	0	0	1	1	0	0	1	0	1	0	1	1	0	1	1	1	1	1	1	1	0	1	1	1	1	1	1	1	1
BC000306.1	IOH3456	hydroxyacyl-Coenzyme A dehydrogenase (HADH)	3334.91	0.754386	43	0	0	1	0	1	0	1	0	0	1	0	0	1	1	1	1	0	1	1	0	0	1	0	1	1	1	1	0	1	1	1	1	1	1	1	1	1	1	1	1	1	1	1	1
BC021187.1	IOH10893	DKFZP434K028 protein (DKFZP434K028)	3332.35	0.807018	46	0	0	0	0	1	1	1	1	0	1	1	0	1	1	1	1	0	1	1	0	0	1	0	1	1	1	1	0	1	1	1	1	1	1	1	1	1	1	1	1	1	1	1	1
BC017789.1	IOH13662	cysteine and histidine-rich domain (CHORD)-containing 1 (CHORDC1)	3332.29	0.684211	39	0	0	1	0	1	1	1	0	1	1	0	0	1	1	1	0	0	1	1	0	0	1	0	1	1	1	0	0	1	1	0	1	1	0	1	0	1	1	1	1	1	1	0	1
BC066938.1	IOH40083	DEAD (Asp-Glu-Ala-Asp) box polypeptide 43 (DDX43)	3328.1	0.719298	41	0	0	0	0	1	1	1	0	0	1	1	0	0	1	1	0	0	1	1	0	0	1	0	1	1	1	1	0	1	1	1	1	1	1	1	1	1	1	1	1	1	1	1	1
BC014298.1	IOH13449	PRKR interacting protein 1 (IL11 inducible) (PRKRIP1)	3324.04	0.701754	40	0	0	0	0	1	1	1	1	0	1	1	0	1	1	1	0	0	1	1	0	0	1	0	1	1	1	1	0	1	1	1	1	1	0	1	1	1	0	1	1	1	1	1	1
BC038976.1	IOH28763	Rho GTPase-activating protein 15	3321.48	0.719298	41	0	0	0	0	1	1	0	1	0	1	1	0	1	0	1	0	0	1	0	0	0	1	0	1	1	1	1	0	1	1	1	1	1	1	1	1	1	1	1	1	1	1	1	1
NM_022156.3	IOH39856	dihydrouridine synthase 1-like (S. cerevisiae) (DUS1L)	3302.53	0.736842	42	0	0	0	0	1	1	1	1	0	1	1	0	1	1	1	0	0	1	1	0	0	1	0	1	1	1	1	0	0	1	1	1	1	0	1	1	1	1	1	1	1	1	1	1
NM_175887.2	IOH27336	proline rich 15 (PRR15)	3300.25	0.701754	40	0	0	0	0	1	1	1	0	0	1	0	0	1	1	1	0	0	1	1	0	0	1	0	1	1	1	1	0	1	1	1	1	1	0	1	1	1	0	1	1	1	1	1	1
NM_006621.3	IOH41131	S-adenosylhomocysteine hydrolase-like 1 (AHCYL1)	3292.94	0.719298	41	0	0	1	0	1	1	1	1	1	1	0	0	1	1	0	0	0	0	1	0	0	1	0	0	1	1	1	1	1	1	1	1	1	1	1	1	1	1	1	1	1	1	0	1
BC012472.1	IOH11069	ubiquitin D (UBD)	3292.25	0.701754	40	0	0	1	1	1	1	1	0	1	1	0	0	1	1	1	0	0	1	0	0	0	0	0	1	1	1	1	1	0	1	1	1	0	1	1	1	1	1	1	1	1	1	0	1
NM_001040633.1	IOH61663	protein kinase, AMP-activated, gamma 2 non-catalytic subunit (PRKAG2), transcript variant c, mRNA.	3288.13	0.684211	39	0	0	0	0	1	1	1	0	0	0	0	0	1	1	0	0	0	1	0	0	0	0	0	0	1	1	1	1	1	1	1	1	1	1	1	1	1	1	1	1	1	1	1	1
BC042864.1	IOH26525	SH3-domain GRB2-like 3 (SH3GL3)	3284.36	0.666667	38	0	0	0	0	1	0	0	1	0	1	1	0	0	1	1	1	0	1	1	0	0	1	0	1	1	1	1	0	1	1	1	0	0	0	1	1	1	0	1	1	1	1	1	1
BC064700.1	IOH39815	estrogen-related receptor gamma (ESRRG)	3282.34	0.631579	36	0	0	0	0	1	0	1	0	0	1	0	0	1	1	1	0	0	1	1	0	0	1	0	1	1	1	0	0	1	1	0	1	1	1	1	0	1	1	1	1	1	0	0	1
NM_016303.1	IOH27824	WW domain binding protein 5 (WBP5), transcript variant 1	3275.5	0.649123	37	0	0	1	0	1	0	0	0	1	1	1	0	1	0	0	0	0	1	0	0	0	1	0	1	1	1	1	0	0	1	1	1	1	1	1	0	1	1	1	0	1	1	1	1
BC012997.2	IOH12554	sulfatase 1 (SULF1)	3274.34	0.701754	40	0	0	0	1	1	1	1	0	0	1	1	0	0	0	1	0	0	1	1	0	0	1	0	0	1	1	1	0	1	1	1	1	0	1	1	1	1	1	1	1	1	1	1	1
NM_017819.1	IOH45746	RNA (guanine-9-)-methyltransferase domain-containing protein 1, mitochondrial	3268.21	0.719298	41	0	0	0	0	1	1	1	0	0	0	1	0	1	1	1	0	0	1	1	0	0	1	0	1	1	1	1	0	1	1	1	1	1	0	1	1	1	1	1	1	1	1	1	1
NM_032207.1	IOH52563	Uncharacterized protein C19orf44	3264.4	0.684211	39	0	0	0	0	1	1	1	1	0	1	0	0	1	1	1	1	0	1	1	0	0	1	0	1	1	1	0	0	1	1	1	1	1	0	1	0	1	1	1	1	0	1	1	1
BC000758.1	IOH3735	Coiled-coil domain-containing protein 28A	3263.97	0.666667	38	0	0	0	0	1	1	1	0	0	1	1	0	1	1	0	0	0	1	1	0	0	1	0	1	1	1	0	0	1	1	1	1	1	0	1	1	1	0	1	1	1	1	1	1
BC032825.2	IOH26816	SH3-domain GRB2-like 2 (SH3GL2)	3263.94	0.631579	36	0	0	0	0	1	1	1	1	0	0	0	0	0	1	1	1	0	1	1	0	0	0	0	1	1	1	1	0	0	0	1	1	1	1	1	0	1	1	1	0	1	1	1	1
NM_014466.2	IOH27569	tektin 2 (testicular) (TEKT2)	3251.04	0.701754	40	0	0	0	0	1	1	1	0	1	0	0	0	1	1	1	0	0	1	1	0	0	1	0	1	0	1	1	0	1	1	1	1	1	0	1	1	1	1	1	1	1	1	1	1
NM_005641.2	IOH11381	TAF6 RNA polymerase II, TATA box binding protein (TBP)-associated factor, 80kDa (TAF6), transcript variant 1	3249.78	0.754386	43	0	0	1	0	1	1	1	0	0	1	1	0	1	1	1	1	0	1	0	0	0	1	0	1	1	1	1	1	1	1	1	0	1	0	1	1	1	1	1	1	1	1	1	1
BC064984.1	IOH40665	additional sex combs like 1 (Drosophila) (ASXL1)	3241.52	0.631579	36	0	0	0	0	1	1	0	1	0	1	0	0	1	1	1	0	0	1	1	0	0	0	0	1	1	1	0	0	1	1	0	1	1	1	0	0	1	0	1	1	1	1	1	1
NM_012121.4	IOH45907	CDC42 effector protein (Rho GTPase binding) 4 (CDC42EP4)	3239.93	0.719298	41	0	0	1	0	1	1	1	0	1	1	1	0	1	1	1	0	0	1	1	0	0	1	0	1	1	1	1	0	1	1	1	0	0	1	1	1	1	0	1	1	1	0	1	1
BC011399.1		spleen tyrosine kinase (SYK)	3237.43	0.807018	46	0	0	1	0	1	1	1	0	1	1	1	0	1	1	1	0	0	1	1	0	0	1	0	1	1	1	1	1	1	1	1	1	1	0	1	1	1	1	1	1	1	1	1	1
NM_007373.2	IOH26711	soc-2 suppressor of clear homolog (C. elegans) (SHOC2)	3228.63	0.649123	37	0	0	0	0	0	1	1	0	0	0	0	0	1	1	0	0	0	1	1	0	0	0	0	1	1	1	1	1	1	1	1	1	1	1	0	1	1	1	1	1	1	1	1	1
NM_198216.1	IOH44674	small nuclear ribonucleoprotein polypeptides B and B1 (SNRPB), transcript variant 1, mRNA.	3224.08	0.77193	44	0	0	1	0	1	1	1	1	0	1	1	1	1	1	1	0	0	1	1	0	0	1	0	1	1	1	1	0	0	1	1	1	1	1	1	1	1	0	1	1	1	1	1	1
NM_145245.1	IOH12245	ecotropic viral integration site 5-like (EVI5L)	3223.02	0.666667	38	0	0	1	0	1	1	1	0	1	1	0	0	1	1	1	0	0	1	1	0	0	1	0	1	1	1	0	0	0	1	0	1	1	0	1	1	1	0	1	1	1	1	1	0
BC004876.1	IOH5626	Protein MCM10 homolog	3213.97	0.77193	44	0	0	0	0	1	1	1	1	0	1	1	0	1	1	1	0	0	1	1	0	0	1	0	1	1	1	1	0	1	1	1	1	1	1	1	1	1	1	1	1	1	1	1	1
NM_002822.1	IOH25866	Twinfilin-1	3206.15	0.631579	36	0	0	0	0	1	1	1	1	0	1	1	0	1	1	0	1	0	1	0	0	0	1	0	1	1	1	1	0	1	1	0	1	1	0	1	1	1	0	1	1	1	1	1	1
NM_032883.1	IOH6975	TOX high mobility group box family member 2 (TOX2), transcript variant 3	3200.68	0.631579	36	0	0	0	0	1	1	1	1	0	1	1	0	1	1	1	1	0	1	1	0	0	1	0	1	1	1	0	0	1	0	0	1	0	1	1	1	0	1	0	0	1	1	1	1
BC094800.1	IOH62619	Jouberin	3199.04	0.719298	41	0	0	1	0	1	1	1	1	1	0	1	0	1	1	1	0	0	1	0	0	0	1	0	1	0	1	1	0	1	1	1	1	1	1	1	1	1	0	1	1	0	1	1	1
NM_004873.1	IOH26366	BCL2-associated athanogene 5 (BAG5), transcript variant 2	3194.12	0.719298	41	0	0	1	0	1	1	1	1	1	1	1	0	0	1	1	1	0	1	0	0	0	1	0	1	0	1	1	0	1	1	1	1	1	1	1	1	1	0	1	1	1	1	1	1
NM_000983.3	IOH58958	60S ribosomal protein L22	3186.96	0.666667	38	0	0	0	0	1	1	1	1	0	1	0	0	0	1	1	0	0	1	1	0	0	1	0	0	1	1	1	0	1	1	1	1	1	0	1	1	1	0	1	1	1	0	1	1
NM_017588.1	IOH4895	WD repeat domain 5 (WDR5), transcript variant 1	3185.53	0.666667	38	0	0	1	0	1	1	1	0	0	1	1	0	1	1	1	0	0	1	1	0	0	1	0	1	1	1	0	0	1	1	0	1	1	0	1	1	1	0	1	1	1	0	1	1
BC022270.1	IOH12872	CDKN2A interacting protein (CDKN2AIP)	3184.99	0.736842	42	0	0	0	0	1	1	1	1	0	1	0	0	1	1	1	0	0	1	1	0	0	0	0	1	1	1	1	0	1	1	1	1	1	1	1	1	1	1	1	1	1	1	1	1
BC054004.1	IOH29012	septin 9 (SEPT9)	3183.4	0.614035	35	1	0	0	0	1	1	1	0	0	1	1	0	0	1	1	0	0	1	1	0	0	1	0	1	0	1	1	0	0	1	1	1	0	0	1	0	1	0	0	1	1	1	1	1
NM_024946.1	IOH10395	NEFA-interacting nuclear protein NIP30 (NIP30)	3182.48	0.649123	37	0	0	1	0	1	0	1	0	1	1	0	0	1	1	1	0	0	1	0	0	0	1	0	1	1	1	0	0	1	1	1	1	1	1	1	0	1	1	1	1	1	1	0	1
NM_144594.1	IOH10942	family with sequence similarity 112, member B (FAM112B)	3180.77	0.736842	42	0	0	1	1	1	1	1	0	0	0	1	0	1	1	1	1	0	1	1	0	0	1	0	1	1	1	1	0	1	1	0	1	1	1	1	0	1	1	1	1	1	1	0	1
BC006083.1	IOH6556	tyrosyl-DNA phosphodiesterase 1 (TDP1)	3177.67	0.736842	42	0	0	1	0	1	0	1	1	0	1	0	0	1	1	1	0	0	1	1	0	0	0	0	1	1	1	1	0	1	1	1	1	1	0	1	1	1	1	1	1	1	1	1	1
NM_032905.3	IOH56977	Splicing factor 45	3175.68	0.614035	35	0	0	0	1	1	0	1	1	0	1	1	0	1	1	1	0	0	1	0	1	0	1	0	0	1	1	0	0	1	1	1	0	1	0	1	0	1	1	1	1	0	0	1	1
NM_032858.1	IOH12001	maelstrom homolog (Drosophila) (MAEL)	3167.23	0.719298	41	0	0	0	0	1	1	1	0	0	1	1	0	1	1	0	0	0	1	0	0	0	1	0	1	1	1	1	0	1	1	1	1	1	0	1	1	1	1	1	1	1	1	1	1
BC031231.1	IOH27515	serine/threonine kinase 33 (STK33)	3164.71	0.77193	44	0	0	1	0	1	1	1	1	1	1	1	0	1	0	1	0	0	1	1	0	0	1	0	1	1	1	1	1	1	1	1	1	0	1	1	1	1	0	1	1	1	1	1	1
NM_130807.1	IOH10112	MOB1, Mps One Binder kinase activator-like 2A (yeast) (MOBKL2A)	3162.23	0.684211	39	0	0	1	0	1	1	1	0	1	0	1	0	0	1	0	0	0	1	0	0	0	1	0	1	1	1	1	0	1	1	1	1	1	0	1	1	1	1	1	1	1	1	1	0
PV4395		Serine/threonine-protein kinase MARK1	3160.7	0.701754	40	0	0	1	0	1	1	1	0	0	1	1	0	1	1	1	0	0	1	0	0	0	1	0	1	1	1	1	0	1	1	1	1	0	1	1	1	1	0	1	1	1	1	1	1
BC036184.1	IOH62166	Tropomodulin-2	3158.03	0.684211	39	0	1	1	0	1	0	1	1	0	1	0	0	1	1	1	0	0	1	1	0	0	1	0	1	1	1	0	0	1	1	0	1	1	0	1	0	1	1	1	0	1	1	1	1
NM_001641.2	IOH5081	APEX nuclease (multifunctional DNA repair enzyme) 1 (APEX1), transcript variant 1	3157.68	0.614035	35	0	0	0	0	1	1	1	0	0	1	1	0	1	1	1	0	0	1	1	0	0	1	0	1	0	1	0	0	1	0	0	1	1	1	0	0	1	0	1	1	1	0	1	1
BC033088.1	IOH23217	lamin A/C (LMNA)	3155.89	0.701754	40	0	0	0	0	1	1	1	0	0	0	1	0	0	1	1	1	0	1	1	0	0	1	0	1	1	1	1	0	1	1	1	1	1	1	1	0	1	1	1	1	0	1	1	1
PV3851		MAP/microtubule affinity-regulating kinase 4	3151.72	0.614035	35	0	0	1	0	1	0	1	0	0	1	1	0	0	0	1	0	0	1	0	0	0	1	0	1	0	1	1	0	1	1	1	1	1	1	1	1	1	0	0	1	0	1	1	1
BC065525.1	IOH40477	adducin 2 (beta) (ADD2)	3145.56	0.614035	35	0	0	1	0	1	1	1	1	1	1	1	0	0	1	1	0	0	1	1	0	0	1	0	1	1	1	0	1	0	1	0	1	1	0	1	1	1	0	1	1	0	1	1	1
BC001662.1		MAP kinase-activated protein kinase 3	3131.06	0.649123	37	0	0	0	0	1	1	1	0	0	1	0	0	1	1	1	0	0	1	0	0	0	0	0	0	1	1	1	0	1	1	1	1	1	1	0	1	1	1	1	1	1	1	1	1
NM_022787.2	IOH13215	nicotinamide nucleotide adenylyltransferase 1 (NMNAT1)	3130.75	0.77193	44	0	0	1	0	1	1	0	1	1	1	1	0	1	1	1	1	0	1	1	0	0	1	0	1	0	1	1	0	1	1	1	1	1	1	1	1	1	1	1	1	1	1	1	1
NM_078630.1	IOH37755	male-specific lethal 3-like 1 (Drosophila) (MSL3L1), transcript variant 2	3128.61	0.614035	35	0	0	1	0	0	1	1	0	1	0	0	0	1	1	1	0	0	1	0	0	0	1	0	0	1	1	1	0	0	1	1	1	1	1	1	1	1	1	1	1	1	1	1	1
BC092404.1	IOH62574	Rap guanine nucleotide exchange factor 3	3125.33	0.719298	41	0	0	0	0	1	0	1	0	0	1	1	0	1	1	1	1	0	1	0	0	0	0	0	1	1	1	1	1	1	1	1	1	1	1	1	1	1	0	1	1	1	1	1	1
XM_375456.2	IOH43380	Ataxin-7-like protein 3	3122.1	0.666667	38	0	1	1	0	1	0	1	0	0	1	1	0	1	1	1	0	0	1	1	0	0	1	0	1	1	1	1	0	1	1	1	0	1	0	1	0	1	0	1	1	1	1	1	1
NM_001005360.1	IOH53617	Dynamin-2	3121.83	0.736842	42	0	0	1	0	1	1	1	0	1	1	1	0	0	1	1	0	0	1	1	0	0	1	0	1	1	1	1	0	1	1	1	1	0	0	1	1	1	1	1	1	1	1	1	1
BC008744.2	IOH40663	Pleckstrin homology domain-containing family O member 2	3110.64	0.649123	37	0	0	0	0	1	1	1	1	0	1	1	0	1	1	1	0	0	1	0	0	0	1	0	0	1	1	1	0	1	1	1	1	0	1	1	1	1	0	1	1	1	0	1	1
NM_002254.5	IOH42589	kinesin family member 3C (KIF3C)	3109.29	0.719298	41	0	0	1	0	1	1	0	0	1	1	1	0	1	1	1	1	0	1	0	0	0	1	0	1	1	1	1	0	1	1	1	1	1	1	1	0	1	0	1	1	0	1	1	1
NM_003503.2		Cell division cycle 7-related protein kinase	3107.95	0.754386	43	0	0	1	0	1	1	1	0	0	1	1	0	1	1	1	0	0	1	1	0	0	1	0	1	1	1	1	0	1	1	1	1	1	0	1	1	1	1	1	1	1	1	1	1
NM_016364.2	IOH12214	dual specificity phosphatase 13 (DUSP13), transcript variant 6	3102.66	0.684211	39	0	0	0	0	1	1	1	1	0	1	0	0	1	1	1	0	0	1	0	0	0	1	0	0	0	1	1	0	1	1	1	1	1	1	1	1	1	0	1	1	0	1	1	1
BC016609.1	IOH11216	cytidine monophosphate N-acetylneuraminic acid synthetase (CMAS)	3095.03	0.807018	46	0	0	1	0	1	1	1	1	1	1	1	0	1	1	1	1	0	1	1	0	0	1	0	1	1	1	1	0	1	1	1	1	0	1	1	1	1	1	1	1	1	1	1	1
NM_007054.1	IOH26900	kinesin family member 3A (KIF3A)	3094.95	0.719298	41	0	0	0	0	1	1	1	1	0	0	0	0	1	1	1	0	0	1	1	0	0	1	0	1	1	1	1	0	1	1	1	1	1	1	1	1	1	1	1	1	1	1	1	1
NM_032752.1	IOH6862	zinc finger protein 496 (ZNF496)	3094.39	0.631579	36	1	0	1	0	1	0	1	0	0	1	0	0	1	1	0	0	0	1	0	0	0	1	0	1	1	1	0	0	1	1	0	1	1	0	1	1	1	1	1	0	1	1	1	1
NM_001004306.1	IOH40085	similar to hypothetical protein FLJ36492 (MGC87631)	3088.75	0.754386	43	0	0	0	0	1	1	1	1	1	1	0	0	1	1	1	0	0	1	0	0	0	1	0	1	1	1	1	0	1	1	1	1	1	1	1	1	1	1	1	1	1	1	1	1
BC033758.1	IOH21879	centaurin, alpha 2 (CENTA2)	3085.37	0.684211	39	0	0	0	0	1	1	1	1	0	1	0	0	1	1	1	0	0	1	1	0	0	1	0	1	1	1	0	0	1	1	1	1	1	0	1	1	1	1	1	1	1	0	1	1
BC009820.2	IOH12615	chromosome 11 open reading frame 63 (C11orf63)	3077.99	0.649123	37	0	0	0	0	1	1	0	1	0	1	1	0	1	0	1	0	0	0	0	0	0	1	0	1	1	1	1	0	1	1	1	1	0	1	1	1	1	0	1	1	1	1	1	1
NM_012117.1	IOH3162	chromobox homolog 5 (HP1 alpha homolog, Drosophila) (CBX5)	3076.07	0.754386	43	0	0	1	1	1	1	1	0	0	1	1	0	1	1	1	0	0	1	1	0	0	1	0	1	1	1	1	0	1	1	1	1	1	0	1	1	1	0	1	1	1	1	1	1
NM_138779.1	IOH10711	chromosome 13 open reading frame 27 (C13orf27)	3068.13	0.684211	39	0	0	1	0	1	1	1	0	0	1	1	0	1	1	1	0	0	1	1	0	0	1	0	1	0	1	0	0	1	1	0	1	1	1	0	1	1	0	1	1	1	1	1	1
BC004259.1	IOH5453	chromosome 14 open reading frame 140 (C14orf140)	3065.53	0.736842	42	0	0	1	0	1	1	1	1	1	0	0	0	1	1	1	0	0	1	0	0	0	1	0	1	1	1	1	0	1	1	1	1	1	1	1	1	1	1	1	1	1	1	1	1
NM_003910.2	IOH23209	BUD31 homolog (S. cerevisiae) (BUD31)	3064.04	0.684211	39	0	0	0	0	1	0	1	1	0	1	0	1	1	1	1	1	0	1	0	0	0	1	0	1	1	1	1	0	1	1	1	1	1	0	1	1	1	0	1	1	1	1	1	1
BC036099.1	IOH27225	aryl-hydrocarbon receptor nuclear translocator 2 (ARNT2)	3060.42	0.77193	44	0	0	0	0	1	0	1	1	1	1	1	0	1	1	1	0	0	1	1	0	0	1	0	1	1	1	1	1	1	1	1	1	1	1	1	1	1	1	1	1	1	1	1	1
NM_015698.2	IOH3563	G patch domain and KOW motifs (GPKOW)	3048.37	0.719298	41	0	0	0	0	1	0	1	1	1	1	1	0	1	1	1	0	0	1	0	0	0	1	0	1	1	1	1	0	1	1	1	1	1	1	1	1	1	0	1	1	1	1	1	1
BC059174.1	IOH28851	TRAF3-interacting protein 1	3042.39	0.649123	37	0	0	1	0	1	0	1	1	0	1	1	0	1	1	0	1	0	1	0	0	0	1	0	1	1	0	1	0	1	1	1	0	1	1	1	1	1	0	1	1	1	1	1	1
NM_001381.2	IOH2343	docking protein 1, 62kDa (downstream of tyrosine kinase 1) (DOK1)	3035.12	0.754386	43	0	0	0	0	1	1	1	1	0	1	1	0	1	1	1	0	0	1	1	0	0	1	0	1	1	1	1	1	1	1	1	1	1	0	1	0	1	1	1	1	1	1	1	1
NM_153764.1	IOH45724	potassium inwardly-rectifying channel, subfamily J, member 1 (KCNJ1), transcript variant rom-k2	3031.5	0.77193	44	0	0	1	1	1	1	1	1	0	1	0	0	1	1	1	0	0	1	1	0	0	1	0	1	0	1	1	0	1	1	1	1	1	1	1	1	1	1	1	1	1	1	1	1
BC067085.1	IOH57304	Huntingtin-interacting protein 1-related protein	3030.45	0.77193	44	0	0	0	0	1	1	1	1	0	1	1	0	1	1	1	0	0	1	0	0	0	0	0	1	1	1	1	1	1	1	1	1	1	1	1	1	1	1	1	1	1	1	1	1
NM_006223.1	IOH7192	protein (peptidylprolyl cis/trans isomerase) NIMA-interacting, 4 (parvulin) (PIN4)	3020.02	0.649123	37	0	0	0	0	1	0	1	0	0	0	0	0	1	1	1	0	0	1	1	0	0	1	0	0	1	1	1	0	1	1	1	1	1	1	1	0	1	0	1	1	1	1	1	1
NM_022491.2	IOH62643	Sin3 histone deacetylase corepressor complex component SDS3	3016.22	0.649123	37	0	0	0	0	1	1	1	0	0	1	0	0	1	1	1	0	0	1	1	0	0	0	0	1	0	1	1	1	1	1	1	1	0	1	1	1	1	0	1	1	0	1	1	1
BC000633.1		Dual specificity protein kinase TTK	3005.21	0.736842	42	0	0	1	0	1	1	1	0	1	1	1	0	1	0	1	0	1	1	1	0	0	1	0	1	1	1	1	1	1	1	1	1	1	1	0	1	1	1	0	1	1	1	1	0
BC053509.1	IOH29394	5,10-methylenetetrahydrofolate reductase (NADPH) (MTHFR)	2993.4	0.614035	35	0	0	0	0	1	1	1	0	0	0	0	0	0	0	1	1	0	1	1	0	0	0	0	1	1	1	1	0	1	1	0	0	1	1	0	0	1	1	1	1	1	1	1	1
NM_002930.1	IOH54792	GTP-binding protein Rit2	2992.19	0.649123	37	0	0	0	0	1	0	1	1	0	1	1	0	1	1	1	0	0	1	1	0	0	1	0	1	1	1	1	0	1	1	1	0	1	0	1	0	1	0	1	1	0	1	1	1
BC003398.1	IOH3008	MOB1, Mps One Binder kinase activator-like 1B (yeast) (MOBK1B)	2984.89	0.684211	39	0	0	0	0	1	1	1	1	0	1	0	0	1	1	1	0	0	1	0	0	0	1	0	1	1	1	0	1	1	1	1	1	1	0	1	1	1	0	1	1	1	1	1	1
NM_007189.1	IOH3871	ATP-binding cassette, sub-family F (GCN20), member 2 (ABCF2), nuclear gene encoding mitochondrial protein, transcript variant 1	2978.41	0.754386	43	0	0	1	0	1	1	1	1	0	1	0	0	1	1	1	1	0	1	1	0	0	0	0	1	1	1	1	0	1	1	1	1	1	1	1	1	1	0	1	1	1	1	1	1
NM_032332.2	IOH6146	mitogen-activated protein kinase organizer 1 (MORG1), transcript variant 2	2977.79	0.701754	40	0	0	0	0	1	1	1	0	0	1	0	0	1	1	1	0	0	1	1	0	0	1	0	0	1	1	1	0	1	1	1	1	1	1	1	1	1	0	1	1	1	1	1	1
NM_203425.1	IOH26973	chromosome 17 open reading frame 82 (C17orf82)	2977.11	0.719298	41	0	0	0	0	1	1	1	0	0	1	1	0	1	1	1	0	0	1	1	0	0	1	0	0	1	1	0	0	1	1	0	1	1	1	1	1	1	1	1	1	1	1	1	1
BC063500.1	IOH39897	Tigger transposable element-derived protein 1	2973.97	0.701754	40	0	0	1	0	1	1	1	0	1	1	1	0	1	1	0	0	0	1	0	0	0	1	0	0	1	1	1	0	1	1	1	1	1	0	1	1	1	1	1	1	1	1	0	1
BC035143.1	IOH40223	Tigger transposable element-derived protein 1	2973.96	0.684211	39	0	0	0	0	1	1	1	0	0	1	0	0	1	1	1	0	0	1	0	0	0	0	0	1	1	1	0	0	1	1	1	1	1	0	1	1	1	1	1	1	1	1	1	1
NM_001668.2	IOH36815	Aryl hydrocarbon receptor nuclear translocator	2973.76	0.666667	38	0	0	1	0	1	1	1	1	1	1	0	0	1	1	1	0	0	1	1	0	0	0	0	1	1	1	0	0	1	0	0	1	1	1	1	1	1	0	1	0	1	1	0	1
BC044586.1	IOH28860	ATP-dependent RNA helicase DHX8	2970.82	0.631579	36	0	0	1	0	1	1	1	0	0	1	0	1	0	1	1	0	0	1	1	0	0	0	0	1	1	1	1	0	1	1	0	1	1	0	1	0	1	0	1	0	1	1	1	1
NM_198517.2	IOH25922	TBC1 domain family, member 10C (TBC1D10C)	2968.72	0.684211	39	0	0	1	0	1	1	0	1	1	1	1	0	1	1	1	0	0	1	0	0	0	1	0	0	1	1	1	0	1	1	1	1	1	1	0	1	1	0	1	1	1	1	1	1
NM_001009959.1	IOH43447	Ermin	2968.01	0.719298	41	0	0	1	0	1	1	0	0	1	1	1	0	1	1	1	0	0	1	0	0	0	1	0	0	1	1	1	1	1	1	1	1	1	1	0	1	0	1	1	1	1	1	1	1
BC048301.1	IOH26612	zinc finger, CCHC domain containing 11 (ZCCHC11)	2959.46	0.631579	36	0	0	1	0	1	1	1	0	1	1	0	0	1	1	1	0	0	1	0	0	0	1	0	1	0	1	0	0	0	1	1	1	0	1	1	1	1	1	1	1	1	1	0	1
NM_002805.1	IOH3508	proteasome (prosome, macropain) 26S subunit, ATPase, 5 (PSMC5)	2951.68	0.701754	40	0	0	1	0	1	1	1	0	1	0	0	0	1	1	0	0	0	1	0	0	0	1	0	1	1	1	1	0	1	1	1	1	1	1	1	1	1	1	1	1	0	1	1	1
NM_001142.2	IOH35187	amelogenin (amelogenesis imperfecta 1, X-linked) (AMELX), transcript variant 1	2948.82	0.701754	40	0	0	0	0	1	1	1	0	0	1	1	0	1	1	0	0	0	1	0	0	0	1	0	1	1	1	0	0	1	1	1	1	1	0	1	1	1	1	1	1	1	1	1	1
BC016778.1	IOH14690	KRR1, small subunit (SSU) processome component, homolog (yeast) (KRR1)	2945.76	0.666667	38	0	1	1	0	1	1	0	0	1	1	0	0	1	1	1	0	0	1	0	0	0	1	0	1	1	1	1	0	1	1	0	1	1	1	0	1	1	0	1	1	1	1	1	1
BC017781.1	IOH12143	endomucin (EMCN)	2926.47	0.614035	35	0	0	1	0	1	1	1	0	1	1	1	0	0	1	1	1	0	1	1	0	0	0	0	1	1	1	1	0	1	1	0	1	0	0	1	0	1	0	1	1	0	1	1	0
NM_005595.1	IOH12791	nuclear factor I/A (NFIA)	2916.98	0.649123	37	0	0	0	0	1	0	1	0	0	1	1	0	1	1	1	0	0	1	1	0	0	1	0	1	1	1	0	0	1	1	1	1	1	0	1	1	1	0	1	1	1	1	1	1
NM_005737.3	IOH44753	ADP-ribosylation factor-like 4C (ARL4C)	2916.93	0.701754	40	0	0	0	0	1	1	0	0	0	0	1	0	1	0	1	1	0	1	0	0	0	1	0	1	1	1	1	0	1	1	1	1	1	1	1	1	1	1	1	1	1	1	1	1
BC002859.1	IOH5428	zinc finger protein 434 (ZNF434)	2916.26	0.666667	38	0	0	1	0	1	1	1	1	1	1	0	0	1	1	1	1	0	1	0	0	0	1	0	1	1	1	1	0	0	1	0	0	0	1	0	1	1	1	1	1	1	1	1	1
BC008726.1		Serine/threonine-protein kinase OSR1	2911.2	0.701754	40	0	0	1	0	1	1	1	0	1	1	1	0	1	0	0	0	0	1	0	0	0	1	0	1	1	1	1	0	0	1	1	1	1	1	1	1	1	0	1	1	1	1	0	1
NM_016224.3	IOH55509	Sorting nexin-9	2910.91	0.684211	39	0	0	0	0	1	1	1	1	0	0	1	0	1	1	1	0	0	1	1	0	0	1	0	1	1	1	1	0	1	1	1	1	0	0	1	1	1	1	1	1	1	0	1	1
NM_006832.1	IOH12652	pleckstrin homology domain containing, family C (with FERM domain) member 1 (PLEKHC1)	2908	0.666667	38	0	0	0	0	1	1	1	0	0	1	0	0	0	1	1	1	0	1	1	0	0	1	0	1	1	1	1	0	1	0	1	1	1	1	1	1	1	1	1	1	0	1	0	0
NM_134427.1	IOH45474	regulator of G-protein signaling 3 (RGS3), transcript variant 4	2907.73	0.666667	38	0	0	0	0	1	1	1	0	0	1	0	0	1	1	1	0	0	1	1	0	0	0	0	1	1	1	1	0	1	1	1	1	1	0	1	0	1	0	1	1	1	1	1	1
NM_018439.1	IOH23069	Impact homolog (mouse) (IMPACT)	2905.26	0.666667	38	0	0	0	0	1	1	1	0	0	0	0	0	1	1	1	0	0	1	1	0	0	0	0	0	1	1	1	0	1	1	1	1	1	1	1	1	1	1	1	1	1	1	1	1
BC021906.1	IOH25790	formin-like 1 (FMNL1)	2904.71	0.701754	40	0	0	1	0	1	1	1	1	0	1	1	0	1	1	1	0	0	1	1	0	0	1	0	1	1	1	0	0	1	1	1	1	0	0	0	1	1	0	1	1	1	1	1	1
NM_006590.2	IOH45672	ubiquitin specific peptidase 39 (USP39)	2903.42	0.77193	44	0	0	1	0	1	1	1	1	1	1	0	0	1	1	1	0	0	1	1	0	0	1	0	1	1	1	1	0	1	1	1	1	1	1	1	1	1	0	1	1	1	1	1	1
BC013009.1	IOH13110	zinc finger, MYM-type 3 (ZMYM3)	2897.73	0.719298	41	0	0	0	0	1	1	1	0	0	1	1	0	1	0	1	0	0	1	1	0	0	1	0	1	1	1	1	0	1	1	1	1	0	1	1	1	1	1	1	1	1	1	1	1
BC006104.1	IOH6588	RIO kinase 1 (yeast) (RIOK1)	2897.22	0.631579	36	0	0	0	0	0	1	0	0	0	1	0	0	1	1	1	0	0	1	0	0	0	1	0	1	1	1	0	0	1	1	1	1	1	1	1	1	1	0	1	1	1	1	1	1
NM_020182.3	IOH41590	transmembrane, prostate androgen induced RNA (TMEPAI), transcript variant 1	2894.74	0.754386	43	0	0	1	0	1	1	1	1	1	1	0	0	1	1	1	0	0	1	1	0	0	1	0	1	1	0	1	0	1	1	1	1	1	0	1	1	1	1	1	1	1	1	1	1
NM_198219.1	IOH59467	Inhibitor of growth protein 1	2887.3	0.614035	35	0	0	1	0	1	1	1	0	0	0	1	0	1	0	0	0	0	0	0	0	0	0	0	0	1	1	1	1	1	1	1	1	1	1	1	1	1	0	1	1	0	1	1	1
BC007015.1	IOH29312	cyclin E2 (CCNE2)	2886.16	0.631579	36	0	0	0	0	0	1	1	0	0	1	0	0	0	1	1	0	0	1	1	0	0	0	0	1	1	1	1	0	1	1	1	1	1	0	1	1	1	0	0	1	1	1	1	1
BC050434.1	IOH26685	hypothetical protein FLJ10154 (FLJ10154)	2880.74	0.666667	38	0	0	1	0	1	1	1	0	1	1	0	0	0	1	1	0	0	1	1	0	0	1	0	1	0	1	1	0	1	1	1	1	0	0	0	0	1	1	1	1	1	1	1	1
BC047411.1	IOH26516	tubulin tyrosine ligase-like family, member 2 (TTLL2)	2880.25	0.701754	40	0	0	0	0	1	1	1	0	0	1	1	0	1	1	1	0	0	1	0	0	0	0	0	1	1	1	1	1	1	1	1	1	1	1	0	1	1	1	1	1	1	1	1	1
BC012576.1	IOH12217	bromodomain adjacent to zinc finger domain, 2B, mRNA (cDNA clone IMAGE:4290975), complete cds.	2879.89	0.701754	40	1	0	1	0	1	1	1	1	1	1	1	0	1	1	0	1	0	1	1	0	0	1	0	1	1	1	1	0	1	1	0	1	1	0	1	1	1	0	1	1	1	1	0	1
BC057783.1	IOH29271	splicing factor, arginine/serine-rich 2B (SFRS2B)	2879.01	0.684211	39	0	0	1	0	0	1	1	0	1	0	0	0	1	1	1	0	0	1	1	0	0	0	0	0	1	1	1	0	1	1	1	1	1	1	1	1	1	1	1	1	1	1	1	1
BC008902.2	IOH7022	GRIP and coiled-coil domain-containing protein 1	2878.75	0.649123	37	0	0	0	0	1	1	1	1	0	1	1	0	1	1	1	0	0	1	1	0	0	1	0	1	1	1	1	0	0	0	1	1	1	0	1	1	1	1	0	1	1	1	1	1
BC000103.1	IOH4659	NCK adaptor protein 2 (NCK2)	2876.11	0.701754	40	0	0	1	0	1	1	1	1	0	1	0	0	1	1	0	0	0	1	1	0	0	1	0	1	1	1	1	1	1	1	1	1	1	1	1	1	1	0	1	1	1	1	0	1
NM_005884.2		p21(CDKN1A)-activated kinase 4 (PAK4), transcript variant 1	2869.11	0.649123	37	0	0	1	0	1	1	1	1	1	0	1	0	1	0	1	0	0	1	0	0	0	1	0	1	0	1	1	0	1	1	1	1	1	1	1	1	1	0	0	1	0	1	1	1
NM_033345.1	IOH40371	regulator of G-protein signaling 8 (RGS8), transcript variant 1	2866.88	0.701754	40	0	0	0	0	1	1	1	1	0	1	1	1	1	1	1	0	0	1	0	0	0	1	0	1	1	1	1	0	0	1	1	1	1	0	1	0	1	1	1	1	1	1	1	1
BC022344.1	IOH14799	twinfilin, actin-binding protein, homolog 1 (Drosophila) (TWF1)	2865.5	0.614035	35	0	0	0	0	1	1	1	1	0	0	1	0	1	1	1	0	0	1	0	0	0	0	0	1	1	1	0	0	1	1	1	1	0	0	1	0	1	1	1	1	1	1	0	1
NM_018698.3	IOH43204	nuclear transport factor 2-like export factor 2 (NXT2)	2857.82	0.701754	40	0	0	0	0	1	0	1	0	0	1	0	0	1	1	1	0	0	1	0	0	0	1	0	0	1	1	1	1	1	1	1	0	1	1	1	1	1	1	1	1	1	1	1	1
NM_013975.1	IOH40893	ligase III, DNA, ATP-dependent (LIG3), nuclear gene encoding mitochondrial protein, transcript variant alpha	2852.6	0.631579	36	0	1	0	0	1	1	1	1	0	0	1	0	1	1	1	0	0	1	0	0	0	0	0	1	1	1	0	0	1	1	1	1	0	0	0	1	1	0	1	1	1	1	1	1
NM_006838.1	IOH11106	methionyl aminopeptidase 2 (METAP2)	2850.91	0.631579	36	0	0	1	0	1	0	1	0	1	0	0	0	1	1	1	0	0	1	1	0	0	0	0	0	1	1	1	0	1	1	0	1	1	1	1	0	1	1	1	1	1	1	1	1
BC009877.1	IOH12614	P2Y purinoceptor 11	2850.04	0.614035	35	0	0	0	0	1	1	0	0	0	1	0	0	0	1	1	1	0	1	1	0	0	1	0	0	0	1	1	0	0	1	1	0	1	1	1	1	1	1	0	1	1	1	1	1
NM_002835.2	IOH28818	protein tyrosine phosphatase, non-receptor type 12 (PTPN12)	2848.59	0.666667	38	0	0	0	0	1	1	1	1	0	1	1	0	1	0	1	0	0	1	0	0	0	0	0	1	0	1	1	1	0	1	1	1	1	1	0	1	1	1	1	1	1	1	0	1
BC095401.1	IOH62645	AKT-interacting protein	2845.16	0.684211	39	0	0	0	0	1	1	1	0	0	1	0	0	1	1	1	0	0	1	0	0	0	1	0	0	1	1	1	1	0	1	1	1	1	1	1	1	1	0	1	1	1	1	1	1
NM_031305.1	IOH38124	Rho GTPase activating protein 24 (ARHGAP24), transcript variant 2	2843.91	0.754386	43	0	0	0	0	1	1	0	1	0	1	1	0	1	1	1	1	0	1	1	0	0	1	0	1	1	1	1	0	1	1	1	1	0	1	1	1	1	1	1	1	1	1	1	1
NM_014268.1	IOH5850	microtubule-associated protein, RP/EB family, member 2 (MAPRE2)	2839.64	0.684211	39	0	0	0	0	1	1	1	0	0	1	0	0	1	1	1	0	0	1	1	0	0	1	0	1	1	1	1	0	1	1	1	1	0	1	0	1	1	1	1	1	1	1	1	1
NM_002013.2	IOH14109	FK506 binding protein 3, 25kDa (FKBP3)	2838.21	0.666667	38	0	0	0	0	1	1	1	1	0	1	0	0	1	1	1	0	0	1	0	0	0	1	0	0	0	1	1	0	1	1	1	1	1	0	1	1	1	0	1	1	1	1	1	1
NM_003192.1	IOH14757	tubulin folding cofactor C (TBCC)	2828.32	0.719298	41	0	0	0	0	1	1	1	1	0	1	1	0	1	0	1	0	1	1	1	0	0	1	0	1	1	1	1	1	1	1	0	1	1	1	1	0	1	1	1	1	0	1	1	0
BC103812.1	IOH63363	Alpha-ketoglutarate-dependent dioxygenase alkB homolog 3	2827.51	0.736842	42	0	0	1	0	1	1	1	0	0	1	0	0	1	1	1	1	0	1	1	0	0	1	0	1	1	1	1	0	1	1	1	1	1	0	1	1	1	1	1	1	1	1	1	0
NM_003831.1	IOH20968	RIO kinase 3 (yeast) (RIOK3)	2827.44	0.631579	36	0	0	1	0	0	1	0	1	1	0	0	0	1	1	1	0	0	1	0	0	0	0	0	0	1	1	1	0	1	1	0	1	1	1	1	1	1	0	0	1	1	1	1	1
NM_002363.1	IOH10928	melanoma antigen family B, 1 (MAGEB1), transcript variant 1	2822.67	0.684211	39	0	0	0	0	1	1	1	0	0	1	1	0	0	0	1	0	0	1	1	0	0	1	0	1	1	1	1	0	1	1	1	1	0	1	1	1	1	0	1	1	1	1	1	1
NM_015687.2	IOH38763	filamin A interacting protein 1 (FILIP1)	2817.9	0.701754	40	0	0	0	0	1	1	1	1	0	1	1	0	0	0	1	0	0	1	1	0	0	1	0	0	1	1	1	0	1	1	1	1	1	1	1	1	1	1	0	1	0	1	1	1
BC020972.1		Casein kinase I isoform gamma-2	2817.76	0.649123	37	0	0	0	0	1	1	1	1	0	1	0	0	1	1	0	0	0	1	1	0	0	1	0	1	1	1	0	0	1	1	1	1	1	1	1	0	1	0	1	1	1	0	0	1
BC014037.1		Serine/threonine-protein kinase Sgk2	2816.72	0.736842	42	0	0	1	0	1	1	1	1	0	1	1	0	1	1	1	0	0	1	1	0	0	1	0	1	1	1	1	0	1	1	1	1	0	1	1	1	1	1	0	1	1	1	1	1
BC028565.1	IOH13565	Protein Daple	2813.45	0.701754	40	0	0	0	0	1	1	1	1	0	1	1	0	0	0	1	0	0	1	1	0	0	1	0	1	1	1	0	0	1	1	1	1	1	1	0	1	1	1	1	1	1	1	1	1
NM_002135.3	IOH10133	nuclear receptor subfamily 4, group A, member 1 (NR4A1), transcript variant 1	2812.47	0.77193	44	0	0	1	0	1	1	1	0	1	1	1	0	1	1	1	0	0	1	0	0	0	0	0	1	1	1	1	1	1	1	1	1	1	1	1	1	1	1	1	1	1	1	1	1
NM_004215.2	IOH10322	estrogen receptor binding site associated, antigen, 9 (EBAG9), transcript variant 1	2808.84	0.701754	40	0	0	1	0	1	1	1	0	1	1	1	0	1	1	1	0	0	1	1	0	0	0	0	0	1	1	1	0	1	1	1	1	1	1	0	1	1	1	1	1	1	1	1	1
NM_004857.2	IOH44899	A kinase (PRKA) anchor protein 5 (AKAP5)	2807.72	0.614035	35	1	0	0	0	1	1	1	1	0	1	0	0	1	1	1	0	0	1	0	0	0	1	0	1	1	1	1	0	1	1	0	1	1	0	1	1	1	0	1	1	0	1	0	1
NM_003668.2		mitogen-activated protein kinase-activated protein kinase 5 (MAPKAPK5), transcript variant 1	2801.82	0.684211	39	0	0	0	0	1	1	1	0	0	1	1	0	1	1	1	0	0	1	1	0	0	1	0	1	1	1	0	0	1	1	1	1	1	0	0	0	1	1	1	1	1	1	1	1
BC011600.1	IOH13680	cDNA clone IMAGE:3050953, **** WARNING: chimeric clone ****	2799.69	0.701754	40	0	0	0	0	1	1	1	1	0	1	0	0	1	1	1	1	0	1	1	0	0	0	0	1	1	1	1	0	1	1	1	1	1	0	1	1	1	0	1	1	1	1	0	1
BC021174.1	IOH10706	Small EDRK-rich factor 1	2798.8	0.631579	36	0	0	1	0	1	0	1	1	0	1	0	0	1	1	1	0	0	1	1	0	0	0	0	1	1	1	1	0	1	0	1	1	1	0	0	0	1	0	1	1	1	0	1	1
NM_021032.2	IOH35339	fibroblast growth factor 12 (FGF12), transcript variant 1	2796.88	0.684211	39	0	0	0	0	1	1	1	0	0	1	0	0	1	1	1	0	0	1	1	0	0	0	0	1	0	1	1	0	1	1	1	1	1	1	1	1	1	0	1	1	1	1	1	1
BC006986.1	IOH7170	RNA binding motif protein 41 (RBM41)	2795.45	0.666667	38	0	0	0	0	1	1	1	0	0	1	1	0	1	1	1	1	0	1	1	0	0	1	0	1	1	1	0	0	1	0	1	1	1	1	0	1	1	0	0	0	1	1	1	1
NM_014583.2	IOH4194	LIM and cysteine-rich domains 1 (LMCD1)	2794.28	0.701754	40	0	0	0	0	1	1	1	0	0	1	1	0	1	1	0	0	0	1	1	0	0	1	0	1	1	1	1	0	1	1	1	1	1	0	1	1	1	1	1	1	1	1	1	1
BC011392.1	IOH21419	3'-phosphoadenosine 5'-phosphosulfate synthase 1 (PAPSS1)	2792.65	0.684211	39	0	0	1	0	1	1	1	1	0	1	0	0	0	0	1	0	0	1	1	0	0	1	0	1	1	1	1	0	1	1	0	0	1	1	1	1	1	1	1	1	1	1	1	1
NM_080870.2	IOH40303	diffuse panbronchiolitis critical region 1 (DPCR1)	2789.48	0.701754	40	0	0	1	0	1	1	1	0	1	1	0	0	1	1	1	0	0	1	0	0	0	1	0	0	1	1	1	0	1	1	1	1	1	1	0	1	1	1	1	1	1	1	1	1
NM_003959.1	IOH60041	Huntingtin-interacting protein 1-related protein	2787.46	0.719298	41	0	0	0	0	1	1	1	0	0	0	1	0	1	1	1	1	0	1	0	0	0	1	0	1	1	1	1	0	1	1	1	1	1	0	1	1	1	1	1	1	1	1	1	1
NM_007285.5	IOH7450	GABA(A) receptor-associated protein-like 2 (GABARAPL2)	2783.42	0.631579	36	0	0	0	0	1	1	1	0	0	0	1	0	1	1	1	0	0	1	1	0	0	0	0	0	1	1	1	0	1	1	1	1	1	0	1	0	1	1	1	1	1	1	1	1
NM_006620.2	IOH4029	HBS1-like (S. cerevisiae) (HBS1L)	2779.36	0.649123	37	0	0	0	0	1	1	1	1	0	1	0	0	1	1	0	0	0	1	1	0	0	1	0	0	1	1	1	0	1	1	1	1	1	0	1	1	1	0	1	1	1	1	0	1
NM_001010844.1	IOH43230	Interleukin-1 receptor-associated kinase 1-binding protein 1	2775.17	0.631579	36	0	0	0	1	1	1	1	1	0	0	0	0	1	1	1	0	0	0	0	0	0	1	0	1	0	1	0	0	1	1	1	1	1	1	1	1	1	0	0	1	1	1	1	1
BC007340.2	IOH62790	bystin-like (BYSL)	2773.67	0.701754	40	0	0	0	0	1	1	1	1	0	1	0	1	1	1	1	0	0	1	0	0	0	1	0	1	1	1	0	0	0	1	1	1	1	1	1	1	1	1	1	1	1	1	1	1
BC067735.1	IOH40060	hypothetical protein DKFZp761B107 (DKFZp761B107)	2772.89	0.614035	35	0	0	1	0	1	0	1	0	1	0	0	0	0	1	1	1	0	1	0	0	0	1	0	1	1	1	1	0	0	1	1	1	0	1	1	0	1	0	1	1	1	1	1	1
BC011781.2	IOH13131	chromosome 9 open reading frame 37 (C9orf37)	2771.34	0.649123	37	0	0	1	0	1	1	1	0	1	0	0	0	1	0	1	0	0	1	1	0	0	1	0	1	1	1	1	0	1	1	1	1	0	0	1	1	1	1	1	1	0	1	1	1
NM_002136.1	IOH3526	heterogeneous nuclear ribonucleoprotein A1 (HNRNPA1), transcript variant 1	2757.87	0.649123	37	0	0	0	0	1	0	1	1	0	1	0	0	1	1	1	0	0	1	1	0	0	1	0	1	1	1	0	0	1	1	0	1	1	1	0	0	1	0	1	1	1	1	1	1
NM_001752.2	IOH41295	catalase (CAT)	2751.73	0.701754	40	0	1	0	0	1	0	1	0	0	1	0	0	1	1	1	1	0	1	1	0	0	1	0	1	1	1	1	0	1	1	1	1	0	1	1	1	1	1	1	1	1	1	1	1
BC003566.1	IOH4871	zinc finger protein 24 (ZNF24)	2738.95	0.754386	43	0	0	1	1	1	1	1	0	0	1	0	0	1	1	1	0	0	1	0	0	0	1	0	1	1	1	1	0	1	1	1	1	1	1	1	1	1	1	1	1	1	1	1	1
NM_173605.1	IOH21690	potassium channel regulator (KCNRG), transcript variant 1	2732.87	0.77193	44	0	0	0	0	1	1	1	1	0	1	1	0	1	1	1	1	0	1	1	0	0	1	0	1	1	1	1	0	1	1	1	1	1	1	1	1	1	0	1	1	1	1	1	1
NM_001001711.1	IOH56024	Protein DDI1 homolog 1	2731.88	0.701754	40	0	0	1	0	1	0	1	0	1	0	0	0	0	1	1	0	0	1	0	0	0	1	0	1	1	1	1	1	1	1	1	1	1	1	1	1	1	0	1	1	1	1	1	1
NM_017692.1	IOH4894	aprataxin (APTX), transcript variant 4	2730.17	0.649123	37	0	0	0	0	1	1	1	0	0	1	1	0	1	1	1	0	0	1	0	0	0	1	0	1	1	1	0	0	0	1	1	1	1	0	1	1	1	0	1	1	1	1	1	1
NM_001007025.1	IOH59792	Golgi SNAP receptor complex member 1	2724.54	0.631579	36	0	0	0	0	1	0	1	0	0	0	1	0	1	1	1	1	0	0	0	0	0	1	0	1	1	1	0	1	1	1	1	1	0	1	1	0	1	1	1	1	1	1	0	1
BC005298.1	IOH7271	cyclin-dependent kinase 7 (MO15 homolog, Xenopus laevis, cdk-activating kinase) (CDK7)	2721.92	0.666667	38	0	0	0	0	0	1	1	1	0	1	0	0	1	1	1	0	0	0	0	0	0	1	0	1	1	1	1	0	1	1	1	1	1	1	1	1	1	1	1	1	0	1	1	1
NM_004798.2	IOH38253	kinesin family member 3B (KIF3B)	2718.86	0.631579	36	0	0	0	0	1	1	1	0	0	1	1	0	1	1	1	0	0	1	0	0	0	1	0	1	1	1	0	0	1	1	0	0	1	1	0	1	1	0	1	1	1	1	1	1
NM_004871.2	IOH45920	golgi SNAP receptor complex member 1 (GOSR1), transcript variant 1	2718.39	0.684211	39	0	0	0	0	1	1	1	0	0	0	1	0	0	1	1	0	0	0	0	0	0	1	0	1	1	1	1	1	1	1	1	1	1	1	1	1	1	1	1	1	1	1	1	1
BC040106.1	IOH26285	hypothetical protein HSPC111 (HSPC111)	2716.71	0.649123	37	0	0	0	0	1	1	0	1	0	1	0	0	1	1	1	0	0	1	1	0	0	1	0	1	0	1	0	0	1	1	1	1	1	0	1	1	1	0	1	1	1	1	1	1
PV3866		v-abl Abelson murine leukemia viral oncogene homolog 1 (ABL1), transcript variant a; see catalog number for detailed information on wild-type or point mutant status	2709.7	0.684211	39	0	0	0	0	1	1	1	1	0	1	0	0	0	0	1	0	0	1	0	0	0	1	0	1	1	1	1	0	1	1	1	1	0	1	1	1	1	1	1	1	1	1	1	1
NM_016059.3	IOH4932	peptidylprolyl isomerase (cyclophilin)-like 1 (PPIL1)	2701	0.719298	41	0	0	0	0	1	1	1	1	0	1	0	0	1	1	1	0	0	1	1	0	0	1	0	1	0	1	1	0	1	1	1	1	1	1	1	1	1	0	1	1	1	1	1	1
BC000884.1	IOH3230	signal peptidase complex subunit 1 homolog (S. cerevisiae) (SPCS1)	2696.96	0.684211	39	0	0	0	0	1	1	0	0	0	1	0	0	1	1	1	0	0	1	1	0	0	1	0	0	1	1	1	0	1	1	1	1	1	1	1	1	1	1	1	1	1	1	1	1
NM_002904.4	IOH14621	RD RNA binding protein (RDBP)	2696.16	0.631579	36	0	0	1	0	1	1	1	0	0	1	1	0	1	1	1	1	0	1	0	0	0	1	0	1	1	1	1	0	1	1	0	1	1	0	1	1	1	1	0	1	1	0	0	1
NM_004078.1	IOH1778	cysteine and glycine-rich protein 1 (CSRP1)	2695.07	0.666667	38	0	0	0	0	1	1	0	0	0	1	1	0	1	1	1	0	0	1	0	0	0	1	0	1	1	1	1	0	1	1	1	1	0	0	1	1	1	1	0	1	1	1	1	1
NM_052969.1	IOH12514	ribosomal protein L39-like (RPL39L)	2692.89	0.684211	39	0	0	1	0	1	1	1	0	0	1	0	0	1	1	1	0	0	1	1	0	0	1	0	1	1	1	0	0	1	1	0	1	1	0	1	1	1	0	1	1	1	1	1	1
NM_001009613.1	IOH58584	Sperm protein associated with the nucleus on the X chromosome N4	2684.4	0.719298	41	0	0	1	0	1	1	1	1	1	1	0	0	1	1	1	0	0	1	1	0	0	1	0	0	1	1	1	0	1	1	1	1	1	1	1	0	1	0	1	1	1	1	1	1
NM_201613.1	IOH45918	IKK interacting protein (IKIP), transcript variant 3.1	2682.76	0.631579	36	0	0	1	0	1	1	0	0	1	0	1	0	1	1	1	0	0	1	1	0	0	1	0	1	1	1	0	0	1	1	1	1	1	0	1	1	1	0	0	1	1	1	1	0
BC028711.2	IOH11814	cancer/testis antigen CT45-3 (CT45-3)	2682.46	0.649123	37	0	0	1	0	1	1	1	1	1	1	0	0	1	1	1	0	0	1	1	0	0	1	0	1	0	1	1	0	0	1	1	1	0	1	1	0	1	0	0	1	1	1	1	1
BC010629.1	IOH9802	outer dense fiber of sperm tails 2 (ODF2)	2680.75	0.736842	42	0	0	0	0	1	1	1	1	0	1	1	0	1	1	1	1	0	1	1	0	0	1	0	0	1	1	1	0	1	1	1	1	0	1	1	1	1	1	1	1	0	1	1	1
NM_003600.1		aurora kinase A (AURKA), transcript variant 2	2671.42	0.666667	38	0	0	0	0	1	1	1	0	0	1	0	0	1	1	1	0	0	1	1	0	0	1	0	0	1	1	1	0	1	1	1	1	1	0	1	1	1	0	1	1	1	0	1	1
BC039014.1	IOH26125	RNA polymerase II associated protein 2 (RPAP2)	2667.89	0.684211	39	0	0	0	0	1	1	1	0	0	1	0	0	1	1	1	0	0	1	0	0	0	0	0	1	1	1	1	0	1	1	1	1	1	1	1	1	1	1	1	1	1	1	1	1
NM_006800.2	IOH45528	male-specific lethal 3-like 1 (Drosophila) (MSL3L1), transcript variant 3	2666.86	0.754386	43	0	0	1	0	1	1	1	0	1	1	1	0	1	1	1	0	0	1	1	0	0	1	0	1	1	1	1	1	1	1	1	1	0	0	0	1	1	1	1	1	1	1	1	1
BC034401.1	IOH22782	cDNA clone IMAGE:5172086, partial cds	2665.62	0.666667	38	0	0	1	0	1	1	1	0	1	1	1	0	0	1	1	0	0	1	0	0	0	1	0	1	1	1	0	0	1	1	1	1	1	0	0	1	1	0	1	1	1	1	1	1
BC031549.1	IOH21007	CDC-like kinase 1 (CLK1)	2663.21	0.666667	38	0	0	0	0	1	1	0	0	0	1	0	0	0	0	1	0	0	1	0	0	0	1	0	1	1	1	1	0	1	1	1	1	1	1	1	1	1	1	1	1	1	1	1	1
NM_012395.2	IOH37739	PFTAIRE protein kinase 1 (PFTK1)	2656.82	0.666667	38	0	0	1	1	1	1	1	1	0	1	0	0	1	1	0	0	0	1	1	0	0	1	0	1	1	1	1	1	1	1	1	1	1	1	1	1	1	1	1	1	1	0	0	1
NM_172070.2	IOH38243	zinc finger protein 650 (ZNF650)	2653.04	0.614035	35	0	0	0	0	0	1	1	0	0	0	0	0	0	1	1	0	0	1	1	0	0	1	0	0	1	1	0	0	1	1	1	1	0	0	1	1	1	0	1	1	1	1	1	1
NM_016167.3	IOH40609	nucleolar protein 7, 27kDa (NOL7)	2648.27	0.649123	37	0	0	0	0	1	1	1	0	0	0	0	0	1	1	1	0	0	1	1	0	0	1	0	1	1	1	1	0	1	1	0	1	1	1	1	0	1	0	1	1	1	0	1	1
NM_203418.1	IOH41499	regulator of calcineurin 1 (RCAN1), transcript variant 3	2646.28	0.719298	41	0	0	1	0	1	1	0	0	1	1	1	0	1	1	1	0	0	1	1	0	0	1	0	1	1	1	1	0	0	1	1	1	1	1	1	1	1	1	1	1	1	1	1	1
NM_138960.3	IOH59763	Homeobox protein TGIF2LX	2640.82	0.736842	42	0	0	0	0	1	1	1	0	1	1	1	0	1	1	1	0	0	1	1	0	0	1	0	1	1	1	1	0	1	1	1	1	0	1	1	1	1	0	1	1	1	1	1	1
BC017959.1	IOH12310	chromosome 2 open reading frame 47 (C2orf47)	2639.11	0.736842	42	0	0	0	0	1	1	1	1	0	1	1	0	1	1	1	1	0	1	1	0	0	1	0	1	1	1	1	0	1	1	1	1	1	1	1	1	1	1	1	1	1	1	1	1
NM_001896.2	IOH6369	casein kinase 2, alpha prime polypeptide (CSNK2A2)	2637.02	0.666667	38	0	0	0	0	1	1	1	0	0	1	0	0	1	1	1	0	0	1	1	0	0	1	0	0	1	1	0	0	1	1	1	1	1	0	1	1	1	0	1	1	1	1	1	1
NM_022756.2	IOH13235	Uncharacterized protein C1orf149	2636.9	0.631579	36	0	0	0	0	1	1	1	0	0	1	0	0	0	1	0	0	0	0	0	0	0	1	0	0	1	1	1	0	1	1	1	1	1	1	1	1	1	1	1	1	1	1	0	1
BC067445.1	IOH40160	disabled homolog 1 (Drosophila) (DAB1)	2634.16	0.631579	36	0	0	1	0	1	1	1	0	1	0	0	0	1	1	1	0	0	1	0	0	0	1	0	0	1	1	1	1	1	0	1	1	1	0	1	0	1	0	1	0	1	1	1	1
NM_001008239.1	IOH45708	chromosome 18 open reading frame 25 (C18orf25), transcript variant 2	2626.23	0.666667	38	0	0	0	0	1	1	1	0	0	1	1	0	1	1	0	0	0	1	0	0	0	1	0	0	1	1	1	0	1	1	1	1	1	1	1	1	1	1	1	1	1	1	0	1
NM_003688.1		Peripheral plasma membrane protein CASK	2625.68	0.649123	37	0	0	0	0	1	1	1	0	0	0	0	0	1	1	1	0	0	1	0	0	0	0	0	0	1	1	1	0	1	1	1	1	1	1	1	1	1	1	1	1	1	1	1	1
NM_139169.2	IOH22254	TruB pseudouridine (psi) synthase homolog 1 (E. coli) (TRUB1)	2625.59	0.701754	40	0	0	0	0	1	1	1	0	0	1	0	0	1	1	1	1	0	1	1	0	0	1	0	1	1	1	1	0	1	1	1	1	0	0	1	1	1	1	1	1	1	0	1	1
NM_015484.1	IOH9828	SYF2 homolog, RNA splicing factor (S. cerevisiae) (SYF2), transcript variant 1	2625.17	0.649123	37	0	0	1	0	1	1	1	0	1	1	0	0	0	1	1	0	0	1	0	0	0	0	0	0	1	1	1	0	1	1	1	1	1	1	0	1	0	1	1	1	1	1	1	1
NM_017949.1	IOH29099	CUE domain containing 1 (CUEDC1)	2622.61	0.631579	36	0	0	0	1	1	1	1	0	0	0	1	0	1	1	1	1	0	1	0	0	0	1	0	1	1	1	0	0	1	1	1	0	0	1	1	0	1	0	1	1	0	1	1	1
BC000251.1		Glycogen synthase kinase-3 beta	2619.25	0.684211	39	0	0	0	0	1	1	1	0	0	1	1	0	1	1	1	0	0	1	0	0	0	0	0	0	1	1	1	0	1	1	1	1	1	1	1	1	1	1	1	1	1	1	1	1
NM_018037.1	IOH45458	Ral GEF with PH domain and SH3 binding motif 2 (RALGPS2), transcript variant 1	2619.22	0.719298	41	0	0	1	0	1	1	1	1	1	1	0	0	0	1	1	1	0	1	0	0	0	0	0	1	1	1	1	1	0	1	1	1	1	1	1	1	1	0	1	1	1	1	1	1
BC001716.1	IOH4447	poly(A) binding protein interacting protein 2 (PAIP2)	2616.62	0.701754	40	0	0	1	0	1	1	1	1	1	1	1	0	1	1	1	0	0	0	0	0	0	1	0	1	1	1	0	0	0	1	1	1	0	1	1	1	1	1	1	1	0	1	1	1
NM_133494.1	IOH45126	NIMA (never in mitosis gene a)- related kinase 7 (NEK7)	2616.58	0.684211	39	0	0	0	0	1	0	1	0	0	1	0	0	1	1	1	0	0	1	1	0	0	0	0	1	1	1	1	0	1	1	1	1	1	1	1	1	1	0	1	1	1	1	1	1
NM_145691.3	IOH23101	ATP synthase mitochondrial F1 complex assembly factor 2 (ATPAF2), nuclear gene encoding mitochondrial protein	2615.35	0.614035	35	0	0	0	0	1	1	1	0	0	1	1	0	1	1	1	0	0	1	0	0	0	1	0	1	1	1	1	0	1	0	0	1	1	1	1	1	1	1	1	1	1	0	1	1
NM_015933.1	IOH3769	coiled-coil domain containing 72 (CCDC72)	2610.06	0.649123	37	0	0	0	0	1	1	1	0	0	1	0	0	1	1	1	0	0	1	1	0	0	1	0	1	0	1	1	0	1	1	1	1	1	0	0	0	1	0	1	1	1	1	1	1
NM_003690.3	IOH57108	Interferon-inducible double stranded RNA-dependent protein kinase activator A	2602.74	0.719298	41	0	0	1	0	1	0	1	0	1	1	0	0	1	1	1	0	0	1	1	0	0	0	0	1	1	1	1	0	1	1	1	1	1	1	1	1	1	0	1	1	1	1	1	1
BC067446.1	IOH40156	disabled homolog 1 (Drosophila) (DAB1)	2596.13	0.719298	41	0	0	1	0	1	1	1	0	1	1	1	0	1	1	1	0	0	1	1	0	0	1	0	1	1	1	1	1	1	0	1	1	0	1	1	1	1	0	1	1	1	1	1	1
NM_021967.1	IOH45915	small EDRK-rich factor 1A (telomeric) (SERF1A)	2592.61	0.684211	39	0	0	0	0	1	1	1	0	0	1	0	0	1	1	1	0	0	1	0	0	0	1	0	1	1	1	1	0	1	1	1	1	1	0	1	1	1	0	1	1	1	1	1	1
NM_014570.2	IOH5693	ADP-ribosylation factor GTPase activating protein 3 (ARFGAP3)	2592.1	0.649123	37	0	0	0	0	1	1	0	0	0	1	1	0	1	1	1	0	0	1	0	0	0	0	0	0	1	1	1	0	1	1	1	1	1	1	0	1	1	1	1	1	1	1	1	1
BC032662.1	IOH21986	polymerase (DNA directed) iota (POLI)	2590.33	0.649123	37	1	0	0	0	1	1	0	0	0	0	1	0	0	1	1	0	0	1	1	0	0	1	0	0	1	1	1	0	1	1	1	1	1	0	1	1	1	1	1	1	1	1	0	1
PHC1705		fms-related tyrosine kinase 3 ligand (FLT3LG)	2578.76	0.684211	39	0	0	1	0	1	1	1	1	1	1	1	0	1	1	1	1	0	1	1	0	0	1	0	1	1	1	1	0	1	1	1	1	0	0	1	1	1	1	1	1	0	0	1	1
BC017269.2	IOH29346	chromosome 10 open reading frame 47 (C10orf47)	2577.06	0.614035	35	0	0	0	0	1	1	1	0	0	1	0	0	1	1	1	0	0	1	0	0	0	0	0	1	1	1	1	0	1	0	1	1	0	0	1	0	1	0	1	1	1	1	1	1
NM_170672.1	IOH27295	RAS guanyl releasing protein 3 (calcium and DAG-regulated) (RASGRP3)	2565.22	0.649123	37	0	0	0	0	1	1	0	0	0	0	0	0	1	0	1	0	0	1	0	0	0	1	0	1	1	1	1	0	1	1	1	1	1	0	1	1	1	1	1	1	1	1	1	1
NM_006038.1	IOH14383	spermatogenesis associated 2 (SPATA2)	2562.59	0.701754	40	0	0	1	0	1	1	0	1	1	1	1	0	1	0	1	0	0	0	0	0	0	1	0	1	1	1	1	0	1	1	1	1	1	0	1	1	1	0	1	1	1	1	1	1
BC047327.1	IOH28830	ATP-dependent RNA helicase DHX8	2559.73	0.684211	39	0	0	1	0	1	0	1	0	1	1	1	1	0	1	1	0	0	1	0	0	0	1	0	0	1	1	1	0	0	1	1	1	1	1	1	0	1	1	1	1	1	1	1	1
BC001370.2	IOH3980	LIM and senescent cell antigen-like domains 2 (LIMS2)	2557.57	0.614035	35	0	0	0	0	1	1	0	0	0	1	1	0	1	1	1	0	0	1	0	0	0	1	0	1	1	1	1	0	1	1	0	1	1	0	1	0	1	0	1	1	1	1	0	1
BC033230.1	IOH23262	zinc finger protein 808 (ZNF808)	2555.92	0.666667	38	0	0	1	1	1	1	1	0	1	1	1	0	1	1	1	0	0	1	1	0	0	1	0	1	1	1	0	0	1	1	0	1	1	1	0	0	1	0	1	1	1	0	0	0
NM_014519.2	IOH40635	zinc finger protein 232 (ZNF232)	2554.62	0.684211	39	0	0	0	0	1	1	1	0	0	1	1	0	0	1	1	0	0	1	0	0	0	1	0	1	1	1	1	0	1	1	1	0	0	1	1	1	1	1	1	1	1	1	1	1
NM_003135.1	IOH59899	Signal recognition particle 19 kDa protein	2554.4	0.614035	35	0	0	0	0	1	1	1	0	0	1	0	0	1	0	1	0	0	1	1	0	0	0	0	0	1	1	1	0	1	1	1	1	1	0	1	0	1	0	1	1	1	0	1	1
NM_017614.3	IOH12877	betaine-homocysteine methyltransferase 2 (BHMT2)	2553.19	0.719298	41	0	0	0	0	1	1	1	0	0	0	0	0	1	1	1	1	0	1	1	0	0	1	0	1	1	1	1	0	1	1	1	1	1	0	1	1	1	1	1	1	1	1	1	1
NM_006398.2	IOH59996	Ubiquitin D	2553.13	0.631579	36	0	0	1	0	1	0	1	0	1	1	0	0	1	1	1	0	0	1	1	0	0	0	0	1	1	1	0	0	1	1	0	1	1	1	1	0	1	0	1	1	1	0	0	1
BC010662.1	IOH9725	leucine rich repeat (in FLII) interacting protein 1 (LRRFIP1)	2550.52	0.666667	38	0	0	0	0	1	1	0	1	0	0	1	0	1	0	1	1	0	1	1	0	0	1	0	1	1	1	1	0	1	1	1	1	0	0	1	1	1	0	1	1	1	1	1	1
BC050432.1	IOH26694	staufen, RNA binding protein, homolog 1 (Drosophila) (STAU1)	2548.5	0.649123	37	0	0	1	0	1	1	1	0	0	1	1	0	0	1	1	0	0	1	0	0	0	1	0	0	1	1	1	1	1	1	1	1	0	0	1	1	1	0	1	1	1	0	1	1
BC026030.1	IOH14611	zinc finger protein 239 (ZNF239)	2548.19	0.666667	38	0	0	0	0	1	1	1	0	0	1	0	0	1	0	1	0	0	0	0	0	0	1	0	1	1	1	1	0	1	1	1	1	1	1	1	1	1	0	1	1	1	1	1	1
NM_005440.3	IOH44761	Rho family GTPase 2 (RND2)	2546.1	0.666667	38	0	0	1	0	1	1	1	0	1	1	1	0	1	1	1	0	0	1	1	0	0	1	0	1	1	1	1	0	0	1	0	1	1	1	1	0	1	0	0	1	1	1	1	1
NM_014790.3	IOH14698	janus kinase and microtubule interacting protein 2 (JAKMIP2)	2544.32	0.631579	36	0	0	0	0	1	1	1	0	0	1	1	0	1	1	0	1	0	1	0	0	0	1	0	1	0	1	1	0	1	1	1	1	0	0	0	1	1	0	1	1	1	1	1	1
NM_006779.2	IOH14061	CDC42 effector protein (Rho GTPase binding) 2 (CDC42EP2)	2543.97	0.649123	37	0	0	0	0	1	1	1	0	0	1	1	0	1	1	1	0	0	1	0	0	0	1	0	0	1	1	1	1	1	1	0	1	0	0	1	1	1	0	1	1	1	1	1	1
NM_194290.1	IOH42276	cDNA FLJ42001 fis, clone SPLEN2029912 (LOC153684 protein) [Source:UniProtKB/TrEMBL;Acc:Q6ZVW3]	2543.16	0.631579	36	0	0	0	0	1	1	1	1	1	1	0	0	1	1	1	0	0	1	1	0	0	0	0	1	1	1	1	0	1	1	1	1	1	0	1	0	1	0	1	1	1	1	0	1
BC096708.1	IOH63336	Wilms tumor-associated protein	2538.63	0.736842	42	0	0	1	0	1	1	1	0	0	1	1	0	1	1	1	0	0	1	1	0	0	1	0	1	1	1	1	0	1	1	1	1	1	0	1	1	1	0	1	1	1	1	1	1
BC015586.2	IOH46065	laminin, gamma 1 (formerly LAMB2) (LAMC1)	2528.71	0.666667	38	0	0	0	0	1	1	1	0	0	0	0	0	1	1	1	0	0	1	0	0	0	1	0	1	1	1	1	0	1	1	1	1	1	0	1	1	1	1	1	1	1	0	1	1
BC036434.1	IOH62212	Serine/threonine-protein kinase VRK2	2525.58	0.631579	36	0	0	0	0	1	1	1	1	0	1	0	0	1	1	1	0	0	1	0	0	0	1	0	1	0	1	0	0	1	1	0	1	1	0	1	1	1	0	1	1	1	1	1	1
NM_139355.1	IOH4506	megakaryocyte-associated tyrosine kinase (MATK), transcript variant 1	2515.99	0.666667	38	0	0	0	0	1	1	1	0	0	1	0	0	1	1	1	0	0	1	0	0	0	1	0	1	1	1	1	0	1	1	1	1	1	0	0	1	1	0	1	1	1	1	1	1
NM_054012.1	IOH14007	argininosuccinate synthetase 1 (ASS1), transcript variant 2	2514.43	0.649123	37	0	0	0	0	1	0	0	0	1	1	1	0	1	1	1	1	0	1	1	0	0	1	0	1	1	1	0	0	1	1	0	1	1	1	0	1	1	0	1	1	0	1	1	0
NM_014077.1	IOH4219	family with sequence similarity 32, member A (FAM32A)	2513.37	0.614035	35	0	0	1	0	1	0	1	0	1	1	1	0	1	0	0	0	0	0	0	0	0	1	0	1	1	1	1	0	1	1	0	1	1	0	1	1	1	0	1	1	1	1	1	1
NM_004656.2	IOH4938	BRCA1 associated protein-1 (ubiquitin carboxy-terminal hydrolase) (BAP1)	2510.84	0.631579	36	0	0	0	0	0	1	1	1	1	1	0	0	1	1	1	0	0	1	0	0	0	0	0	1	1	1	1	0	0	1	1	1	0	0	1	1	1	1	1	1	1	1	0	1
BC095404.1	IOH62648	Protein transport protein Sec23B	2509.52	0.684211	39	0	0	1	0	0	1	1	0	0	1	1	0	0	1	1	0	0	1	1	0	0	1	0	1	1	1	0	1	1	1	1	0	1	1	0	1	1	0	1	1	1	1	1	1
BC036923.1	IOH25928	chromosome 9 open reading frame 150 (C9orf150)	2502.38	0.719298	41	0	0	0	0	1	1	1	1	0	1	0	0	1	1	1	0	0	1	1	0	0	0	0	1	1	1	1	0	1	1	1	1	1	0	1	1	1	1	1	1	1	1	1	1
BC007424.2	IOH6160	PRP4 pre-mRNA processing factor 4 homolog (yeast) (PRPF4)	2497.58	0.649123	37	0	0	0	0	1	0	0	0	0	0	1	0	1	1	1	0	0	1	0	0	0	1	0	1	1	1	1	0	1	1	1	1	1	1	1	1	1	0	1	1	1	1	1	1
NM_003092.3	IOH21977	small nuclear ribonucleoprotein polypeptide B'' (SNRPB2), transcript variant 1	2497.13	0.701754	40	0	0	0	0	1	0	1	1	0	1	1	0	1	1	1	0	0	1	0	0	0	0	0	1	1	1	1	0	1	1	1	1	1	1	1	1	1	0	1	1	1	1	1	1
BC026345.1	IOH10790	Ermin	2496.39	0.631579	36	0	0	0	0	0	1	0	0	1	1	1	0	0	1	1	1	0	1	1	0	0	1	0	1	1	1	0	1	0	1	0	1	1	1	1	1	1	1	1	1	1	1	0	0
BC047901.2	IOH28877	actinin, alpha 2 (ACTN2)	2495.84	0.631579	36	0	0	1	0	1	0	1	0	1	0	0	0	0	0	1	0	0	1	0	0	0	1	0	1	1	1	0	0	1	1	1	1	1	1	1	1	1	1	1	1	0	1	1	0
NM_145020.1	IOH22338	coiled-coil domain containing 11 (CCDC11)	2494.12	0.649123	37	0	0	0	1	1	1	1	0	0	1	0	0	0	1	1	0	0	1	0	0	0	1	0	1	1	1	1	0	1	1	1	1	1	1	1	1	1	0	0	1	0	1	1	1
NM_032476.1	IOH13845	mitochondrial ribosomal protein S6 (MRPS6), nuclear gene encoding mitochondrial protein	2493.01	0.684211	39	0	0	1	0	1	1	1	0	0	1	1	0	1	1	1	0	0	1	1	0	0	0	0	1	1	1	1	0	1	1	1	1	1	0	1	0	1	0	1	1	1	0	1	1
BC009348.2	IOH12064	cirrhosis, autosomal recessive 1A (cirhin) (CIRH1A)	2492.32	0.684211	39	0	0	0	0	1	1	1	1	0	1	1	0	1	1	1	0	0	1	0	0	0	1	0	1	1	1	1	0	1	1	0	1	1	0	1	1	1	0	1	1	1	1	1	1
BC067741.1	IOH61679	26S protease regulatory subunit 4	2491.15	0.666667	38	0	0	1	0	1	0	1	0	1	1	0	1	1	1	1	0	0	1	0	0	0	1	0	1	1	1	1	0	1	1	1	0	0	1	1	1	1	1	1	0	1	0	1	1
BC019902.1	IOH11985	coiled-coil domain containing 21 (CCDC21)	2487.33	0.631579	36	0	0	0	0	1	1	0	0	0	0	1	0	1	1	1	1	0	1	1	0	0	1	0	1	1	1	0	0	1	1	1	0	1	0	0	1	1	0	1	1	1	0	1	1
NM_004596.1	IOH6628	small nuclear ribonucleoprotein polypeptide A (SNRPA)	2480.63	0.719298	41	0	0	0	0	1	1	1	1	0	0	1	1	0	1	1	0	0	1	0	0	0	1	0	1	1	1	1	0	1	1	0	1	1	0	1	1	1	1	1	1	1	1	1	1
NM_002150.1	IOH14718	4-hydroxyphenylpyruvate dioxygenase	2476.48	0.631579	36	0	0	0	0	1	0	0	0	1	0	1	0	1	1	1	0	0	1	1	0	0	1	0	1	1	1	1	0	0	1	1	1	1	0	1	1	1	0	1	1	1	1	1	1
NM_013401.2	IOH10925	RAB3A interacting protein (rabin3)-like 1 (RAB3IL1)	2476.04	0.614035	35	0	0	1	0	1	1	1	0	1	0	1	0	0	1	1	1	0	1	0	0	0	1	0	1	1	1	0	0	0	0	1	1	1	1	1	1	1	0	0	1	0	1	1	0
BC000238.1	IOH4394	ankyrin repeat and zinc finger domain containing 1 (ANKZF1)	2472.75	0.666667	38	0	0	0	0	1	0	1	0	0	1	1	0	1	1	1	0	0	1	1	0	0	0	0	1	1	1	1	0	1	1	1	1	1	1	1	0	1	1	1	1	1	0	0	1
BC022524.1	IOH10757	fibroblast growth factor 12 (FGF12)	2472.38	0.614035	35	0	0	0	0	1	0	1	0	0	1	0	0	1	1	1	0	0	1	1	0	0	0	0	0	1	1	0	0	1	1	0	1	1	1	1	0	1	0	1	1	1	1	1	1
NM_014346.1	IOH22792	TBC1 domain family, member 22A (TBC1D22A)	2471.39	0.666667	38	0	0	1	0	1	1	1	0	1	1	1	0	0	1	1	0	0	1	1	0	0	1	0	1	1	1	0	0	1	0	0	1	1	1	1	1	1	0	1	1	0	1	1	0
NM_001031.4	IOH58930	40S ribosomal protein S28	2465.13	0.666667	38	0	0	0	0	1	1	1	0	0	1	0	0	1	1	1	0	0	1	1	0	0	0	0	1	1	1	0	0	1	1	1	1	1	0	1	1	1	0	1	1	1	1	1	1
BC037311.1	IOH27689	Voltage-dependent L-type calcium channel subunit beta-1	2464.99	0.614035	35	0	0	0	0	1	1	1	0	0	1	0	0	1	1	1	0	0	1	1	0	0	1	0	1	1	1	1	0	0	1	0	1	0	1	1	0	1	0	1	1	1	0	1	1
BC011885.1	IOH14206	eukaryotic translation initiation factor 2A, 65kDa (EIF2A)	2464.63	0.614035	35	0	0	0	0	1	1	1	0	0	1	0	0	1	1	1	0	0	1	1	0	0	0	0	0	1	1	0	0	1	1	1	1	0	0	1	1	1	0	1	1	1	0	1	1
BC032844.1	IOH61607	Angiogenic factor with G patch and FHA domains 1	2463.89	0.614035	35	0	0	0	0	1	1	0	0	0	1	1	0	1	1	0	0	0	1	0	0	0	0	0	1	1	1	1	0	1	1	1	1	1	0	0	1	1	0	1	1	1	1	1	1
BC007104.1	IOH7532	peptidylprolyl isomerase A (cyclophilin A) (PPIA)	2447.87	0.719298	41	0	0	0	0	1	0	1	1	0	1	1	0	1	1	1	0	0	1	1	0	0	0	0	1	1	1	1	0	1	1	1	1	1	1	1	1	1	0	1	1	1	1	1	1
BC035079.2	IOH27679	zinc finger, ZZ-type containing 3 (ZZZ3)	2447	0.666667	38	0	0	1	0	1	1	1	0	0	1	1	0	1	1	1	1	0	1	1	0	0	1	0	1	0	1	0	0	1	1	1	1	1	1	0	1	1	0	0	0	1	1	1	0
NM_032563.1	IOH40397	late cornified envelope 3D (LCE3D)	2446.49	0.684211	39	0	0	0	0	1	1	1	0	0	1	0	0	1	1	0	0	0	1	1	0	0	1	0	1	1	1	1	0	1	1	1	1	1	1	1	1	1	0	1	1	1	1	0	1
NM_145063.1	IOH13839	chromosome 6 open reading frame 130 (C6orf130)	2438.75	0.666667	38	0	0	0	0	1	0	1	0	0	1	0	0	1	1	1	0	0	1	1	0	0	0	0	0	1	1	1	0	1	1	1	1	1	1	1	1	1	0	1	1	1	1	1	1
BC021105.1	IOH14081	cutC copper transporter homolog (E. coli) (CUTC)	2429.43	0.614035	35	0	0	0	0	1	0	0	0	0	0	0	0	1	1	1	0	0	1	0	0	0	1	0	0	1	1	1	0	1	1	1	1	0	1	1	1	1	0	1	1	1	1	1	1
NM_000987.2	IOH45675	ribosomal protein L26 (RPL26)	2425.43	0.649123	37	0	0	0	0	1	1	1	1	0	1	1	0	0	1	0	0	0	1	0	0	0	1	0	1	1	1	0	0	1	1	1	1	1	0	1	1	1	0	1	1	1	1	1	1
NM_020529.1	IOH4138	nuclear factor of kappa light polypeptide gene enhancer in B-cells inhibitor, alpha (NFKBIA)	2425.39	0.666667	38	0	0	0	1	1	1	0	0	0	1	0	0	1	0	1	1	0	1	0	0	0	0	0	1	1	1	1	0	1	1	1	1	1	1	0	1	1	1	1	1	1	1	1	1
BC064145.1	IOH40031	CDK5 regulatory subunit associated protein 1-like 1 (CDKAL1)	2424.75	0.614035	35	0	0	0	0	1	1	1	0	0	0	0	0	1	1	0	0	0	0	0	0	0	1	0	1	1	1	1	0	1	1	1	1	1	0	1	1	1	1	1	1	1	1	0	1
NM_138820.1	IOH4234	HIG1 domain family, member 2A (HIGD2A)	2423.85	0.649123	37	0	0	0	0	1	1	0	0	0	1	0	0	1	1	1	1	0	1	1	0	0	1	0	1	1	1	1	0	1	1	1	1	1	0	0	1	1	0	1	1	1	1	1	0
NM_006804.2	IOH27296	StAR-related lipid transfer (START) domain containing 3 (STARD3)	2421.25	0.666667	38	0	0	0	0	1	1	1	0	0	1	0	0	0	0	1	0	0	1	0	0	0	1	0	1	1	1	1	0	1	1	1	1	0	1	1	1	1	1	1	1	1	1	1	1
NM_021104.1	IOH13630	ribosomal protein L41 (RPL41), transcript variant 1	2415.71	0.631579	36	0	0	0	0	1	1	1	0	0	0	0	0	1	1	1	0	0	1	1	0	0	0	0	0	1	1	1	0	1	1	1	1	1	0	1	0	1	0	1	1	1	1	1	1
NM_022048.1	IOH21026	casein kinase 1, gamma 1 (CSNK1G1)	2414.83	0.614035	35	0	0	0	0	1	1	1	0	0	1	0	0	1	1	1	0	0	1	0	0	0	0	0	1	1	1	1	0	1	0	1	1	1	1	1	1	1	0	1	1	1	1	0	1
NM_004664.2	IOH42498	lin-7 homolog A (C. elegans) (LIN7A)	2408.03	0.631579	36	0	0	0	0	1	1	0	1	0	1	0	0	1	1	1	0	0	1	0	0	0	1	0	0	1	1	1	0	1	1	1	1	1	1	0	1	0	1	1	1	1	0	1	1
NM_012191.1	IOH5628	N-acetyltransferase 6 (NAT6)	2406.25	0.666667	38	0	0	0	0	1	1	1	0	0	1	0	0	1	1	1	0	0	1	0	0	0	1	0	1	1	1	1	0	1	1	1	1	1	0	1	1	1	0	1	1	1	1	1	1
NM_006340.1	IOH52178	Brain-specific angiogenesis inhibitor 1-associated protein 2	2405.89	0.684211	39	0	0	0	1	1	1	0	1	0	1	1	0	1	1	1	0	0	1	0	0	0	1	0	0	1	1	1	0	0	1	1	1	1	0	1	1	1	0	1	1	1	1	1	1
NM_006755.1	IOH2052	transaldolase 1 (TALDO1)	2399.75	0.631579	36	0	0	0	0	1	1	0	0	0	1	0	0	0	1	1	0	0	1	0	0	0	1	0	0	1	1	1	1	1	1	1	1	1	1	0	1	1	1	1	1	1	0	1	1
NM_024068.1	IOH6654	oligonucleotide/oligosaccharide-binding fold containing 2B (OBFC2B)	2398.94	0.684211	39	0	0	0	0	1	1	1	0	0	1	0	0	1	1	1	0	0	1	1	0	0	1	0	0	1	1	1	0	1	1	1	1	1	0	1	1	1	0	1	1	1	1	1	1
BC011713.2	IOH22973	tRNA methyltransferase 12 homolog (S. cerevisiae) (TRMT12)	2395.33	0.649123	37	0	0	0	0	1	1	1	1	0	1	0	0	0	1	1	0	0	1	0	0	0	1	0	0	1	1	0	0	1	1	0	1	1	1	1	1	1	1	1	1	1	1	1	1
BC029760.1	IOH22119	OTU domain containing 6B (OTUD6B)	2394.35	0.684211	39	0	0	1	0	1	1	1	0	0	1	0	0	1	1	1	0	0	1	1	0	0	0	0	1	1	1	1	0	1	1	0	1	1	1	1	1	1	0	1	1	1	1	1	1
NM_003211.1	IOH27535	thymine-DNA glycosylase (TDG)	2393.85	0.666667	38	0	0	0	0	1	1	1	0	0	1	0	0	1	1	1	1	0	1	1	0	0	1	0	1	1	1	0	0	1	1	1	1	1	1	0	0	1	0	1	1	1	1	1	0
NM_178550.3	IOH59725	Coiled-coil domain-containing protein C1orf110	2383.23	0.701754	40	0	0	1	0	1	1	1	0	0	1	0	0	1	1	1	0	0	1	0	0	0	1	0	1	1	1	1	0	1	1	1	1	1	0	1	1	1	1	1	1	1	1	1	1
BC034692.1	IOH22176	anillin, actin binding protein (ANLN)	2379.99	0.701754	40	0	0	1	0	1	1	1	1	1	1	1	0	1	1	0	1	0	1	0	0	0	0	0	1	1	1	0	0	1	1	1	1	1	0	1	1	1	0	1	1	1	1	1	1
NM_012148.1	IOH39321	double homeobox, 3 (DUX3)	2379.99	0.701754	40	0	0	1	0	1	1	0	0	0	1	0	0	1	1	1	0	0	1	0	0	0	1	0	1	1	1	1	0	1	1	1	1	1	1	1	1	1	0	1	1	1	1	1	1
NM_207035.1	IOH41684	UPF0471 protein C1orf63 homolog	2379.46	0.649123	37	0	0	0	0	1	1	0	0	0	0	0	0	1	1	1	0	0	1	0	0	0	1	0	1	1	1	1	0	1	1	1	1	1	0	1	1	1	1	0	1	1	1	1	1
NM_002451.3	IOH54928	methylthioadenosine phosphorylase (MTAP), mRNA.	2377.08	0.614035	35	0	0	0	0	1	1	1	0	0	0	0	0	1	1	1	1	0	1	0	0	0	1	0	1	1	1	0	0	1	1	1	1	1	0	1	1	1	1	0	1	1	1	0	1
NM_001721.2	IOH11645	BMX non-receptor tyrosine kinase (BMX), transcript variant 2	2375.48	0.649123	37	0	0	1	0	1	1	1	0	1	1	0	0	1	1	1	0	0	1	0	0	0	0	0	0	1	1	1	0	1	1	1	1	1	1	0	1	0	1	1	1	1	1	1	1
NM_005024.1	IOH35680	serpin peptidase inhibitor, clade B (ovalbumin), member 10 (SERPINB10)	2365.61	0.649123	37	0	0	0	0	1	1	1	0	0	1	1	0	0	1	1	1	0	1	1	0	0	1	0	1	1	1	0	0	1	1	1	1	1	0	1	1	1	0	0	1	1	1	1	1
NM_080820.3	IOH54776	D-tyrosyl-tRNA(Tyr) deacylase 1	2364.79	0.649123	37	0	0	1	0	1	0	1	1	0	0	0	0	1	0	1	0	0	1	1	0	0	1	0	1	0	1	1	0	1	1	1	1	1	1	1	0	1	0	1	1	1	1	1	1
BC030702.1	IOH22356	microcephaly, primary autosomal recessive 1 (MCPH1)	2360.48	0.631579	36	0	0	0	0	1	0	0	0	0	0	0	0	1	0	1	0	0	1	0	0	0	1	0	1	1	1	1	0	1	1	1	1	1	1	1	0	1	1	1	1	1	1	1	1
BC019598.1	IOH10613	Zinc finger matrin-type protein 4	2356.9	0.666667	38	0	0	0	0	1	1	1	0	0	1	0	0	1	1	0	0	0	1	0	0	0	1	0	1	1	1	1	0	1	1	1	1	1	0	1	1	1	1	1	1	1	1	1	1
BC032508.1	IOH62199	PNMA-like 1, mRNA (cDNA clone MGC:45422 IMAGE:5246377), complete cds	2355.84	0.631579	36	0	0	0	0	1	1	1	0	0	1	0	0	1	1	1	0	0	1	0	0	0	1	0	1	1	1	1	0	1	1	0	1	1	1	0	0	1	0	1	1	1	1	0	1
BC010919.1	IOH27800	ribosomal protein L35 (RPL35)	2349.65	0.649123	37	0	0	0	0	1	1	1	0	0	1	0	0	1	1	1	0	0	1	0	0	0	1	0	1	1	1	1	0	1	1	1	1	1	0	1	1	1	0	1	1	1	0	1	1
BC029378.1	IOH23186	telomeric repeat binding factor (NIMA-interacting) 1 (TERF1)	2346.09	0.666667	38	0	0	0	1	1	1	1	0	0	0	0	0	1	1	1	0	0	1	0	0	0	1	0	1	1	1	1	0	1	1	1	1	1	0	1	1	1	0	1	1	1	1	1	1
BC000733.1	IOH4627	eukaryotic translation initiation factor 3, subunit G (EIF3S4)	2345.01	0.649123	37	0	0	0	0	1	1	1	1	0	1	1	0	1	1	0	0	0	1	0	0	0	1	0	1	1	1	0	0	1	1	1	1	1	0	1	1	1	0	1	1	1	1	1	0
BC070154.1	IOH63011	Non-histone chromosomal protein HMG-14	2340.83	0.614035	35	0	0	0	0	1	1	1	0	0	1	0	0	1	1	1	0	0	1	1	0	0	0	0	0	1	1	0	0	1	1	0	1	1	0	1	1	1	0	1	1	1	0	1	1
NM_002055.1	IOH9657	glial fibrillary acidic protein (GFAP)	2334.72	0.684211	39	0	0	0	0	1	1	0	0	0	1	0	0	1	1	1	1	0	1	0	0	0	1	0	1	0	1	1	0	1	1	1	1	1	1	1	1	1	1	1	1	1	1	1	1
NM_177966.3	IOH26825	2prime,5prime-phosphodiesterase 12	2332.11	0.666667	38	0	0	0	0	0	1	1	1	0	1	0	0	0	1	1	1	0	1	1	0	0	0	0	1	1	1	0	0	1	1	1	1	1	1	1	1	1	0	1	0	1	1	1	1
BC014665.1	IOH14248	alcohol dehydrogenase 5 (class III), chi polypeptide (ADH5)	2330.46	0.736842	42	0	0	0	0	1	1	1	1	0	1	1	0	1	1	1	0	0	1	0	0	0	1	0	1	1	1	0	0	1	1	1	1	1	0	1	1	1	1	1	1	1	1	1	1
NM_004602.2	IOH62672	Double-stranded RNA-binding protein Staufen homolog 1	2316.84	0.684211	39	0	0	0	1	1	1	1	0	0	1	0	0	1	1	1	0	0	1	0	0	0	1	0	1	1	1	0	1	1	1	0	1	1	0	1	1	1	0	1	1	1	1	1	1
BC016652.1		Cytoplasmic tyrosine-protein kinase BMX	2315.63	0.684211	39	0	0	0	0	1	1	1	0	0	0	0	0	1	1	1	0	0	1	0	0	0	1	0	1	1	1	1	0	1	1	1	1	1	0	1	1	1	1	1	1	1	1	1	1
NM_002629.2	IOH13682	phosphoglycerate mutase 1 (brain) (PGAM1)	2314.35	0.666667	38	0	0	0	0	1	1	1	1	0	1	0	0	1	1	1	1	0	1	1	0	0	1	0	1	1	1	0	0	1	1	1	1	1	1	1	1	1	0	0	0	1	1	1	0
BC002493.1	IOH3967	transcription factor 19 (SC1) (TCF19)	2314.09	0.649123	37	0	0	0	0	1	0	1	1	0	1	1	0	1	1	1	0	0	0	0	0	0	1	0	1	1	1	1	0	1	1	1	1	1	0	1	1	1	0	1	1	1	0	1	1
BC010467.1	IOH11119	cDNA clone MGC:17410 IMAGE:4156035, complete cds	2309.62	0.666667	38	0	0	0	0	1	1	1	0	0	1	0	0	1	1	1	0	0	1	1	0	0	0	0	1	1	1	1	0	1	1	1	1	1	0	1	1	1	1	1	1	1	0	1	0
NM_004394.1	IOH40583	death-associated protein (DAP)	2308.17	0.666667	38	0	0	1	0	1	1	1	0	1	0	0	0	1	1	1	1	0	1	1	0	0	0	0	1	1	1	1	0	1	1	1	1	0	0	1	1	1	1	1	0	1	0	1	1
NM_006573.2	IOH12947	tumor necrosis factor (ligand) superfamily, member 13b (TNFSF13B)	2304.92	0.701754	40	0	0	1	0	1	1	1	1	1	1	1	0	1	1	1	0	0	1	1	0	0	1	0	1	1	1	1	0	1	1	1	1	0	0	1	0	1	0	1	1	1	1	1	0
NM_002767.2	IOH42120	phosphoribosyl pyrophosphate synthetase-associated protein 2 (PRPSAP2)	2303.8	0.649123	37	0	0	0	0	0	1	0	1	0	0	0	0	1	0	1	0	0	1	0	0	0	1	0	1	1	1	1	0	1	1	1	1	1	1	1	1	1	1	1	1	1	1	1	1
NM_153035.1	IOH27410	chromosome 1 open reading frame 83 (C1orf83)	2302.67	0.684211	39	0	0	0	1	1	1	1	0	0	1	0	0	1	1	1	0	0	1	1	0	0	0	0	1	1	1	0	0	1	1	1	1	1	0	1	1	1	0	1	1	1	1	1	1
NM_020175.1	IOH13452	dihydrouridine synthase 3-like (S. cerevisiae) (DUS3L)	2302.29	0.684211	39	0	0	0	0	1	1	1	0	0	1	0	0	1	1	1	0	0	1	1	0	0	1	0	1	0	1	1	0	1	1	1	1	1	0	1	1	1	1	1	1	1	1	1	1
XM_088679.2	IOH43003	Spermatid nuclear transition protein 4	2300.83	0.666667	38	0	0	0	0	1	1	1	0	0	1	0	0	1	1	1	0	0	1	1	0	0	1	0	1	1	1	1	1	0	1	1	1	0	0	0	1	1	0	1	1	1	1	1	1
NM_001895.1		casein kinase 2, alpha 1 polypeptide (CSNK2A1), transcript variant 2	2300.56	0.631579	36	0	0	0	0	1	1	1	0	0	1	0	0	1	0	1	0	0	0	0	0	0	1	0	1	1	1	1	0	1	1	1	1	1	1	1	0	1	0	1	1	0	1	1	1
NM_033642.1	IOH36760	fibroblast growth factor 13 (FGF13), transcript variant 1B	2298.85	0.666667	38	0	0	1	0	1	1	1	1	1	1	0	0	1	1	1	0	0	1	0	0	0	0	0	1	1	1	1	0	1	1	0	1	1	1	0	1	1	0	1	1	1	1	1	1
BC040457.1	IOH26807	calcium/calmodulin-dependent protein kinase (CaM kinase) II alpha (CAMK2A)	2298.02	0.666667	38	0	0	0	0	1	1	1	1	0	1	0	0	0	1	1	0	0	1	0	0	0	1	0	0	1	1	1	0	1	1	1	1	1	1	0	1	1	1	1	1	1	1	1	1
BC062338.1	IOH40690	SET binding protein 1 (SETBP1)	2297.22	0.736842	42	0	0	1	1	1	1	1	0	1	1	0	0	0	1	1	0	0	1	0	0	0	1	0	1	1	1	1	0	1	1	1	1	1	1	1	1	1	0	1	1	1	1	1	1
BC025406.1	IOH11226	phosphodiesterase 4D interacting protein (myomegalin) (PDE4DIP)	2292.49	0.631579	36	0	0	1	0	1	1	1	0	1	1	1	0	1	1	1	0	0	1	1	0	0	0	0	1	1	1	1	1	1	0	0	1	1	0	1	0	1	1	1	0	1	1	1	0
NM_080588.1	IOH46132	protein tyrosine phosphatase, non-receptor type 7 (PTPN7), transcript variant 2	2291.65	0.649123	37	0	0	0	0	1	1	1	0	0	0	0	0	0	1	1	1	0	1	1	0	0	1	0	1	1	1	1	0	1	1	1	1	0	1	1	1	0	1	1	1	1	0	1	1
NM_005435.2	IOH14526	Rho guanine nucleotide exchange factor (GEF) 5 (ARHGEF5)	2286.89	0.666667	38	0	0	0	0	1	1	1	0	0	0	0	0	1	1	1	0	0	1	1	0	0	0	0	1	1	1	1	0	1	1	1	1	0	1	1	1	1	1	1	1	1	1	1	1
BC008808.2	IOH6341	excision repair cross-complementing rodent repair deficiency, complementation group 6-like (ERCC6L)	2286.45	0.614035	35	0	0	0	0	1	1	1	1	0	1	0	0	1	1	1	1	1	1	0	0	0	0	0	0	1	1	1	0	1	1	0	1	1	1	0	1	0	0	1	1	1	1	1	1
BC093661.1	IOH61968	Putative uncharacterized protein C14orf177	2282.89	0.614035	35	0	0	0	0	1	0	1	0	0	1	0	0	1	1	1	0	0	1	1	0	0	1	0	1	1	1	0	0	1	1	0	1	1	1	1	0	1	0	1	1	1	1	1	0
BC020221.1	IOH13291	SH3 and cysteine rich domain (STAC)	2280.35	0.684211	39	0	0	0	0	0	1	1	0	0	1	1	0	1	1	1	0	0	1	0	0	0	0	0	1	1	1	1	0	1	1	1	1	1	1	1	1	1	0	1	1	1	1	1	1
BC013331.1	IOH13858	H2A histone family, member Y (H2AFY)	2278.48	0.701754	40	0	0	1	0	1	1	1	0	1	1	0	0	1	1	1	0	0	1	1	0	0	1	0	1	0	1	1	0	1	1	1	1	1	0	1	1	1	0	1	1	1	1	1	1
BC050444.1	IOH26738	golgi autoantigen, golgin subfamily a, 4 (GOLGA4)	2276.86	0.649123	37	0	0	0	0	1	0	1	0	0	1	1	0	0	1	1	0	0	1	0	0	0	1	0	1	1	1	1	0	1	1	1	0	1	1	1	1	1	1	1	1	1	1	1	1
NM_020664.3	IOH9825	2,4-dienoyl CoA reductase 2, peroxisomal (DECR2)	2275.68	0.719298	41	0	0	1	0	1	1	1	0	1	1	0	0	1	1	1	0	0	1	0	0	0	1	0	1	0	1	1	0	1	1	1	1	1	1	1	1	1	1	1	1	1	1	1	1
NM_032786.1	IOH13275	zinc finger CCCH-type containing 10 (ZC3H10)	2275.18	0.649123	37	0	0	1	0	1	1	1	0	1	1	1	0	0	1	0	0	0	1	1	0	0	1	0	0	1	1	1	0	1	0	1	1	1	0	0	1	1	1	1	1	1	1	0	1
NM_006791.1	IOH3901	mortality factor 4 like 1 (MORF4L1), transcript variant 1	2274.18	0.684211	39	0	0	0	1	1	1	1	0	0	1	0	0	1	1	1	1	0	1	0	0	0	1	0	1	1	1	1	0	1	1	1	1	1	1	0	1	1	1	1	1	1	1	1	0
BC035348.1	IOH28673	cytoplasmic polyadenylation element binding protein 1 (CPEB1)	2268.19	0.701754	40	0	0	0	0	1	1	1	0	0	1	1	0	1	1	1	1	0	1	1	0	0	1	0	1	1	1	1	0	1	1	1	0	0	1	1	1	1	0	1	1	1	0	1	1
BC002582.2	IOH4120	ubiquitin protein ligase E3A (human papilloma virus E6-associated protein, Angelman syndrome) (UBE3A)	2267.64	0.631579	36	0	0	0	0	0	0	0	1	0	1	0	0	1	1	0	0	0	1	0	0	0	0	0	1	1	1	1	0	1	1	1	1	1	1	1	1	1	0	1	1	0	1	1	1
NM_033256.1	IOH13214	protein phosphatase 1, regulatory (inhibitor) subunit 14A (PPP1R14A)	2261.97	0.631579	36	0	0	1	0	1	1	1	0	1	0	0	0	1	1	1	0	0	1	0	0	0	1	0	1	1	1	1	0	1	1	1	1	1	0	1	1	1	0	0	1	1	0	1	0
BC014409.1	IOH13355	phosphopantothenoylcysteine decarboxylase (PPCDC)	2255.39	0.666667	38	0	0	0	0	1	1	1	1	0	1	1	0	1	1	1	0	0	1	1	0	0	1	0	0	1	1	1	0	1	1	1	1	1	1	0	1	0	1	1	1	1	0	1	1
BC037779.2	IOH27741	Zinc finger protein 165	2254.6	0.684211	39	0	0	0	0	1	1	1	0	0	1	0	0	1	1	1	0	0	1	0	0	0	1	0	1	0	1	1	0	1	1	1	1	1	0	1	1	1	1	1	1	1	1	1	1
BC031821.1	IOH22188	Secernin-3	2246.11	0.701754	40	0	0	0	0	1	1	1	1	0	1	0	0	1	0	1	0	0	1	1	0	0	1	0	1	1	1	1	0	1	1	1	1	1	0	1	1	1	1	1	1	1	1	1	1
NM_002093.2	IOH4507	glycogen synthase kinase 3 beta (GSK3B)	2245.26	0.666667	38	0	0	0	0	1	1	1	0	0	1	0	0	1	1	1	0	0	1	1	0	0	1	0	1	1	1	1	0	1	1	0	1	1	1	1	1	1	0	1	1	1	0	1	1
NM_001894.2	IOH21160	casein kinase 1, epsilon (CSNK1E), transcript variant 2	2244.12	0.666667	38	0	0	0	0	1	1	1	0	0	1	0	0	1	0	1	0	0	1	1	0	0	1	0	1	1	1	1	0	1	1	1	1	1	1	0	0	1	0	1	1	1	1	1	1
NM_005340.1	IOH3136	histidine triad nucleotide binding protein 1 (HINT1)	2238.9	0.666667	38	0	0	0	0	1	1	1	0	0	0	0	0	1	1	1	1	0	1	0	0	0	1	0	1	0	1	1	0	1	1	1	1	1	1	1	1	1	0	0	1	1	1	1	1
BC016825.1	IOH14707	spire homolog 1 (Drosophila) (SPIRE1)	2235.76	0.649123	37	0	0	0	0	1	1	1	0	0	1	0	0	1	1	1	0	0	1	1	0	0	1	0	1	1	1	0	0	1	1	1	1	1	0	1	1	1	1	1	1	1	1	1	1
NM_004397.3	IOH45655	Probable ATP-dependent RNA helicase DDX6	2235.43	0.614035	35	0	0	0	0	1	1	1	1	0	1	0	0	1	1	1	0	0	1	1	0	0	0	0	1	1	1	0	0	1	1	0	0	1	0	1	0	1	1	1	1	1	1	0	1
BC094726.1	IOH62681	Inositol polyphosphate 5-phosphatase OCRL-1	2231.17	0.614035	35	0	0	0	0	0	1	1	0	1	0	0	0	1	1	1	0	0	1	0	0	0	0	0	1	1	1	1	0	1	1	1	1	1	0	1	1	1	0	1	1	1	1	1	1
NM_006877.1	IOH6246	guanosine monophosphate reductase (GMPR)	2228.47	0.666667	38	0	0	1	0	1	1	1	0	0	0	0	0	0	1	1	1	0	1	1	0	0	1	0	1	1	1	0	0	1	1	1	1	0	0	1	1	1	0	1	1	1	1	1	1
XM_378582.2	IOH43485	PREDICTED: Homo sapiens hypothetical LOC400523 (LOC400523)	2223.69	0.614035	35	0	0	0	0	0	1	1	1	0	1	0	0	0	1	1	0	0	1	1	0	0	0	0	1	1	1	0	0	1	1	1	1	1	1	1	1	1	0	1	0	1	1	1	0
NM_004997.2	IOH26421	myosin binding protein H (MYBPH)	2220.79	0.701754	40	0	0	1	0	1	1	1	0	1	1	0	0	1	1	1	1	0	1	1	0	0	1	0	1	1	1	1	0	1	1	1	1	0	1	1	1	1	1	0	1	1	1	1	1
BC047438.1	IOH62395	Homer protein homolog 1	2217.02	0.649123	37	0	0	0	0	1	0	0	0	0	0	0	0	0	1	1	0	0	1	0	0	0	1	0	1	1	1	1	0	1	1	1	1	1	1	1	1	1	1	1	1	1	1	1	1
NM_020235.2	IOH44025	bobby sox homolog (Drosophila) (BBX)	2214.64	0.631579	36	0	0	0	0	1	0	1	0	0	1	0	0	1	1	1	0	0	1	1	0	0	1	0	1	1	1	0	0	1	1	0	1	1	1	0	0	1	0	1	1	1	1	1	1
NM_018325.1	IOH45695	chromosome 9 open reading frame 72 (C9orf72), transcript variant 1	2214.02	0.649123	37	0	0	0	0	1	1	1	0	0	1	0	0	1	1	1	1	0	1	1	0	0	0	0	1	1	0	1	0	1	0	1	1	0	0	1	1	1	1	1	1	1	1	1	1
BC001120.1	IOH3920	lectin, galactoside-binding, soluble, 3 (LGALS3)	2213.06	0.631579	36	0	0	0	0	1	1	1	0	0	1	1	0	0	1	0	0	0	0	1	0	0	1	0	0	1	1	1	0	1	1	1	1	1	1	1	1	1	0	1	1	1	1	0	1
BC031608.1	IOH22796	REST corepressor 3 (RCOR3)	2211.95	0.666667	38	0	0	0	0	1	1	1	0	0	1	1	0	1	1	1	0	0	1	1	0	0	1	0	1	1	1	1	1	1	0	1	1	1	0	1	0	1	0	1	1	1	1	1	1
NM_152992.1	IOH3431	POM121 and ZP3 fusion protein	2206.51	0.754386	43	0	0	0	0	1	1	1	1	0	1	1	0	1	1	1	1	0	1	1	0	0	1	0	1	1	1	1	0	1	1	1	1	0	1	1	1	1	0	1	1	1	1	1	1
NM_004013.1	IOH36376	dystrophin (muscular dystrophy, Duchenne and Becker types) (DMD), transcript variant Dp140	2201.48	0.649123	37	0	0	0	0	1	1	1	0	0	0	1	0	1	1	1	0	0	1	0	0	0	1	0	1	1	1	1	0	1	1	1	1	0	0	1	1	1	0	1	1	1	1	1	0
NM_015920.3	IOH57353	40S ribosomal protein S27-like protein	2199.17	0.614035	35	0	0	0	0	0	1	0	0	0	1	0	0	1	1	1	0	0	1	1	0	0	0	0	0	1	1	0	0	1	1	0	1	1	1	1	1	1	0	1	1	1	1	1	1
BC028295.1	IOH25815	peptidase D (PEPD)	2198.9	0.666667	38	0	0	0	0	1	1	1	0	0	1	0	0	1	1	1	1	0	1	1	0	0	1	0	1	1	1	1	0	1	0	1	1	0	0	0	1	1	0	1	1	1	1	1	1
BC023569.1	IOH27860	UPF3 regulator of nonsense transcripts homolog A (yeast) (UPF3A)	2189.54	0.649123	37	0	0	1	0	0	1	1	1	0	1	0	0	1	1	1	0	0	1	0	0	0	1	0	1	1	1	1	0	1	1	1	1	1	0	1	1	1	0	1	1	1	0	1	1
NM_138414.1	IOH10524	coiled-coil domain containing 101 (CCDC101)	2179.61	0.649123	37	0	0	0	0	1	1	1	1	1	1	0	0	1	1	1	0	0	1	0	0	0	0	0	0	0	1	1	0	1	1	1	1	1	0	1	1	1	0	1	1	1	1	1	1
NM_182665.1	IOH25788	Ras association (RalGDS/AF-6) domain family 5 (RASSF5), transcript variant 3	2179.31	0.666667	38	0	0	1	0	1	1	0	0	1	1	0	0	1	1	1	0	0	1	1	0	0	1	0	0	1	1	1	0	1	1	0	1	0	1	1	1	1	0	1	1	1	1	1	1
NM_024093.1	IOH3089	chromosome 2 open reading frame 49 (C2orf49)	2178.16	0.666667	38	0	0	1	1	1	1	1	1	0	0	1	0	1	0	1	0	0	1	0	0	0	1	0	1	1	1	1	1	1	1	1	1	1	0	1	1	1	0	1	1	1	1	0	1
NM_018158.1	IOH38323	solute carrier family 4 (anion exchanger), member 1, adaptor protein (SLC4A1AP)	2176.77	0.631579	36	0	0	0	0	1	1	0	1	0	1	0	0	1	1	1	0	0	1	0	0	0	1	0	0	1	1	1	0	0	1	1	1	1	1	0	1	1	1	1	1	1	1	0	1
BC000177.2	IOH2886	DnaJ (Hsp40) homolog, subfamily B, member 6 (DNAJB6)	2174.95	0.614035	35	0	0	0	0	1	1	1	0	0	1	0	0	1	1	1	0	0	1	0	0	0	0	0	0	1	1	1	0	1	1	1	1	1	1	0	1	0	0	1	1	1	1	1	1
BC096165.1	IOH59027	Troponin I, cardiac muscle	2174.25	0.614035	35	0	0	1	0	1	1	1	0	1	0	1	0	1	0	1	0	0	1	1	0	0	1	0	1	1	1	0	0	1	1	1	1	1	0	1	0	1	0	1	1	1	0	1	1
NM_003517.2	IOH29296	histone cluster 2, H2ac (HIST2H2AC)	2163.74	0.666667	38	0	0	1	0	1	0	1	0	1	1	0	0	1	1	1	0	0	1	1	0	0	0	0	0	1	1	1	0	1	1	1	0	1	1	1	1	1	0	1	1	1	0	1	1
NM_001028.2	IOH5471	ribosomal protein S25 (RPS25)	2159.1	0.614035	35	0	0	0	0	1	0	1	0	0	1	0	0	1	1	1	0	0	1	1	0	0	1	0	1	1	1	0	0	1	1	0	1	1	0	0	1	1	0	1	1	1	1	1	1
NM_024578.1	IOH23128	occludin/ELL domain containing 1 (OCEL1)	2156.68	0.631579	36	0	0	0	0	1	1	1	0	0	1	0	0	0	1	1	0	0	1	1	0	0	1	0	1	0	1	1	0	1	1	1	1	1	1	1	0	1	0	1	1	1	1	1	1
BC053664.1	IOH28996	zinc finger, FYVE domain containing 28 (ZFYVE28)	2144.2	0.701754	40	0	0	0	0	1	1	1	0	0	1	1	0	1	1	1	0	0	1	1	0	0	1	0	1	1	1	1	0	1	1	1	1	1	1	0	1	1	1	0	1	1	1	1	1
NM_002424.1	IOH45732	matrix metallopeptidase 8 (neutrophil collagenase) (MMP8)	2142.21	0.754386	43	0	0	1	0	1	1	1	0	0	1	1	0	0	1	1	1	0	1	1	0	0	1	0	1	1	1	1	0	1	1	1	1	1	0	1	1	1	1	1	1	1	1	1	1
NM_006105.3	IOH11287	Rap guanine nucleotide exchange factor 3	2136.61	0.614035	35	0	0	0	0	1	1	0	0	0	0	0	0	1	1	1	1	0	1	1	0	0	1	0	1	1	1	0	0	1	1	1	1	0	1	1	0	1	0	1	1	1	0	1	1
NM_144736.3	IOH40597	Protein midA homolog, mitochondrial	2135.34	0.684211	39	0	0	0	0	1	1	1	0	0	0	1	0	1	1	1	0	0	1	1	0	0	0	0	1	1	1	1	0	1	1	1	1	1	0	1	1	1	0	1	1	1	1	1	1
NM_053005.2	IOH40119	HCCA2 protein (HCCA2)	2131.01	0.631579	36	0	0	1	0	1	1	0	0	0	0	0	0	1	1	1	0	0	1	0	0	0	1	0	1	0	1	1	0	1	1	1	1	1	0	0	1	1	0	1	1	1	1	1	1
NM_003926.5	IOH59233	Methyl-CpG-binding domain protein 3	2129.93	0.649123	37	0	0	0	0	1	1	0	0	0	1	0	0	1	0	1	0	0	1	0	0	0	1	0	1	1	1	1	0	1	1	1	1	1	1	1	1	1	0	1	1	1	1	1	1
NM_018189.2	IOH45471	Developmental pluripotency-associated protein 4	2121.41	0.666667	38	0	0	1	0	1	0	0	0	1	1	0	0	1	0	1	0	0	1	0	0	0	0	0	1	1	1	1	0	1	1	1	1	1	1	1	1	1	0	1	1	1	1	1	1
BC043247.2	IOH28730	transducin-like enhancer of split 3 (E(sp1) homolog, Drosophila) (TLE3)	2117.8	0.614035	35	0	0	1	0	1	1	1	0	0	1	1	0	0	1	1	0	0	0	1	0	0	1	0	0	1	1	1	0	0	1	1	1	0	0	0	0	1	1	1	1	1	1	1	1
NM_001311.2	IOH5361	Cysteine-rich protein 1	2117.25	0.631579	36	0	0	1	0	1	1	1	0	0	1	0	0	1	1	1	0	0	1	1	0	0	1	0	1	0	1	0	0	1	1	0	1	1	1	1	1	1	0	0	1	1	1	0	0
NM_205848.1	IOH43389	synaptotagmin VI (SYT6)	2116.17	0.719298	41	0	0	1	0	1	1	1	0	0	1	1	0	1	1	1	0	0	1	1	0	0	1	0	1	1	1	0	0	1	1	1	1	1	0	1	1	1	0	1	1	1	1	1	1
BC012760.2	IOH62834	Glycogen synthase kinase-3 beta	2110.96	0.614035	35	0	0	0	0	1	1	1	0	0	0	0	0	1	1	1	0	0	1	1	0	0	0	0	0	1	1	0	0	1	1	0	1	1	0	1	1	1	0	1	1	1	1	1	1
BC032587.1	IOH21953	tubby like protein 3 (TULP3)	2110.75	0.666667	38	0	0	0	0	1	1	0	0	0	1	0	0	1	1	0	0	0	1	0	0	0	1	0	0	1	1	1	0	1	1	1	1	1	1	1	1	1	1	1	1	1	1	1	1
NM_005720.1	IOH3992	actin related protein 2/3 complex, subunit 1B, 41kDa (ARPC1B)	2109.29	0.614035	35	0	0	0	0	1	1	1	0	0	1	0	0	1	1	1	0	0	1	0	0	0	0	0	0	0	1	1	0	1	1	1	1	1	1	1	0	1	0	1	1	1	1	1	1
BC023567.2	IOH46137	cytokine receptor-like factor 3 (CRLF3)	2105.27	0.631579	36	0	0	1	0	1	0	1	0	0	1	1	0	1	0	1	0	0	0	0	0	0	1	0	1	1	1	0	1	1	1	1	1	1	1	1	1	1	0	1	1	1	1	0	1
NM_002095.1	IOH22963	general transcription factor IIE, polypeptide 2, beta 34kDa (GTF2E2)	2102.08	0.701754	40	0	0	1	0	1	1	1	0	0	1	0	0	1	1	1	0	0	1	1	0	0	1	0	1	1	1	1	0	1	1	1	1	1	0	0	0	1	1	1	1	1	1	1	1
NM_014370.2	IOH60262	SFRS protein kinase 3 (SRPK3)	2102.04	0.631579	36	0	0	0	0	0	1	1	0	0	1	0	0	1	0	1	0	0	0	0	0	0	1	0	1	1	1	1	0	1	1	1	1	1	1	1	1	1	1	1	1	1	1	1	1
NM_021130.1	IOH4329	peptidylprolyl isomerase A (cyclophilin A) (PPIA)	2096.85	0.684211	39	0	0	0	0	1	1	1	0	0	1	1	0	1	0	1	0	0	1	1	0	0	0	0	1	1	1	1	0	1	1	1	1	1	0	1	1	1	1	1	1	1	1	1	1
BC035137.1	IOH27698	thyroid hormone receptor, alpha (erythroblastic leukemia viral (v-erb-a) oncogene homolog, avian) (THRA)	2092.58	0.631579	36	0	0	1	0	1	1	1	0	0	0	0	0	1	0	0	0	0	1	0	0	0	1	0	1	0	1	1	0	1	1	1	1	1	1	1	1	1	0	1	1	1	1	1	1
NM_032204.3	IOH12073	activating signal cointegrator 1 complex subunit 2 (ASCC2)	2088.74	0.649123	37	0	0	0	0	1	1	1	0	0	1	1	0	1	1	1	0	0	1	1	0	0	1	0	0	0	1	0	0	1	1	1	1	1	1	1	0	1	0	1	1	0	1	1	1
BC007401.2	IOH5852	cell division cycle 25 homolog A (S. pombe) (CDC25A)	2086.97	0.649123	37	0	0	0	0	1	1	0	0	0	1	0	0	0	1	0	0	0	1	1	0	0	0	0	1	1	1	1	0	1	1	1	1	1	1	1	1	1	1	1	1	1	1	1	1
NM_021630.4	IOH57204	PDZ and LIM domain protein 2	2082.97	0.666667	38	0	0	0	0	1	1	1	0	0	1	0	0	0	1	1	0	0	1	0	0	0	1	0	0	1	1	1	0	1	1	1	1	1	1	1	1	1	1	1	1	1	1	1	1
NM_000159.2	IOH4104	glutaryl-Coenzyme A dehydrogenase (GCDH), nuclear gene encoding mitochondrial protein, transcript variant 1	2079.64	0.684211	39	0	0	0	0	1	1	1	0	0	0	1	0	1	1	1	0	0	1	1	0	0	1	0	1	1	1	1	0	1	1	1	1	1	0	1	1	1	1	1	1	1	1	1	1
NM_005733.1	IOH13299	kinesin family member 20A (KIF20A)	2077.5	0.614035	35	0	0	0	0	0	1	0	0	0	1	0	0	1	1	1	0	0	1	1	0	0	1	0	0	1	1	1	0	1	1	1	1	0	0	1	1	1	1	1	1	1	0	1	1
NM_182739.1	IOH44393	NADH dehydrogenase (ubiquinone) 1 beta subcomplex, 6, 17kDa (NDUFB6), nuclear gene encoding mitochondrial protein, transcript variant 2	2077.01	0.631579	36	0	0	0	0	1	1	0	0	0	1	0	0	1	1	1	0	0	0	0	0	0	1	0	1	1	1	1	0	1	1	1	1	0	1	1	1	1	1	0	1	1	1	1	1
NM_033137.1	IOH43469	fibroblast growth factor 1 (acidic) (FGF1), transcript variant 3	2076.37	0.684211	39	0	0	0	0	1	1	1	0	0	1	0	0	0	1	1	0	0	1	1	0	0	0	0	1	1	1	1	0	1	1	1	1	1	0	1	1	1	1	1	1	1	1	1	1
NM_006214.2	IOH22535	phytanoyl-CoA 2-hydroxylase (PHYH), transcript variant 1	2066.12	0.631579	36	0	0	0	0	1	1	1	0	0	1	0	0	1	1	1	0	0	1	0	0	0	0	0	1	1	1	1	0	1	1	1	1	1	1	1	0	1	0	1	1	1	1	1	1
BC009623.1	IOH9844	nucleophosmin (nucleolar phosphoprotein B23, numatrin) (NPM1)	2065.28	0.614035	35	0	0	0	0	1	1	1	0	0	1	0	0	1	0	1	0	0	1	1	0	0	0	0	1	1	1	1	0	1	1	1	1	1	0	1	1	1	0	1	1	1	0	1	1
PV4343		serine/threonine kinase 33	2062.38	0.614035	35	0	0	1	0	1	1	1	1	1	1	0	0	0	1	0	0	0	1	0	0	0	1	0	1	0	1	1	0	1	1	1	1	1	0	1	1	1	0	1	1	0	1	1	1
NM_153332.2	IOH27323	three prime histone mRNA exonuclease 1 (THEX1)	2049.66	0.649123	37	0	0	0	0	1	1	1	0	0	1	0	0	1	0	1	1	0	1	0	0	0	1	0	0	1	1	1	0	1	1	0	1	1	0	1	1	1	0	1	1	1	1	1	1
NM_002793.2	IOH27925	proteasome (prosome, macropain) subunit, beta type, 1 (PSMB1)	2048.69	0.614035	35	0	0	0	0	0	1	1	0	0	1	0	0	0	0	0	0	0	0	0	0	0	1	0	1	1	1	1	0	1	1	1	1	1	1	1	1	1	1	1	1	1	1	1	1
NM_024309.2	IOH40586	TNFAIP3 interacting protein 2 (TNIP2)	2046.54	0.701754	40	0	0	0	0	0	1	1	0	1	0	0	0	0	1	1	1	0	1	1	0	0	1	0	1	1	1	1	0	1	1	1	1	1	0	1	1	1	1	1	1	1	1	1	1
NM_212530.1	IOH45821	cell division cycle 25B (CDC25B), transcript variant 5	2043.82	0.649123	37	0	0	0	0	1	1	1	0	0	1	0	0	1	1	1	0	0	1	0	0	0	1	0	1	1	1	1	0	1	1	1	1	1	1	1	1	1	1	1	1	1	1	0	1
BC036089.1	IOH27267	myeloid/lymphoid or mixed-lineage leukemia (trithorax homolog, Drosophila); translocated to, 3 (MLLT3)	2041.89	0.649123	37	0	0	0	0	1	1	1	1	0	0	0	0	1	1	1	0	0	1	0	0	0	1	0	0	0	1	1	0	1	1	1	1	1	1	1	1	1	0	1	1	1	1	1	1
BC011668.1		Casein kinase II subunit alpha	2036.39	0.631579	36	0	0	0	0	1	1	1	0	0	1	1	0	1	0	1	0	0	1	1	0	0	0	0	1	0	1	1	0	1	1	1	1	1	1	1	0	1	0	1	1	1	1	1	1
NM_015015.1	IOH53632	JmjC domain-containing histone demethylation protein 3B	2033	0.614035	35	0	0	1	0	1	1	1	1	1	1	0	0	1	1	1	0	0	1	0	0	0	0	0	1	1	1	0	1	0	0	0	1	0	0	0	1	1	1	1	0	1	1	1	0
NM_020239.2	IOH21482	CDC42 small effector 1 (CDC42SE1), transcript variant 2	2031.43	0.649123	37	0	0	0	0	1	1	0	0	0	0	1	0	1	0	0	0	0	1	1	0	0	1	0	1	1	1	1	0	1	1	1	1	1	0	1	0	1	1	1	1	1	1	1	1
NM_016483.3	IOH22255	PHD finger protein 7 (PHF7), transcript variant 1	2031.25	0.666667	38	0	0	0	0	1	1	1	0	0	1	0	0	1	1	1	0	0	1	0	0	0	1	0	0	1	1	1	0	1	1	1	1	1	0	1	1	1	0	1	1	1	1	1	1
BC013366.2	IOH27815	UNC-112 related protein 2 (URP2)	2024.82	0.736842	42	0	0	0	0	1	1	1	1	0	1	0	0	1	0	1	1	0	1	1	0	0	1	0	1	1	1	1	0	1	1	1	1	0	1	1	1	1	1	1	1	1	1	1	1
NM_014009.2	IOH43597	forkhead box P3 (FOXP3)	2019.29	0.631579	36	0	0	0	0	1	1	1	0	0	1	0	0	1	1	1	0	0	1	0	0	0	1	0	0	1	1	1	0	1	1	1	1	1	1	0	1	0	0	1	1	1	1	1	1
NM_017817.1	IOH12515	RAB20, member RAS oncogene family (RAB20)	2012.72	0.631579	36	0	0	0	0	1	0	1	0	0	1	0	0	1	1	1	1	0	1	0	0	0	1	0	1	1	1	0	0	1	1	1	0	1	1	0	1	1	0	1	1	1	1	1	1
NM_002266.2	IOH54048	Importin subunit alpha-2	2010.48	0.684211	39	0	0	1	0	1	1	1	1	0	1	1	0	1	0	1	0	0	1	0	0	0	1	0	1	1	1	1	0	1	1	1	0	0	1	1	1	1	1	1	1	1	0	1	1
NM_006012.2	IOH4910	Putative ATP-dependent Clp protease proteolytic subunit, mitochondrial	2000.29	0.614035	35	0	0	0	0	0	0	1	0	0	0	0	0	0	1	1	0	0	1	1	0	0	0	0	0	1	1	1	0	1	1	1	1	1	1	1	1	1	1	1	1	1	1	0	1
BC050704.1	IOH27028	doublecortin domain containing 2 (DCDC2)	1995.58	0.614035	35	0	0	0	0	1	1	1	1	0	1	1	0	1	0	1	0	0	1	0	0	0	1	0	1	0	1	1	0	1	1	1	1	1	1	1	1	1	0	1	1	0	1	1	1
NM_005022.2	IOH58967	Profilin-1	1991.26	0.649123	37	0	0	0	0	1	1	1	0	0	1	0	0	1	1	1	0	0	1	0	0	0	1	0	1	0	1	1	1	1	1	1	1	1	1	1	1	1	0	0	1	0	1	1	1
BC007581.1	IOH6857	aldehyde dehydrogenase 4 family, member A1 (ALDH4A1)	1987.9	0.631579	36	0	0	0	0	1	0	1	0	0	1	0	0	0	1	0	1	0	1	1	0	0	1	0	0	1	1	1	0	1	1	1	1	1	1	1	1	1	0	1	1	1	1	0	1
BC002680.1	IOH5302	thyroid hormone receptor interactor 6 (TRIP6)	1982.29	0.614035	35	0	0	0	1	0	1	1	0	0	0	1	0	0	0	1	0	0	1	0	0	0	1	0	1	1	1	1	0	1	1	1	0	0	1	1	1	1	1	1	1	1	1	1	0
NM_201278.1	IOH45482	myotubularin related protein 2 (MTMR2), transcript variant 2	1975.25	0.631579	36	0	0	0	0	1	1	1	1	0	1	1	0	0	0	1	1	0	1	0	0	0	1	0	0	1	1	1	0	1	1	0	1	1	1	1	1	1	0	1	1	0	1	1	1
NM_001011658.1	IOH12376	trafficking protein particle complex 2 (TRAPPC2), transcript variant 1	1972.72	0.614035	35	0	0	0	0	1	1	1	0	0	0	0	0	1	1	1	0	0	1	1	0	0	1	0	0	1	1	1	0	1	1	1	1	0	0	1	1	1	1	1	1	1	0	1	1
NM_139062.1	IOH23025	casein kinase 1, delta (CSNK1D), transcript variant 2	1971.49	0.649123	37	0	0	0	0	1	1	1	0	0	1	0	0	1	1	1	0	0	1	0	0	0	1	0	1	0	1	0	0	1	1	1	1	1	0	1	1	1	0	1	1	1	1	1	1
BC031828.1	IOH22203	kinesin heavy chain member 2A (KIF2A)	1967.2	0.631579	36	0	0	0	0	1	1	1	0	0	0	1	0	1	1	1	0	0	1	1	0	0	0	0	1	1	1	0	0	1	1	1	1	1	0	1	0	1	0	1	1	1	1	1	1
NM_019067.1	IOH13693	guanine nucleotide binding protein-like 3 (nucleolar)-like (GNL3L)	1966.68	0.614035	35	0	0	0	0	1	1	0	1	0	1	0	0	1	0	1	0	0	1	0	0	0	0	0	0	1	1	1	0	1	1	0	1	1	0	1	1	1	0	1	1	1	1	1	1
NM_007375.3	IOH45677	TAR DNA binding protein (TARDBP)	1960.18	0.649123	37	0	0	0	0	0	1	1	0	0	0	0	0	0	1	1	1	0	1	1	0	0	0	0	1	1	1	0	0	1	1	1	1	1	1	1	1	1	1	1	0	1	1	1	1
NM_080660.2	IOH6727	zinc finger CCCH-type, antiviral 1-like (ZC3HAV1L)	1958.38	0.631579	36	0	0	0	0	1	1	1	0	0	0	0	0	1	1	1	0	0	1	0	0	0	1	0	1	1	1	1	0	1	1	1	1	1	0	1	1	1	1	0	1	1	0	1	1
BC043581.1	IOH26300	keratin 36 (KRT36)	1956.65	0.649123	37	0	0	0	0	1	1	0	0	0	0	0	0	0	0	1	0	0	1	0	0	0	0	0	1	1	1	1	0	1	1	1	1	1	1	1	1	1	1	1	1	1	1	1	1
NM_015891.2	IOH44384	cell division cycle 40 homolog (S. cerevisiae) (CDC40)	1949.61	0.614035	35	0	0	0	0	1	1	1	1	0	1	1	0	1	0	0	0	0	0	0	0	0	1	0	1	1	1	1	0	1	1	0	1	1	0	1	1	1	0	1	1	1	1	1	1
NM_007255.1	IOH5828	xylosylprotein beta 1,4-galactosyltransferase, polypeptide 7 (galactosyltransferase I) (B4GALT7)	1946.37	0.666667	38	0	0	0	0	1	1	1	0	0	1	1	0	0	1	0	0	0	0	1	0	0	1	0	1	1	1	1	1	1	1	1	1	0	0	0	1	1	1	1	1	1	1	1	1
NM_014065.2	IOH43942	Protein asteroid homolog 1	1946.09	0.631579	36	0	0	1	0	1	1	0	0	0	1	0	0	1	1	1	0	0	1	0	0	0	0	0	0	1	1	1	0	1	1	1	1	1	1	0	1	1	1	1	1	1	0	1	1
BC098112.1	IOH63324	Histone H2B type 1-N	1942.85	0.649123	37	0	0	0	0	1	1	0	0	0	1	0	0	1	1	1	0	0	1	1	0	0	1	0	0	1	1	1	0	1	1	0	1	1	0	1	1	1	0	1	1	1	1	1	1
NM_016011.2	IOH53949	Trans-2-enoyl-CoA reductase, mitochondrial	1942.18	0.614035	35	0	0	0	0	1	1	0	0	0	1	1	0	0	1	1	0	0	1	0	0	0	1	0	1	1	1	1	0	0	1	1	1	0	1	0	1	0	1	1	1	1	1	1	1
BC012887.1	IOH25768	Nucleolar and spindle-associated protein 1	1940.32	0.631579	36	0	0	0	0	1	1	1	0	0	1	0	0	1	0	1	0	0	1	0	0	0	1	0	1	0	1	1	0	1	1	1	1	1	0	1	1	1	0	1	1	1	1	1	1
NM_016606.2	IOH40596	receptor accessory protein 2 (REEP2)	1937.18	0.614035	35	0	0	0	0	1	1	1	0	0	1	0	0	0	1	1	0	0	0	0	0	0	1	0	1	1	1	1	0	1	1	1	1	1	0	0	1	1	0	1	1	1	1	1	1
BC101406.1	IOH63592	heart and neural crest derivatives expressed 2, mRNA (cDNA clone MGC:125303 IMAGE:40003700), complete cds	1929.12	0.631579	36	0	0	0	0	1	1	1	0	0	1	0	0	1	0	1	0	0	1	0	0	0	0	0	1	1	1	1	0	1	1	1	1	1	1	1	0	1	0	1	1	1	1	1	1
NM_144595.1	IOH25832	SLAIN motif family, member 1 (SLAIN1), transcript variant 2	1926.95	0.649123	37	0	0	0	0	1	0	1	0	0	1	0	0	0	1	1	0	0	1	0	0	0	1	0	1	1	1	1	0	1	1	1	0	1	1	1	0	1	1	1	1	1	1	1	1
NM_145909.1	IOH45888	Zinc finger protein 323	1926.74	0.649123	37	0	0	0	0	1	0	1	0	0	1	1	0	1	1	1	0	0	1	1	0	0	1	0	1	0	1	0	0	1	1	0	1	1	1	0	1	1	0	1	1	1	1	1	1
BC026213.1	IOH11042	F-box/WD repeat-containing protein 11	1925.39	0.736842	42	0	0	0	0	1	1	1	0	0	1	1	0	1	0	1	0	0	1	0	0	0	1	0	1	1	1	1	0	1	1	1	1	1	1	1	1	1	1	1	1	1	1	1	1
NM_014473.2	IOH9851	DIM1 dimethyladenosine transferase 1-like (S. cerevisiae) (DIMT1L)	1920.82	0.631579	36	0	0	0	0	1	1	1	0	0	1	0	0	1	1	1	0	0	1	0	0	0	0	0	0	1	1	1	0	1	1	1	1	1	1	0	1	1	1	1	1	1	1	1	1
NM_020961.2	IOH6104	KIAA1627 protein (KIAA1627)	1920.26	0.649123	37	0	0	0	0	1	0	1	0	0	1	0	0	1	1	1	0	0	1	0	0	0	1	0	1	1	1	1	0	1	1	1	1	1	0	1	1	1	0	1	1	1	1	0	1
BC005371.1	IOH7357	N-acetylglucosamine kinase (NAGK)	1916.97	0.631579	36	0	0	0	0	1	1	1	0	0	0	0	0	1	1	1	0	0	1	0	0	0	1	0	1	1	1	1	0	1	1	1	1	1	1	1	1	1	0	1	1	0	1	1	0
BC001935.1	IOH5068	cyclin-dependent kinase inhibitor 1A (p21, Cip1) (CDKN1A)	1907.27	0.666667	38	0	0	0	0	1	1	0	0	0	1	0	0	1	1	1	0	0	1	0	0	0	1	0	0	1	1	1	0	1	1	1	1	1	1	1	1	1	1	1	1	1	1	1	1
NM_001790.2	IOH14569	cell division cycle 25 homolog C (S. pombe) (CDC25C), transcript variant 1	1904.65	0.649123	37	0	0	0	0	1	1	1	0	0	0	0	0	1	1	0	0	0	1	0	0	0	1	0	1	1	1	1	0	1	1	1	1	1	1	1	1	1	0	0	1	1	1	1	1
NM_006299.2	IOH12838	zinc finger protein 193 (ZNF193)	1902.68	0.631579	36	0	0	0	0	1	1	0	0	0	0	0	0	1	1	1	0	0	1	1	0	0	1	0	1	1	1	1	0	1	1	1	1	1	1	1	0	1	0	1	1	1	0	1	1
NM_015833.1	IOH38242	adenosine deaminase, RNA-specific, B1 (RED1 homolog rat) (ADARB1), transcript variant 2	1902.44	0.614035	35	0	0	0	0	1	1	1	0	0	1	0	0	1	1	0	0	0	1	1	0	0	1	0	1	0	1	1	0	1	1	1	1	0	0	0	0	1	0	1	1	1	1	1	1
NM_013313.3	IOH43282	yippee-like 1 (Drosophila) (YPEL1)	1888.75	0.614035	35	0	0	0	0	1	1	1	0	0	1	0	0	1	1	1	0	0	1	0	0	0	1	0	1	1	1	1	0	1	1	0	1	1	1	0	1	1	0	1	1	1	0	1	1
NM_017411.2	IOH10903	survival of motor neuron 2, centromeric (SMN2), transcript variant d	1888.07	0.666667	38	0	0	0	0	1	1	1	1	0	1	0	0	1	1	1	0	0	1	0	0	0	1	0	1	0	1	1	0	1	1	1	1	0	1	1	1	1	0	1	1	1	1	1	1
NM_006439.3	IOH12221	Protein mab-21-like 2	1887	0.631579	36	0	0	0	0	1	0	1	0	0	1	0	0	1	1	1	0	0	1	0	0	0	0	0	1	1	1	1	0	1	1	1	1	1	0	0	0	1	1	1	1	1	1	1	1
NM_178821.1	IOH22298	WD repeat domain 69 (WDR69)	1885.18	0.631579	36	0	0	0	0	1	1	1	1	0	0	0	0	1	1	1	0	0	1	0	0	0	1	0	0	0	1	1	0	1	1	1	1	1	1	1	1	1	0	0	1	1	1	1	1
BC048099.1	IOH26742	zinc finger and SCAN domain containing 1 (ZSCAN1)	1885.12	0.701754	40	0	0	0	0	1	0	1	0	0	1	0	0	1	1	1	0	0	1	0	0	0	1	0	0	1	1	1	0	1	1	1	1	1	1	1	1	1	1	1	1	1	1	1	1
NM_023039.2	IOH11016	ankyrin repeat, family A (RFXANK-like), 2 (ANKRA2)	1879.75	0.649123	37	1	0	0	0	1	1	1	0	0	0	0	0	1	0	1	0	0	1	0	0	0	1	0	1	1	1	1	0	1	1	1	1	1	0	1	1	1	1	1	1	1	1	0	1
BC034435.1	IOH21500	zinc finger CCCH-type containing 3 (ZC3H3)	1879.67	0.631579	36	0	0	0	0	1	1	0	0	0	0	0	0	1	1	1	0	0	1	1	0	0	1	0	1	1	1	1	0	1	1	1	1	0	1	1	0	1	0	1	1	1	0	1	1
NM_207647.1	IOH21757	fibronectin type III and SPRY domain containing 1-like (FSD1L), transcript variant 1	1878.76	0.684211	39	0	0	0	0	1	1	1	1	0	1	1	0	1	1	1	0	0	1	1	0	0	1	0	1	1	1	0	0	1	1	1	1	0	0	0	1	1	0	1	1	1	1	1	1
NM_177524.1	IOH45900	mesoderm specific transcript homolog (mouse) (MEST), transcript variant 2	1860.77	0.614035	35	0	0	0	0	1	1	1	0	0	0	0	0	1	1	0	0	0	0	0	0	0	0	0	0	1	1	1	0	1	1	1	1	1	0	1	1	1	1	1	1	1	1	1	1
BC008748.2	IOH5941	protein-L-isoaspartate (D-aspartate) O-methyltransferase (PCMT1)	1860.27	0.631579	36	0	0	0	0	1	1	1	0	0	0	1	0	0	1	1	0	0	1	1	0	0	0	0	1	1	1	1	0	1	1	1	1	1	0	1	1	1	0	1	1	1	1	1	0
NM_007362.2	IOH3243	nuclear cap binding protein subunit 2, 20kDa (NCBP2), transcript variant 1	1859.26	0.614035	35	0	0	0	0	1	1	0	0	0	1	1	0	0	0	1	0	0	1	0	0	0	0	0	1	1	1	1	0	0	1	1	1	1	1	1	1	1	0	1	1	1	1	1	1
BC032485.1	IOH21724	apoptosis-inducing factor, mitochondrion-associated, 3 (AIFM3)	1857.12	0.631579	36	0	0	0	0	1	0	1	0	0	1	1	0	1	1	1	0	0	1	1	0	0	1	0	1	1	1	0	0	1	1	0	1	1	1	1	0	1	0	1	1	1	0	0	1
NM_018696.1	IOH12628	elaC homolog 1 (E. coli) (ELAC1)	1855.39	0.649123	37	0	0	0	0	1	1	0	0	0	1	1	0	1	1	1	0	0	1	1	0	0	0	0	1	1	1	0	0	1	1	1	1	1	1	1	1	1	0	1	1	1	1	1	1
BC041876.1	IOH27738	tau tubulin kinase 2 (TTBK2)	1850.54	0.631579	36	0	0	0	0	1	1	1	0	0	0	0	0	0	1	1	0	0	1	1	0	0	1	0	0	0	1	1	0	1	1	1	1	1	0	1	1	1	0	1	1	1	1	1	1
BC001778.1	IOH4907	uroporphyrinogen decarboxylase (UROD)	1846.96	0.649123	37	0	0	0	0	1	1	1	1	0	0	0	0	0	1	1	0	0	1	1	0	0	1	0	1	1	1	0	0	1	1	1	1	0	0	1	1	1	0	1	1	1	1	1	1
BC007347.2	IOH5863	chromodomain helicase DNA binding protein 2 (CHD2)	1844.62	0.666667	38	0	0	0	0	1	0	1	0	1	1	1	0	0	1	1	0	0	1	0	0	0	1	0	1	0	1	0	0	1	1	1	1	1	1	1	1	1	1	1	1	1	1	1	1
BC023587.2	IOH27906	REST corepressor 2 (RCOR2)	1838.48	0.614035	35	0	0	0	0	1	0	1	0	0	1	0	0	0	0	1	0	0	1	0	0	0	1	0	1	1	1	1	1	1	1	1	1	0	1	1	1	1	0	0	1	1	1	1	1
NM_005738.1	IOH5077	ADP-ribosylation factor-like 4A (ARL4A), transcript variant 1	1836.77	0.631579	36	0	0	0	0	1	1	1	0	0	1	0	0	1	1	1	0	0	1	1	0	0	1	0	1	0	1	1	0	1	1	1	1	0	0	0	0	1	0	1	1	1	1	1	1
BC013119.1	IOH10459	signal-induced proliferation-associated 1 like 2 (SIPA1L2)	1831.72	0.649123	37	0	0	1	0	1	1	0	0	1	0	1	0	1	1	1	0	0	1	0	0	0	1	0	1	0	1	1	0	1	1	1	1	1	0	1	1	1	0	1	1	1	1	1	1
NM_145043.1	IOH13260	nei like 2 (E. coli) (NEIL2)	1822	0.649123	37	0	0	0	0	1	1	1	0	0	1	0	0	1	1	1	0	0	1	0	0	0	0	0	1	1	1	1	0	1	1	1	1	1	1	1	1	1	0	1	1	1	1	1	1
BC041831.1	IOH27713	transducin-like enhancer of split 3 (E(sp1) homolog, Drosophila) (TLE3)	1820.22	0.614035	35	0	0	1	0	1	1	0	0	1	1	1	0	0	1	1	0	0	1	1	0	0	1	0	1	1	1	0	0	0	1	1	1	1	0	1	0	1	0	0	0	0	1	1	1
BC018137.1	IOH10369	TATA box binding protein (TBP)-associated factor, RNA polymerase I, B, 63kDa (TAF1B)	1819.09	0.649123	37	0	0	0	0	1	1	1	1	0	1	0	0	1	1	1	0	0	1	0	0	0	0	0	1	0	1	1	0	1	1	1	1	1	0	1	1	1	0	1	1	1	1	1	1
BC051716.1	IOH28817	RUN and FYVE domain containing 3 (RUFY3)	1816.53	0.684211	39	0	0	0	0	1	1	1	0	0	1	1	0	1	0	1	0	0	1	0	0	0	1	0	1	1	1	1	0	1	1	1	1	0	1	1	1	1	1	0	1	1	1	1	1
BC000914.1	IOH2971	splicing factor, arginine/serine-rich 3 (SFRS3)	1800.43	0.649123	37	0	0	0	0	1	1	1	0	0	1	1	0	0	1	1	0	0	1	1	0	0	1	0	1	1	1	1	0	1	1	1	1	0	1	1	1	1	0	1	1	1	1	1	1
BC020647.1	IOH12765	coiled-coil domain containing 59 (CCDC59)	1790.2	0.684211	39	0	0	0	0	1	1	1	0	0	1	0	0	1	0	1	0	0	1	1	0	0	1	0	1	1	1	1	0	1	1	1	1	0	1	1	1	1	1	1	1	1	1	1	1
NM_003516.2	IOH4867	histone cluster 2, H2aa3 (HIST2H2AA3)	1788.14	0.631579	36	0	0	0	0	1	1	1	0	0	1	0	0	1	1	1	0	0	1	0	0	0	0	0	1	1	1	0	0	1	1	0	1	1	1	1	1	1	0	1	1	1	1	1	1
NM_006298.2	IOH34757	zinc finger protein 192 (ZNF192)	1784.56	0.631579	36	0	0	1	0	1	1	1	0	1	1	0	0	1	1	1	0	0	1	0	0	0	1	0	1	1	1	1	0	0	1	0	1	1	0	1	0	1	1	1	1	1	1	1	1
BC012104.1	IOH13179	purinergic receptor P2Y, G-protein coupled, 2 (P2RY2)	1782.68	0.649123	37	0	0	0	0	1	1	1	0	0	1	1	0	1	1	1	0	0	1	0	0	0	1	0	1	0	1	0	0	1	1	0	1	1	1	1	1	1	1	1	1	1	1	1	1
NM_003527.4	IOH58710	Histone H2B type 1-O	1778.06	0.631579	36	0	0	0	0	1	1	1	0	0	1	0	0	1	1	1	0	0	1	0	0	0	0	0	0	1	1	1	0	1	1	0	1	1	0	1	1	1	0	1	1	1	1	1	1
BC009415.1	IOH14115	kinesin family member 26A (KIF26A)	1775.73	0.684211	39	0	0	0	0	1	1	1	1	1	0	0	0	1	1	1	0	0	1	0	0	0	1	0	1	0	1	1	0	0	1	1	1	1	0	1	1	1	1	1	1	1	1	1	1
NM_138285.3	IOH56483	Nucleoporin NUP53	1771.45	0.614035	35	0	0	1	0	1	1	0	0	1	1	1	0	0	1	0	0	0	1	0	0	0	1	0	1	1	1	1	0	0	1	1	1	0	1	0	1	1	1	1	0	1	1	1	1
NM_020137.3	IOH52884	GRIP1-associated protein 1	1770.94	0.631579	36	0	0	0	0	1	0	1	0	0	1	1	0	0	0	1	0	0	0	0	0	0	1	0	1	1	1	1	0	1	1	1	1	1	1	1	1	1	1	1	1	0	1	1	1
NM_014955.2	IOH45543	KIAA0859 (KIAA0859), transcript variant 2	1758.21	0.649123	37	0	0	0	0	1	1	1	0	0	0	0	0	1	1	1	0	0	1	0	0	0	1	0	1	0	1	1	0	1	1	1	1	1	1	1	1	1	0	1	1	1	1	1	1
NM_024979.2	IOH23111	Guanine nucleotide exchange factor DBS	1757.89	0.614035	35	0	0	0	0	1	0	1	0	0	1	0	0	0	1	1	0	0	1	1	0	0	1	0	0	1	1	0	0	1	1	1	1	0	1	1	0	1	1	1	1	0	1	1	1
XM_379430.1	IOH43976	PREDICTED: Homo sapiens hypothetical protein LOC285758 (LOC285758)	1755.34	0.614035	35	0	0	0	0	1	1	1	0	0	0	0	0	0	1	0	0	0	1	0	0	0	1	0	1	1	1	1	0	1	1	1	1	1	0	1	1	1	0	1	1	1	0	1	1
NM_021173.2	IOH45937	polymerase (DNA-directed), delta 4 (POLD4)	1753.98	0.631579	36	0	0	0	0	1	0	0	0	0	0	0	0	1	1	1	0	0	1	1	0	0	1	0	1	1	1	1	0	1	1	1	1	1	1	1	1	1	0	1	1	1	1	1	1
NM_145315.2	IOH39795	lactation elevated 1 (LACE1)	1750.05	0.631579	36	0	0	0	0	1	1	1	0	0	1	0	1	0	1	1	0	0	1	0	0	0	0	0	1	1	1	1	0	1	1	0	1	0	0	1	1	1	0	1	1	1	1	1	1
NM_020168.3	IOH20961	p21(CDKN1A)-activated kinase 6 (PAK6)	1733.25	0.631579	36	0	0	0	0	1	1	1	0	0	1	0	0	0	0	0	0	0	1	0	0	0	1	0	1	1	1	1	0	1	1	1	1	0	1	1	1	1	0	1	1	1	1	1	1
NM_012144.2	IOH55631	Dynein intermediate chain 1, axonemal	1730.58	0.666667	38	0	0	0	0	1	1	1	1	0	0	1	0	0	1	1	0	0	1	0	0	0	0	0	1	1	1	1	1	1	1	1	1	1	0	1	1	1	0	1	1	1	1	1	0
NM_001721.2		BMX non-receptor tyrosine kinase (BMX), transcript variant 2	1720.96	0.614035	35	0	0	0	0	1	1	0	0	0	0	1	0	1	1	1	0	0	1	1	0	0	0	0	0	1	1	1	0	1	1	1	1	1	0	1	1	1	0	1	1	1	1	1	0
NM_003978.2	IOH3303	proline-serine-threonine phosphatase interacting protein 1 (PSTPIP1)	1702.59	0.614035	35	0	0	0	0	1	1	1	0	0	1	1	0	0	0	1	0	0	1	0	0	0	0	0	0	1	1	1	0	1	1	1	1	1	1	1	1	1	0	1	1	1	1	1	1
NM_006217.2	IOH11838	serpin peptidase inhibitor, clade I (pancpin), member 2 (SERPINI2)	1699.58	0.614035	35	0	0	0	0	1	1	1	0	0	1	0	0	0	0	1	0	0	1	1	0	0	1	0	1	1	1	0	0	1	1	1	1	1	1	1	0	1	0	1	1	0	1	1	0
NM_018025.2	IOH6539	G patch domain containing 1 (GPATCH1)	1689.87	0.614035	35	0	0	0	0	1	0	0	0	0	1	0	0	1	0	1	0	0	1	0	0	0	0	0	0	1	1	1	0	1	1	1	1	1	1	1	1	1	0	1	1	1	1	1	1
NM_023930.1	IOH3701	potassium channel tetramerisation domain containing 14 (KCTD14)	1677.61	0.614035	35	0	0	0	0	1	1	1	0	0	1	0	0	0	1	1	0	0	1	0	0	0	1	0	1	1	1	0	0	1	1	0	1	1	0	1	0	1	0	1	1	1	1	1	1
BC001553.1	IOH10899	chromatin modifying protein 2B (CHMP2B)	1676.8	0.614035	35	0	0	0	0	1	1	0	0	0	1	0	0	1	1	1	0	0	1	0	0	0	0	0	0	1	1	1	0	1	1	1	1	1	1	0	1	0	1	1	1	1	1	1	1
NM_019069.3	IOH26403	WD repeat domain 5B (WDR5B)	1666.75	0.631579	36	0	0	0	0	1	1	1	0	0	1	0	0	1	1	1	0	0	1	1	0	0	1	0	1	0	1	1	0	1	1	1	1	0	0	0	0	1	0	1	1	1	1	1	1
BC010537.1	IOH10170	SUB1 homolog (S. cerevisiae) (SUB1)	1663.72	0.614035	35	0	0	0	0	0	1	0	0	0	1	0	0	1	1	1	0	0	1	0	0	0	0	0	1	1	1	0	0	1	1	1	1	1	1	1	1	1	0	1	1	1	1	0	1
BC005889.2	IOH5867	pelota homolog (Drosophila) (PELO)	1661.7	0.631579	36	0	0	0	0	1	1	0	0	0	1	1	0	1	1	1	0	0	1	0	0	0	1	0	0	1	1	1	0	1	1	1	1	1	1	0	1	0	1	1	1	1	1	1	1
NM_016062.1	IOH4424	family with sequence similarity 96, member B (FAM96B)	1656.77	0.614035	35	0	0	0	0	1	1	1	0	0	0	0	0	1	1	1	0	0	1	1	0	0	1	0	1	1	1	1	0	1	1	1	1	0	1	1	0	1	0	1	1	1	0	1	1
NM_005678.3	IOH45840	SNRPN upstream reading frame (SNURF), transcript variant 1	1655.53	0.614035	35	0	0	0	0	1	1	1	1	0	0	0	0	1	1	1	0	0	1	0	0	0	1	0	1	1	1	1	0	1	1	0	1	0	0	1	1	1	0	1	1	1	1	1	1
NM_003137.2		SFRS protein kinase 1 (SRPK1)	1654.89	0.614035	35	0	0	0	0	1	1	1	0	0	1	1	0	1	0	1	0	0	0	0	0	0	1	0	1	1	1	1	0	0	1	1	1	1	1	1	0	1	1	1	1	1	0	0	1
NM_032417.2	IOH57369	Sperm protein associated with the nucleus on the X chromosome D	1636.57	0.666667	38	0	0	0	0	1	1	1	0	0	1	0	0	1	1	1	0	0	1	0	0	0	1	0	1	1	1	0	0	1	1	1	1	0	1	1	1	1	1	1	1	1	1	1	1
BC053667.1	IOH29009	lectin, galactoside-binding, soluble, 3 (LGALS3)	1600.22	0.631579	36	0	0	0	0	1	1	1	1	0	1	1	0	0	1	0	0	0	1	1	0	0	1	0	0	1	1	1	0	0	1	1	1	1	0	1	1	1	0	1	1	1	1	1	1
BC032645.1	IOH21959	chromosome 10 open reading frame 88 (C10orf88)	1599.8	0.631579	36	0	0	0	0	1	1	1	1	0	0	0	0	1	0	1	0	0	1	0	0	0	1	0	0	0	1	1	0	1	1	1	1	1	1	1	1	1	0	1	1	1	1	1	1
NM_005034.2	IOH10479	polymerase (RNA) II (DNA directed) polypeptide K, 7.0kDa (POLR2K)	1585.56	0.631579	36	0	0	0	0	1	1	1	0	0	1	0	0	0	1	0	0	0	1	0	0	0	1	0	1	1	1	1	0	1	1	1	1	1	0	1	1	1	1	1	1	1	1	1	1
NM_003160.1		Serine/threonine-protein kinase 13	1578.85	0.631579	36	0	0	0	0	1	1	1	0	0	0	1	0	1	1	1	0	0	1	1	0	0	1	0	1	1	1	1	0	1	1	1	1	0	1	1	0	1	0	0	1	1	0	1	1
NM_003524.2	IOH58715	Histone H2B type 1-H	1569.44	0.631579	36	0	0	1	0	1	1	1	0	0	0	0	0	1	1	1	0	0	1	0	0	0	0	0	1	1	1	0	0	1	1	0	1	1	0	1	1	1	0	1	1	1	1	1	1
NM_139124.1	IOH57251	C-jun-amino-terminal kinase-interacting protein 2	1565.07	0.614035	35	0	0	0	0	1	1	1	0	0	0	0	0	1	0	1	0	0	1	0	0	0	0	0	1	1	1	1	0	1	1	1	1	1	0	1	1	1	0	1	1	1	1	1	1
NM_003512.3	IOH14485	Histone H2A type 1-C	1564.12	0.614035	35	0	0	0	0	1	1	0	0	0	1	0	0	1	0	1	0	0	1	0	0	0	0	0	1	1	1	1	0	1	1	1	1	1	1	0	1	1	0	1	1	1	1	1	1
BC011526.1	IOH9712	PCTAIRE protein kinase 3 (PCTK3)	1550.79	0.614035	35	0	0	0	0	1	0	0	0	0	1	0	0	1	0	1	0	0	0	0	0	0	0	0	1	1	1	1	0	1	1	1	1	1	0	1	1	1	1	1	1	1	1	1	1
BC024004.1	IOH11309	Rap guanine nucleotide exchange factor (GEF) 4 (RAPGEF4)	1537.83	0.614035	35	0	0	0	0	1	1	0	0	0	1	1	0	1	0	1	0	0	1	0	0	0	0	0	0	1	1	1	0	1	1	1	1	1	1	0	1	1	1	1	1	1	1	1	1
NM_080911.1	IOH43486	uracil-DNA glycosylase (UNG), transcript variant 2	1515.81	0.649123	37	0	0	0	0	1	1	1	0	0	1	0	0	1	1	1	0	0	1	0	0	0	0	0	0	1	1	1	0	1	1	1	1	1	1	1	1	0	1	1	1	1	1	1	1
NM_004060.2	IOH4393	cyclin G1 (CCNG1), transcript variant 1	1505.51	0.631579	36	0	0	0	0	1	1	0	0	0	1	0	0	1	0	1	0	0	1	0	0	0	1	0	1	1	1	1	0	1	1	1	1	1	1	0	1	1	0	1	1	1	1	1	1
NM_032345.1	IOH6625	within bgcn homolog (Drosophila) (WIBG)	1504.06	0.649123	37	0	0	0	0	1	1	1	0	0	1	0	0	1	0	1	0	0	1	1	0	0	1	0	1	1	1	1	0	1	1	1	1	0	1	1	0	1	0	1	1	1	1	1	1
NM_004092.2	IOH54943	Enoyl-CoA hydratase, mitochondrial	1503.2	0.614035	35	0	0	0	0	0	1	1	0	0	0	0	0	1	1	1	0	0	1	1	0	0	1	0	1	1	1	1	0	1	1	1	1	1	0	1	0	1	0	1	0	1	1	1	1
BC013352.1	IOH14736	HpaII tiny fragments locus 9c protein	1445.27	0.614035	35	0	0	0	0	1	1	1	1	0	1	0	0	1	1	1	0	0	1	1	0	0	1	0	1	0	1	1	0	1	1	0	1	1	0	0	1	1	0	1	1	1	1	1	1
NM_004226.1		Serine/threonine-protein kinase 17B	1410.36	0.631579	36	0	0	0	0	1	1	1	0	0	1	1	0	1	1	1	0	0	1	0	0	0	1	0	0	1	1	1	0	0	1	1	1	1	1	0	1	1	1	1	1	1	0	1	1
BC047870.1	IOH26949	src kinase associated phosphoprotein 1 (SKAP1)	1406.53	0.614035	35	0	0	0	0	1	0	0	0	0	1	1	0	1	1	0	0	0	1	0	0	0	0	0	0	1	1	1	0	1	1	1	1	1	1	1	1	1	0	1	1	1	1	1	1
BC063681.1	IOH61524	Melanoma-associated antigen 2	1371.79	0.631579	36	0	0	0	0	1	1	1	0	0	0	0	0	1	1	1	0	0	1	0	0	0	1	0	1	1	1	1	0	0	1	1	1	0	0	1	1	1	0	1	1	1	1	1	1
NM_145014.1	IOH59272	Hydrolethalus syndrome protein 1	1368.39	0.649123	37	0	0	1	0	1	0	1	0	0	0	0	0	1	0	1	0	0	1	0	0	0	1	0	1	1	1	1	0	1	1	1	1	0	1	1	1	1	1	1	1	1	1	1	1
NM_024046.1		CaM kinase-like vesicle-associated (CAMKV)	1349.03	0.614035	35	0	0	0	0	1	0	1	0	0	0	0	0	1	0	1	0	0	1	0	0	0	0	0	0	1	1	1	0	1	1	1	1	1	1	1	1	1	0	1	1	1	1	1	1
BC032382.1	IOH21661	similar to pleckstrin homology domain containing, family M (with RUN domain) member 1; adapter protein 162, mRNA, complete cds.	1287.71	0.614035	35	0	0	0	0	1	0	1	0	0	1	1	0	1	0	1	0	0	1	0	0	0	1	0	1	1	1	0	0	0	1	1	1	0	1	1	1	1	1	0	1	1	1	1	1
NM_001008234.1	IOH58628	hypothetical gene supported by BC036588, mRNA (cDNA clone MGC:42159 IMAGE:4799429), complete cds.	1266.23	0.631579	36	0	0	0	0	1	1	1	0	0	1	0	0	1	0	1	0	0	1	0	0	0	1	0	1	1	1	1	0	1	1	1	1	0	1	1	0	1	0	1	1	1	1	1	1
BC022231.1	IOH10619	Ets2 repressor factor (ERF)	1262.92	0.614035	35	0	0	0	0	1	1	1	0	0	1	0	0	0	0	1	0	0	1	0	0	0	1	0	1	1	1	1	0	1	1	1	1	0	1	1	0	1	0	1	1	1	1	1	1
BC055427.1	IOH28811	TRAF2 and NCK interacting kinase (TNIK)	1161.93	0.649123	37	0	0	0	0	1	1	1	0	0	0	1	0	0	0	1	0	0	1	0	0	0	1	0	1	1	1	1	0	1	1	1	1	0	1	1	1	1	1	1	1	1	1	1	1
[truncated: 355 more columns]

## Sheet: Supplemental Table 1B
Database ID	Ultimate ORF ID	Description	Average RFU	Percent Positive	Total hits	File1 Hit	File2 Hit	File3 Hit	File4 Hit	File5 Hit	File6 Hit	File7 Hit	File8 Hit	File9 Hit	File10 Hit	File11 Hit	File12 Hit	File13 Hit	File14 Hit	File15 Hit	File16 Hit	File17 Hit	File18 Hit	File19 Hit	File20 Hit	File21 Hit	File22 Hit	File23 Hit	File24 Hit	File25 Hit	File26 Hit	File27 Hit	File28 Hit	File29 Hit	File30 Hit	File31 Hit	File32 Hit	File33 Hit	File34 Hit	File35 Hit	File36 Hit	File37 Hit	File38 Hit	File39 Hit	File40 Hit	File41 Hit	File42 Hit	File43 Hit	File44 Hit
NM_003141.2	IOH9948	tripartite motif-containing 21 (TRIM21)	62802.4	0.982456	56	1	1	1	1	1	1	1	1	1	1	1	1	1	1	1	1	1	1	1	1	1	1	0	1	1	1	1	1	1	1	1	1	1	1	1	1	1	1	1	1	1	1	1	1
BC030984.1	IOH23182	cDNA clone MGC:32654 IMAGE:4701898, complete cds	58491.9	0.982456	56	1	1	1	1	1	1	1	1	1	1	1	1	1	1	1	1	1	1	1	1	1	1	0	1	1	1	1	1	1	1	1	1	1	1	1	1	1	1	1	1	1	1	1	1
BC015833.1	IOH14840	cDNA clone MGC:27152 IMAGE:4691630, complete cds	57276.5	0.982456	56	1	1	1	1	1	1	1	1	1	1	1	1	1	1	1	1	1	1	1	1	1	1	0	1	1	1	1	1	1	1	1	1	1	1	1	1	1	1	1	1	1	1	1	1
PHR5001		Recombinant human CTLA-4/Fc	55636.4	0.982456	56	1	1	1	1	1	1	1	1	1	1	1	1	1	1	1	1	1	1	1	1	1	1	0	1	1	1	1	1	1	1	1	1	1	1	1	1	1	1	1	1	1	1	1	1
BC020233.1	IOH14752	cDNA clone MGC:31936 IMAGE:4765518, complete cds	54365.2	0.982456	56	1	1	1	1	1	1	1	1	1	1	1	1	1	1	1	1	1	1	1	1	1	1	0	1	1	1	1	1	1	1	1	1	1	1	1	1	1	1	1	1	1	1	1	1
BC016380.1	IOH23077	cDNA clone MGC:27376 IMAGE:4688477, complete cds	46863.7	0.982456	56	1	1	1	1	1	1	1	1	1	1	1	1	1	1	1	1	1	1	1	1	1	1	0	1	1	1	1	1	1	1	1	1	1	1	1	1	1	1	1	1	1	1	1	1
BC030813.1	IOH23055	cDNA clone MGC:22645 IMAGE:4700961, complete cds	44904.1	0.964912	55	1	1	1	1	1	1	1	1	1	1	1	1	1	1	1	1	1	1	1	1	1	1	0	1	1	1	1	1	1	1	1	1	1	1	1	1	1	1	1	1	1	1	1	1
NM_014481.2	IOH4887	APEX nuclease (apurinic/apyrimidinic endonuclease) 2 (APEX2), nuclear gene encoding mitochondrial protein	40442.3	0.947368	54	1	1	1	1	1	1	1	1	1	1	1	1	1	1	1	1	1	1	1	1	0	1	0	1	1	1	1	1	1	1	1	1	1	1	1	1	1	1	1	1	1	1	1	1
BC022362.1	IOH14191	cDNA clone MGC:23888 IMAGE:4704496, complete cds	30665.8	0.982456	56	1	1	1	1	1	1	1	1	1	1	1	1	1	1	1	1	1	1	1	1	1	1	0	1	1	1	1	1	1	1	1	1	1	1	1	1	1	1	1	1	1	1	1	1
NM_203284.1	IOH39978	recombination signal binding protein for immunoglobulin kappa J region (RBPJ), transcript variant 4	29880.2	0.964912	55	1	1	1	1	1	1	1	1	1	1	1	1	1	1	1	1	1	1	1	1	0	1	0	1	1	1	1	1	1	1	1	1	1	1	1	1	1	1	1	1	1	1	1	1
NM_024692.3	IOH42634	CAP-GLY domain containing linker protein family, member 4 (CLIP4)	26846.1	0.947368	54	1	1	1	1	1	1	1	1	1	1	1	1	1	1	1	1	1	1	1	0	0	1	0	1	1	1	1	1	1	1	1	1	1	1	1	1	1	1	1	1	1	1	1	1
BC018929.1	IOH22929	pleckstrin homology-like domain, family A, member 1 (PHLDA1)	21412.2	0.912281	52	0	1	1	1	1	1	1	1	1	1	1	1	1	1	1	1	0	1	1	1	0	1	0	1	1	1	1	1	1	1	1	1	1	1	0	1	1	1	1	1	1	1	1	1
BC032451.1	IOH21663	cDNA clone MGC:40426 IMAGE:5178085, complete cds	21277.8	0.964912	55	1	1	1	1	1	1	1	1	1	1	1	1	1	1	1	1	1	1	1	1	0	1	0	1	1	1	1	1	1	1	1	1	1	1	1	1	1	1	1	1	1	1	1	1
BC099907.1	IOH62625	General transcription factor II-I	18984.8	0.912281	52	1	0	1	1	1	1	1	1	1	1	1	1	1	1	1	1	0	1	1	0	0	1	0	1	1	1	1	1	1	1	1	1	1	1	1	1	1	1	1	1	1	1	1	1
NM_004987.3	IOH55033	LIM and senescent cell antigen-like-containing domain protein 1	18632.6	0.912281	52	1	1	1	1	1	1	1	1	1	1	1	1	1	1	1	1	0	1	1	0	0	1	0	1	1	1	1	1	1	1	1	1	1	1	0	1	1	1	1	1	1	1	1	1
BC031650.1	IOH22742	Putative E3 ubiquitin-protein ligase SH3RF2	17013.7	0.947368	54	1	1	1	1	1	1	1	1	1	1	1	1	1	1	1	1	0	1	1	1	0	1	0	1	1	1	1	1	1	1	1	1	1	1	1	1	1	1	1	1	1	1	1	1
BC014991.1	IOH12177	N-methylpurine-DNA glycosylase (MPG)	16755.4	0.929825	53	1	1	1	1	1	1	1	1	1	1	1	1	1	1	1	1	0	1	1	0	0	1	0	1	1	1	1	1	1	1	1	1	1	1	1	1	1	1	1	1	1	1	1	1
NM_012325.1	IOH41294	microtubule-associated protein, RP/EB family, member 1 (MAPRE1)	16440	0.859649	49	0	0	1	0	1	1	1	1	1	1	1	0	1	1	1	1	0	1	1	0	1	1	0	0	1	1	1	1	1	1	1	1	1	1	1	1	1	1	1	1	1	1	1	1
NM_002945.2	IOH11757	replication protein A1, 70kDa (RPA1)	15273.5	0.824561	47	0	1	1	0	1	1	1	0	1	1	1	0	1	1	1	1	0	0	1	0	0	1	0	1	1	1	1	1	1	1	1	1	1	1	1	1	1	1	1	1	1	1	1	1
BC025700.1	IOH11281	AF4/FMR2 family, member 4 (AFF4)	14887.5	0.877193	50	0	1	1	1	1	1	1	1	1	1	1	0	1	1	1	1	0	1	1	0	0	1	0	1	1	1	1	1	1	1	1	1	1	1	1	1	1	1	1	1	1	1	1	0
BC026346.1	IOH10816	family with sequence similarity 84, member A (FAM84A)	14879.9	0.894737	51	0	1	0	1	1	1	1	1	0	1	1	1	1	1	1	1	0	1	1	1	0	1	0	1	1	1	1	1	1	1	1	1	1	1	1	1	1	1	1	1	1	1	1	1
NM_032855.1	IOH14623	hematopoietic SH2 domain containing (HSH2D)	14574.3	0.964912	55	1	1	1	1	1	1	1	1	1	1	1	1	1	1	1	1	1	1	1	1	0	1	0	1	1	1	1	1	1	1	1	1	1	1	1	1	1	1	1	1	1	1	1	1
BC047536.1	IOH27737	sciellin (SCEL)	13552.1	0.929825	53	0	1	1	1	1	1	1	1	1	1	1	1	1	1	1	1	0	1	1	1	0	1	0	1	1	1	1	1	1	1	1	1	1	1	1	1	1	1	1	1	1	1	1	1
NM_138565.1	IOH6227	cortactin (CTTN), transcript variant 2	13369.5	0.859649	49	0	0	1	1	1	1	1	1	1	0	1	0	1	1	1	1	0	1	1	0	0	1	0	1	1	1	1	1	1	1	1	1	1	1	1	1	1	1	1	1	1	1	1	1
NM_003975.1	IOH13203	SH2 domain protein 2A (SH2D2A)	12018.7	0.894737	51	0	0	1	1	1	1	1	1	1	1	1	1	1	1	1	1	0	1	1	0	0	1	0	1	1	1	1	1	1	1	1	1	1	1	1	1	1	1	1	1	1	1	1	1
BC016330.1	IOH14709	RAD51 associated protein 1 (RAD51AP1)	11897.1	0.859649	49	0	0	1	1	1	1	1	1	1	1	1	0	1	1	1	1	0	1	1	0	0	1	0	1	1	1	1	1	1	1	1	1	1	1	1	1	1	1	1	1	1	1	1	1
NM_032349.1	IOH6316	nudix (nucleoside diphosphate linked moiety X)-type motif 16-like 1 (NUDT16L1)	11693.3	0.859649	49	0	0	1	0	1	1	1	1	1	1	1	0	1	1	1	1	0	1	1	0	0	1	0	1	1	1	1	1	1	1	1	1	1	1	1	1	1	1	1	1	1	1	1	1
BC001419.1	IOH4071	mitochondrial trans-2-enoyl-CoA reductase (MECR)	11484	0.842105	48	0	0	1	0	1	1	1	1	1	1	1	0	1	1	1	1	0	1	1	0	0	1	0	1	1	1	1	1	1	1	1	1	1	1	1	1	1	0	1	1	1	1	1	1
NM_006790.1	IOH7249	myotilin (MYOT)	11473.9	0.877193	50	0	1	1	0	1	1	1	1	1	1	1	0	1	1	1	1	0	1	1	0	0	1	0	1	1	1	1	1	1	1	1	1	1	1	1	1	1	1	1	1	1	1	1	1
NM_002822.3	IOH40883	twinfilin, actin-binding protein, homolog 1 (Drosophila) (TWF1)	11438.1	0.894737	51	1	0	1	1	1	1	1	1	1	1	1	0	1	1	1	1	1	1	1	0	0	1	0	1	1	1	1	1	1	1	1	1	1	1	1	1	1	1	1	1	1	1	1	1
BC002448.2	IOH4300	actin binding LIM protein 1 (ABLIM1)	11328.5	0.859649	49	0	0	1	1	1	1	1	1	1	1	1	0	0	1	1	1	0	1	1	0	0	1	0	1	1	1	1	1	1	1	1	1	1	1	1	1	1	1	1	1	1	1	1	1
BC053656.1	IOH28981	EGF-like repeats and discoidin I-like domains 3 (EDIL3)	10655.8	0.912281	52	0	1	1	1	1	1	1	1	1	1	1	1	1	1	1	1	0	1	1	0	0	1	0	1	1	1	1	1	1	1	1	1	1	1	1	1	1	1	1	1	1	1	1	1
NM_002714.2	IOH39632	protein phosphatase 1, regulatory (inhibitor) subunit 10 (PPP1R10)	10562.6	0.789474	45	0	0	1	1	1	1	1	1	1	1	1	0	1	1	0	0	0	1	0	0	0	1	0	1	1	1	1	1	1	1	1	1	1	1	0	1	1	1	1	0	1	1	1	1
BC104469.1	IOH63631	Outer dense fiber protein 3-like protein 2	10549.8	0.894737	51	1	0	1	1	1	1	1	1	1	1	1	0	1	1	1	1	0	1	1	0	0	1	0	1	1	1	1	1	1	1	1	1	1	1	1	1	1	1	1	1	1	1	1	1
BC000468.1	IOH3618	ubiquitin-conjugating enzyme E2 variant 1 (UBE2V1)	10529.6	0.877193	50	0	1	1	1	1	1	1	1	1	1	1	0	1	1	1	1	0	1	1	0	0	1	0	1	1	1	1	1	1	1	1	1	1	1	1	1	1	1	1	1	1	1	1	1
NM_145010.1	IOH10871	chromosome 10 open reading frame 63 (C10orf63)	10270.6	0.859649	49	0	0	1	1	1	1	1	1	1	1	1	0	1	1	1	1	1	1	1	0	1	1	0	1	1	1	1	1	0	1	1	1	0	1	1	1	1	1	1	1	1	1	1	1
BC022098.1	IOH14790	cDNA clone MGC:31944 IMAGE:4878869, complete cds	10185.2	0.894737	51	0	1	1	1	1	1	0	1	1	1	1	1	1	1	1	1	0	1	1	0	0	1	0	1	1	1	1	1	1	1	1	1	1	1	1	1	1	1	1	1	1	1	1	1
NM_017772.2	IOH42187	TBC1 domain family member 22B	10125.5	0.859649	49	0	0	1	0	1	1	1	1	1	1	1	0	1	1	1	1	0	1	1	1	0	1	0	0	1	1	1	1	1	1	1	1	1	1	1	1	1	1	1	1	1	1	1	1
BC104468.1	IOH63630	Outer dense fiber protein 3-like protein 2	9855.04	0.789474	45	1	0	1	1	1	1	1	0	1	1	1	0	1	1	1	1	0	1	1	0	0	1	0	1	1	1	1	0	1	0	1	1	0	1	1	1	1	1	0	1	1	1	1	1
BC034488.2	IOH22312	ATP-binding cassette, sub-family F (GCN20), member 1 (ABCF1)	9706.04	0.824561	47	0	0	1	1	1	1	1	1	1	1	0	1	1	1	1	1	0	1	1	0	0	0	0	1	1	1	1	1	1	1	1	1	0	0	1	1	1	1	1	1	1	1	1	1
NM_005522.3	IOH21992	homeobox A1 (HOXA1), transcript variant 1	9641.58	0.77193	44	0	0	0	0	0	1	1	1	1	1	1	0	1	1	1	0	0	1	1	0	0	0	0	1	1	1	1	1	1	1	1	0	1	1	1	1	1	1	1	1	1	1	1	1
BC017865.1	IOH13793	Fc fragment of IgG, low affinity IIIa, receptor (CD16a) (FCGR3A)	9462.43	0.859649	49	0	0	1	0	1	1	1	1	1	1	1	1	0	1	1	1	0	1	1	0	0	1	0	1	1	1	1	1	1	1	1	1	1	1	1	1	1	1	1	1	1	1	1	1
NM_133265.2	IOH38152	angiomotin (AMOT)	9037.75	0.859649	49	0	0	1	0	1	1	1	1	1	1	1	0	1	1	1	1	0	1	1	0	0	1	0	1	1	1	1	1	1	1	1	1	1	1	1	1	1	1	1	1	1	1	1	1
NM_001321.1	IOH1779	cysteine and glycine-rich protein 2 (CSRP2)	8893.37	0.842105	48	0	0	1	0	1	1	1	1	1	1	1	0	1	1	1	1	0	1	1	0	0	1	0	1	1	1	1	1	1	1	1	1	1	1	1	0	1	1	1	1	1	1	1	1
NM_005663.2	IOH46152	Wolf-Hirschhorn syndrome candidate 2 (WHSC2)	8867.95	0.894737	51	0	1	1	1	1	1	1	1	1	1	1	1	1	1	1	1	0	1	1	0	0	1	0	1	1	1	1	1	1	1	1	1	0	1	1	1	1	1	1	1	1	1	1	1
NM_152434.1	IOH42646	CWF19-like 2, cell cycle control (S. pombe) (CWF19L2)	8733.42	0.824561	47	0	0	1	0	1	1	1	1	1	1	1	0	1	1	1	1	0	1	1	0	0	1	0	1	1	1	1	0	1	1	1	1	1	1	1	1	1	1	1	1	1	1	1	1
NM_002625.1	IOH29862	6-phosphofructo-2-kinase/fructose-2,6-biphosphatase 1	8673.5	0.736842	42	0	1	0	0	0	0	1	1	0	1	0	0	1	1	1	1	1	1	1	0	0	1	0	1	1	1	1	0	1	0	1	1	0	1	1	1	1	1	1	1	1	1	1	0
BC092474.1	IOH62679	Proline-rich protein 16	8652.44	0.877193	50	0	0	1	1	1	1	1	1	1	1	1	0	1	1	1	1	0	1	1	0	0	1	0	1	1	1	1	1	1	1	1	1	1	1	1	1	1	1	1	1	1	1	1	1
NM_003093.1	IOH41465	small nuclear ribonucleoprotein polypeptide C (SNRPC)	8507.04	0.789474	45	0	0	1	0	1	1	1	1	1	1	1	1	1	1	1	1	0	0	1	0	0	1	0	1	1	1	0	0	1	1	1	1	1	1	1	1	1	1	1	0	1	1	1	1
BC029382.1	IOH23139	Angiogenic factor with G patch and FHA domains 1	8344.47	0.842105	48	0	0	1	0	1	1	1	1	1	1	1	0	1	1	1	1	0	1	1	0	0	1	0	1	1	1	1	1	1	1	1	1	1	1	1	1	1	1	1	1	1	1	1	1
BC005043.1	IOH6656	hypothetical protein MGC31957 (MGC31957)	8271.82	0.859649	49	0	0	1	0	1	1	1	1	1	1	1	0	1	1	1	1	0	1	1	0	0	1	0	1	1	1	1	1	1	1	1	1	1	1	1	1	1	1	1	1	1	1	1	1
NM_012472.1	IOH26570	leucine rich repeat containing 6 (LRRC6)	8256.89	0.789474	45	0	1	1	0	1	1	0	1	1	1	1	0	1	1	1	0	0	1	1	0	0	1	0	1	1	1	1	1	1	1	1	1	0	1	1	1	1	0	1	1	1	1	1	1
BC002914.1	IOH5733	WAS/WASL-interacting protein family member 1	8147.29	0.859649	49	0	0	1	0	1	1	1	1	1	1	1	0	1	1	1	1	0	1	1	0	0	1	0	1	1	1	1	1	1	1	1	1	1	1	1	1	1	1	1	1	1	1	1	1
BC031691.2	IOH28682	SLAIN motif family, member 2 (SLAIN2)	8098.89	0.877193	50	0	0	1	1	1	1	1	1	1	1	1	0	1	1	1	1	0	1	1	0	0	1	0	1	1	1	1	1	1	1	1	1	1	1	1	1	1	1	1	1	1	1	1	1
NM_014925.2	IOH42727	R3H domain-containing protein 2	8066.86	0.754386	43	0	1	1	0	1	1	1	0	1	0	1	0	0	1	1	0	0	1	1	0	0	1	0	1	1	1	1	1	1	1	1	1	1	1	1	1	1	1	1	1	1	1	1	1
BC005332.1	IOH7177	cDNA clone MGC:12418 IMAGE:3934658, complete cds	8022.6	0.859649	49	0	0	1	0	1	1	1	1	1	1	1	0	1	1	1	1	0	1	1	0	0	1	0	1	1	1	1	1	1	1	1	1	1	1	1	1	1	1	1	1	1	1	1	1
NM_020317.2	IOH4823	chromosome 1 open reading frame 63 (C1orf63)	7931.16	0.894737	51	0	1	1	0	1	1	1	0	1	1	1	1	1	1	1	1	1	1	1	0	0	1	0	1	1	1	1	1	1	1	1	1	1	1	1	1	1	1	1	1	1	1	1	1
NM_015122.1	IOH26137	FCH domain only 1 (FCHO1)	7929.11	0.824561	47	0	0	1	0	1	1	1	1	1	1	1	1	1	1	1	0	0	1	1	0	0	1	0	1	1	1	1	1	1	1	1	1	0	1	1	1	1	1	1	1	1	1	1	1
NM_005884.2	IOH2475	p21(CDKN1A)-activated kinase 4 (PAK4), transcript variant 1	7921.42	0.842105	48	0	0	1	0	1	1	1	1	1	1	1	1	1	1	1	1	0	1	1	1	0	1	0	1	1	1	1	0	1	1	1	1	1	0	1	1	1	1	1	1	1	1	1	1
NM_201998.1	IOH56887	Splicing factor 1	7857.89	0.859649	49	0	0	1	1	1	1	1	1	1	1	1	0	1	1	1	1	0	1	1	0	0	1	0	1	1	1	1	1	1	1	1	1	1	1	1	1	1	1	0	1	1	1	1	1
NM_032017.1	IOH40615	serine/threonine kinase 40 (STK40)	7798.15	0.824561	47	0	0	0	0	1	1	1	1	0	1	1	0	1	1	1	1	0	1	1	0	0	1	0	1	1	1	1	1	1	1	1	1	1	1	1	1	1	1	1	1	1	1	1	1
NM_012289.2	IOH5732	Kelch-like ECH-associated protein 1	7694.18	0.807018	46	0	0	0	0	1	1	1	0	0	1	1	0	1	1	1	1	0	1	1	0	0	1	0	1	1	1	1	1	1	1	1	1	1	1	1	1	1	1	1	1	1	1	1	1
BC011454.1	IOH9647	angiomotin like 2 (AMOTL2)	7668.25	0.842105	48	0	1	1	0	1	1	1	1	1	1	1	0	1	1	1	1	0	1	1	0	0	1	0	1	1	1	1	1	1	1	1	1	1	1	1	1	1	1	1	1	1	1	1	1
NM_152243.1	IOH42102	Cdc42 effector protein 1	7514.95	0.859649	49	0	0	1	0	1	1	1	1	1	1	0	1	1	1	1	1	0	1	1	0	0	1	0	1	1	1	1	1	1	1	1	1	1	1	1	1	1	1	1	1	1	1	1	1
NM_152376.2	IOH26515	UBX domain containing 3 (UBXD3)	7417.15	0.719298	41	0	1	1	0	1	1	1	1	1	1	1	0	1	1	0	0	0	0	0	0	0	1	0	1	1	1	1	0	1	1	1	1	1	0	0	1	1	0	1	1	1	1	1	1
BC020555.1	IOH10305	SERPINE1 mRNA binding protein 1 (SERBP1)	7408.29	0.877193	50	0	0	1	1	1	1	1	1	1	1	1	1	1	1	1	1	0	1	1	0	0	1	0	1	1	1	1	1	1	1	1	1	1	1	1	1	1	0	1	1	1	1	1	1
NM_001312.2	IOH3437	cysteine-rich protein 2 (CRIP2)	7404.62	0.842105	48	0	0	1	0	1	1	1	1	1	1	0	0	1	1	1	1	0	1	1	0	0	1	0	1	1	1	1	1	1	1	1	1	1	1	1	1	1	1	1	1	1	1	1	1
NM_024316.1	IOH12150	leukocyte receptor cluster (LRC) member 1 (LENG1)	7393.61	0.859649	49	0	0	1	1	1	1	1	1	1	1	1	0	1	1	1	1	0	0	1	0	0	1	0	1	1	1	1	1	1	1	1	1	1	1	1	1	1	1	1	1	1	1	1	1
BC033308.1	IOH26796	DAZ interacting protein 1-like (DZIP1L)	7385.57	0.754386	43	0	0	1	0	1	1	1	0	1	1	1	0	1	1	1	1	0	1	1	0	0	0	0	1	0	1	1	1	1	1	1	1	0	0	1	1	1	0	1	1	1	1	1	1
NM_023938.4	IOH3759	Specifically androgen-regulated gene protein	7350.86	0.859649	49	0	0	1	1	1	1	1	1	1	1	1	0	1	1	0	1	0	1	1	0	0	1	0	1	1	1	1	1	1	1	1	1	1	1	1	1	1	1	1	1	1	1	1	1
NM_199190.1	IOH42760	La ribonucleoprotein domain family, member 4 (LARP4), transcript variant 3	7316.86	0.701754	40	0	0	1	0	1	1	1	1	1	1	0	1	1	0	1	0	0	1	1	0	0	1	0	1	1	0	1	0	1	1	1	1	1	1	0	1	0	0	1	1	1	1	0	0
NM_016848.2	IOH11138	SHC-transforming protein 3	7300.66	0.894737	51	0	0	1	1	1	1	1	1	1	1	1	0	1	1	1	1	0	1	1	0	1	1	0	1	1	1	1	1	1	1	1	1	1	1	1	1	1	1	1	1	1	1	1	1
NM_001032293.1	IOH3584	zinc finger protein 207 (ZNF207), transcript variant 2	7256.4	0.789474	45	0	0	1	0	1	1	1	1	0	1	1	0	1	1	1	0	0	1	1	0	0	1	0	1	1	1	1	1	1	1	1	1	0	1	1	1	1	1	1	1	1	1	1	1
NM_032141.1	IOH43707	coiled-coil domain containing 55 (CCDC55), transcript variant 1	7198.27	0.807018	46	0	0	1	1	1	1	1	1	1	1	1	0	1	1	1	1	0	1	1	0	0	1	0	1	1	1	1	1	1	1	1	1	1	1	1	1	1	0	1	1	1	0	1	1
NM_172159.2	IOH25842	potassium voltage-gated channel, shaker-related subfamily, beta member 1 (KCNAB1), transcript variant 3	7069.2	0.824561	47	0	0	1	0	1	1	1	1	0	1	1	0	1	1	1	1	0	1	1	0	0	1	0	1	0	1	1	1	1	1	1	1	1	1	1	1	1	1	1	1	1	1	1	1
NM_005898.4	IOH46168	cell cycle associated protein 1 (CAPRIN1), transcript variant 1	6997.26	0.789474	45	0	0	1	0	1	1	1	1	1	1	1	1	1	1	1	1	0	1	1	0	0	0	0	1	1	1	1	0	1	1	1	1	1	1	0	1	0	1	1	1	0	1	1	1
NM_005558.2	IOH13864	ladinin 1 (LAD1)	6873.46	0.859649	49	0	1	1	0	1	1	1	1	1	1	1	0	1	1	1	1	1	1	1	0	0	1	0	1	1	1	1	0	1	1	1	1	1	1	1	1	1	1	1	1	1	1	1	1
NM_024038.2	IOH5926	chromosome 19 open reading frame 43 (C19orf43)	6834.54	0.77193	44	0	0	1	1	1	1	0	1	1	1	1	0	1	1	1	1	0	1	1	0	0	1	0	1	1	1	1	1	1	1	1	1	1	1	1	1	1	0	1	1	1	1	1	1
NM_004527.2	IOH40231	mesenchyme homeobox 1 (MEOX1), transcript variant 1	6784.78	0.824561	47	0	0	0	0	1	1	1	1	0	1	1	0	1	1	1	1	0	1	1	0	0	1	0	1	1	1	1	1	1	1	1	1	1	1	1	1	1	1	1	1	1	1	1	1
NM_178552.2	IOH27375	chromosome 22 open reading frame 33 (C22orf33)	6747.63	0.824561	47	0	0	1	1	1	1	1	1	1	1	1	0	1	1	1	1	0	1	1	0	0	1	0	1	1	1	1	1	1	1	1	1	1	1	1	1	1	1	1	1	1	1	1	1
NM_012321.1	IOH3488	LSM4 homolog, U6 small nuclear RNA associated (S. cerevisiae) (LSM4)	6741.95	0.807018	46	0	0	1	0	1	1	1	0	1	1	1	0	1	1	1	1	0	1	1	0	0	1	0	1	1	1	1	0	1	1	1	1	1	0	1	1	1	1	1	1	1	1	1	1
PV4202		NIMA (never in mitosis gene a)-related kinase 1 (NEK1)	6677.68	0.859649	49	0	0	1	0	1	1	1	1	1	1	1	0	1	1	1	1	0	1	1	0	0	1	0	1	1	1	1	1	1	1	1	1	1	1	1	1	1	1	1	1	1	1	1	1
BC030592.2	IOH22341	HIV-1 Rev binding protein (HRB)	6657.08	0.649123	37	0	0	1	0	1	1	1	0	1	1	0	0	1	1	0	1	0	1	1	0	0	1	0	0	1	1	1	0	1	0	0	1	1	0	1	1	1	1	0	1	1	1	1	0
NM_006479.2	IOH7384	RAD51 associated protein 1 (RAD51AP1)	6627.68	0.842105	48	0	0	1	1	1	1	1	1	1	1	1	0	1	1	1	1	0	1	1	0	0	1	0	1	1	1	1	1	1	1	1	1	1	1	1	1	1	0	1	1	1	1	1	1
BC032852.2	IOH27153	melanoma antigen family B, 4 (MAGEB4)	6575.4	0.789474	45	0	0	0	0	1	1	1	1	0	1	1	1	1	1	1	0	0	1	1	0	0	1	0	1	1	1	1	1	1	1	1	1	1	0	1	1	1	1	1	1	1	1	1	1
NM_018553.1	IOH44546	Uncharacterized protein C17orf85	6562.64	0.754386	43	0	0	1	0	1	1	1	1	0	1	1	0	1	1	1	0	0	1	0	0	0	1	0	1	1	1	1	0	1	1	1	0	1	1	1	1	1	1	1	1	1	1	1	1
NM_172160.1	IOH35727	potassium voltage-gated channel, shaker-related subfamily, beta member 1 (KCNAB1), transcript variant 1	6510.58	0.824561	47	0	0	1	0	1	1	1	0	1	1	1	0	1	1	1	1	0	1	1	0	0	1	0	1	1	1	1	1	1	1	1	1	1	1	1	1	1	1	1	1	1	1	1	1
NM_032943.2	IOH38478	synaptotagmin-like 2 (SYTL2), transcript variant a	6475.75	0.736842	42	0	0	0	0	1	1	1	1	1	1	0	0	1	1	1	0	0	1	0	0	0	1	0	1	0	1	1	0	1	1	1	1	1	1	1	1	1	0	1	1	1	1	1	1
BC017202.2	IOH57138	Isovaleryl-CoA dehydrogenase, mitochondrial	6418.93	0.701754	40	0	0	0	0	0	1	0	0	0	0	0	0	1	1	1	0	0	1	1	0	0	1	0	0	1	1	1	1	1	1	1	1	1	1	1	1	1	1	1	1	1	1	1	1
NM_018441.2	IOH4050	peroxisomal trans-2-enoyl-CoA reductase (PECR)	6385.3	0.859649	49	0	0	1	0	1	1	1	1	1	1	1	0	1	1	1	1	0	1	1	0	0	1	0	1	1	1	1	1	1	1	1	1	1	1	1	1	1	1	1	1	1	1	1	1
BC042999.2	IOH25869	Putative Polycomb group protein ASXL2	6380.17	0.684211	39	0	0	1	0	0	0	1	1	1	1	1	0	1	1	1	1	0	0	1	0	0	1	0	1	0	1	1	0	1	1	1	1	1	0	1	0	1	1	1	0	1	1	1	1
BC012289.1	IOH11447	KIAA0515 (KIAA0515)	6330.89	0.789474	45	0	0	1	0	1	1	1	1	1	1	1	0	1	1	1	0	0	1	1	0	0	1	0	1	1	1	1	1	1	1	1	1	1	0	1	1	1	1	1	1	1	1	1	1
NM_014943.3	IOH28064	zinc fingers and homeoboxes 2 (ZHX2)	6138.69	0.789474	45	0	0	1	0	1	1	1	1	1	1	0	1	1	1	1	1	0	1	0	0	0	1	0	0	1	1	1	0	1	1	1	1	0	1	1	1	1	1	1	1	1	1	1	1
NM_004281.2	IOH6609	BCL2-associated athanogene 3 (BAG3)	6078.79	0.789474	45	1	0	1	0	1	1	1	0	1	1	1	0	1	1	1	0	0	1	0	0	0	1	0	1	1	1	1	1	1	1	1	1	1	1	1	1	1	1	1	1	1	1	1	1
BC002488.1	IOH3970	SERPINE1 mRNA binding protein 1 (SERBP1)	6017.85	0.807018	46	0	0	1	1	1	1	1	1	1	1	1	0	1	1	1	1	0	1	1	0	0	1	0	1	1	1	1	1	1	1	1	1	1	1	1	0	1	0	1	1	1	1	0	1
NM_144659.1	IOH21795	t-complex 10 (mouse)-like (TCP10L)	6011.04	0.842105	48	0	1	1	1	1	1	1	1	1	1	1	0	1	1	1	1	0	1	1	0	0	1	0	1	1	1	1	0	1	1	1	1	1	1	1	1	1	0	1	1	1	1	1	1
NM_198513.1	IOH11823	PHD finger protein 20-like 1 (PHF20L1), transcript variant 3	6005.23	0.807018	46	0	0	1	1	1	1	1	1	1	1	1	0	1	1	0	1	0	1	1	0	0	1	0	1	1	1	1	0	1	1	1	1	1	1	1	1	1	1	1	1	1	1	1	1
BC014020.1	IOH13375	BAI1-associated protein 2 (BAIAP2)	5918.09	0.859649	49	0	0	1	1	1	1	1	1	1	1	1	0	1	1	1	1	0	1	1	0	0	1	0	1	1	1	1	0	1	1	1	1	1	1	1	1	1	1	1	1	1	1	1	1
NM_007177.1	IOH10203	Protein FAM107A	5861.25	0.736842	42	0	0	0	0	1	1	1	1	0	1	0	0	1	1	1	1	0	1	0	0	0	1	0	1	1	1	1	0	1	1	1	1	1	0	1	1	1	1	1	1	1	1	1	1
BC064840.1	IOH40500	Histone deacetylase 7	5849.54	0.807018	46	0	0	1	1	1	1	1	1	1	1	0	0	1	1	1	0	0	1	1	0	0	1	0	1	1	1	1	1	1	1	1	1	1	1	1	1	1	0	1	1	1	1	1	1
NM_152377.1	IOH11555	chromosome 1 open reading frame 87 (C1orf87)	5836.25	0.842105	48	0	0	1	1	1	1	1	1	1	1	1	0	1	1	1	1	0	1	1	0	0	1	0	1	1	1	1	1	1	1	1	1	1	1	0	1	1	1	1	1	1	1	1	1
BC001304.1	IOH45994	piccolo (presynaptic cytomatrix protein) (PCLO)	5823.77	0.77193	44	0	0	1	1	1	1	1	1	1	1	1	0	1	1	1	1	1	1	1	0	0	1	0	1	0	1	1	0	1	1	1	1	1	0	1	1	1	0	1	1	1	1	1	1
NM_006640.2	IOH12164	septin 9 (SEPT9)	5796.08	0.631579	36	1	0	1	1	1	0	1	1	1	1	1	0	1	1	0	1	0	1	1	0	0	1	0	1	0	1	0	0	0	0	0	1	1	0	0	0	1	1	0	1	1	1	1	1
NM_006449.2	IOH12552	CDC42 effector protein (Rho GTPase binding) 3 (CDC42EP3)	5759.89	0.842105	48	0	0	1	1	1	1	1	1	1	1	1	1	1	1	1	0	0	1	0	0	0	1	0	1	1	1	1	1	1	1	1	1	1	1	1	1	1	1	1	1	1	1	1	1
BC072461.1	IOH62565	Cysteine and histidine-rich domain-containing protein 1	5754.46	0.789474	45	0	0	1	0	1	1	1	1	1	1	1	0	1	1	1	1	0	1	1	0	0	1	0	1	1	1	0	1	1	1	1	1	0	1	1	1	1	0	1	1	1	1	1	1
BC013437.1	IOH9908	myocyte enhancer factor 2A (MEF2A)	5725.96	0.736842	42	0	1	1	0	1	1	1	0	1	1	1	1	1	1	0	0	0	1	0	0	0	1	0	0	1	1	1	0	1	1	1	1	1	1	1	1	1	1	1	1	1	1	1	0
NM_006651.2	IOH4343	complexin 1 (CPLX1)	5669.07	0.666667	38	0	1	1	1	1	1	1	1	0	1	1	0	1	1	1	1	0	1	1	0	0	0	0	1	1	1	1	0	1	1	1	0	0	1	0	0	0	0	1	0	0	1	1	1
NM_003177.3	IOH4914	spleen tyrosine kinase (SYK)	5664.39	0.807018	46	0	0	1	0	1	1	1	0	1	0	1	0	1	1	1	0	0	1	1	0	0	1	0	1	1	1	1	1	1	1	1	1	1	1	1	1	1	1	1	1	1	1	1	1
NM_173060.1	IOH52621	Calpastatin	5661.27	0.719298	41	0	0	1	0	0	1	1	1	1	1	1	1	1	1	1	1	0	1	1	0	0	1	0	1	0	1	1	1	1	1	0	0	1	1	1	1	1	0	1	1	1	1	0	0
BC009894.2	IOH14557	3'-phosphoadenosine 5'-phosphosulfate synthase 2 (PAPSS2)	5618.42	0.842105	48	0	0	1	0	1	1	1	1	1	1	1	0	1	1	1	1	0	1	1	0	0	1	0	1	1	1	1	1	1	1	1	1	0	1	1	1	1	1	1	1	1	1	1	1
NM_016203.2	IOH42382	protein kinase, AMP-activated, gamma 2 non-catalytic subunit (PRKAG2), transcript variant a, mRNA.	5618.32	0.842105	48	0	0	1	0	1	1	1	1	1	0	1	0	1	1	1	1	0	1	1	0	0	1	0	1	1	1	1	1	1	1	1	1	1	1	1	1	1	1	1	1	1	1	1	1
NM_016520.1	IOH5899	chromosome 9 open reading frame 78 (C9orf78)	5522.57	0.754386	43	0	0	0	1	1	1	1	1	0	1	1	0	1	1	1	1	0	1	1	0	0	1	0	1	1	1	1	0	0	1	1	1	1	1	1	0	1	0	1	1	1	1	1	1
BC015665.2	IOH40642	LATS, large tumor suppressor, homolog 1 (Drosophila) (LATS1)	5522.56	0.824561	47	0	0	1	1	1	1	1	1	1	1	1	0	1	1	1	0	0	1	1	0	0	1	0	1	1	1	1	1	1	1	1	1	1	0	1	1	1	1	1	1	1	1	1	1
BC026039.1	IOH40656	mitochondrial GTPase 1 homolog (S. cerevisiae) (MTG1)	5511.68	0.789474	45	0	0	0	0	1	1	1	1	0	1	1	0	1	1	1	0	0	0	1	0	0	1	0	1	1	1	1	1	1	1	1	1	1	1	1	1	1	1	1	1	1	1	1	1
PV3359		Ephrin receptor A3 (EPHA3), transcript variant 1	5502.82	0.859649	49	0	0	1	1	1	1	1	1	1	1	1	0	1	1	1	0	0	1	1	0	0	1	0	1	1	1	1	1	1	1	1	1	1	1	1	1	1	1	1	1	1	1	1	1
BC048299.1	IOH26615	spermatogenesis associated, serine-rich 2 (SPATS2)	5476.93	0.807018	46	0	0	0	0	1	1	1	1	1	1	1	0	1	1	0	1	0	1	1	0	0	1	0	1	1	1	1	1	1	1	1	1	1	1	1	1	1	1	1	1	1	1	1	1
NM_004732.1	IOH29581	potassium voltage-gated channel, shaker-related subfamily, beta member 3 (KCNAB3)	5454.24	0.807018	46	0	0	1	0	1	1	1	1	0	1	1	0	1	1	1	0	0	1	1	0	0	1	0	1	1	1	1	1	1	1	1	1	1	1	1	1	1	0	1	1	1	1	1	1
NM_014763.2	IOH23003	mitochondrial ribosomal protein L19 (MRPL19), nuclear gene encoding mitochondrial protein	5431.92	0.859649	49	0	0	1	0	1	1	1	1	1	1	1	0	1	1	1	1	0	1	1	0	0	1	0	1	1	1	1	1	1	1	1	1	1	1	1	1	1	1	1	1	1	1	1	1
BC002733.2	IOH5365	chromosome 1 open reading frame 77 (C1orf77)	5427.77	0.824561	47	0	0	1	0	1	1	1	1	1	1	1	1	1	1	1	1	0	1	1	0	0	1	0	1	1	1	1	1	1	1	0	1	1	1	1	1	1	1	1	1	1	1	1	1
BC000442.1		Serine/threonine-protein kinase 12	5418.74	0.807018	46	0	0	1	0	1	1	1	0	0	1	1	0	1	1	0	1	0	1	1	0	0	1	0	1	1	1	1	1	1	1	1	1	1	1	1	1	1	1	1	1	1	1	1	1
BC015505.1	IOH9981	DEAD (Asp-Glu-Ala-Asp) box polypeptide 42 (DDX42)	5395	0.754386	43	0	0	1	0	1	1	1	1	1	1	1	0	1	1	1	0	0	1	1	0	0	1	0	1	1	1	1	0	1	1	1	1	1	0	1	1	0	1	1	1	1	0	1	1
BC009055.1	IOH3376	Protein FAM184A	5369.62	0.807018	46	0	0	1	1	1	1	1	1	1	1	0	0	1	1	1	1	0	1	1	0	0	1	0	1	0	1	1	1	1	1	1	1	1	1	1	1	1	0	1	1	1	1	1	1
NM_176791.2	IOH26363	family with sequence similarity 112, member A (FAM112A), transcript variant 1	5211.98	0.77193	44	0	0	1	0	1	1	1	1	1	1	1	0	1	1	1	1	0	1	1	0	0	1	0	1	1	1	0	0	1	1	0	1	1	1	1	1	1	1	1	1	0	1	1	1
NM_198467.1	IOH40427	round spermatid basic protein 1-like (RSBN1L)	5188.24	0.701754	40	0	0	1	0	1	1	1	0	1	0	0	0	1	1	1	0	0	1	0	0	0	1	0	1	1	1	1	0	1	1	1	1	1	0	1	1	1	0	1	1	1	1	1	1
BC042608.1	IOH27462	family with sequence similarity 90, member A1 (FAM90A1)	5185.68	0.842105	48	0	0	1	0	1	1	1	1	1	1	1	0	1	1	1	1	0	1	1	0	0	1	0	1	1	1	1	1	1	1	1	1	1	1	1	1	1	1	1	1	1	1	1	1
NM_003130.1	IOH13042	sorcin (SRI), transcript variant 1	5158.38	0.684211	39	0	1	1	0	1	1	1	1	1	1	1	0	1	1	1	1	0	1	1	0	0	1	0	1	1	1	0	0	1	0	0	1	1	1	1	1	1	0	1	1	1	1	1	0
BC080187.1	IOH62553	Leiomodin-1	5132.46	0.736842	42	0	0	1	0	1	1	1	1	1	1	0	0	1	1	1	0	0	1	1	0	0	1	0	1	1	1	0	0	1	1	1	1	1	1	1	1	1	1	1	1	1	1	1	1
BC098117.1	IOH63340	CaiB/baiF CoA-transferase family protein C7orf10	5091.15	0.649123	37	0	0	0	0	1	1	0	0	0	1	0	0	0	0	0	0	0	0	0	0	0	1	0	0	1	1	1	1	1	1	1	1	1	1	1	1	1	1	1	1	1	1	1	1
NM_199188.1	IOH38224	La ribonucleoprotein domain family, member 4 (LARP4), transcript variant 2	5090.91	0.789474	45	0	0	1	0	0	1	1	1	1	1	0	1	1	1	1	0	0	1	1	0	0	1	0	1	1	1	1	0	1	1	1	1	0	1	1	1	1	1	1	1	1	1	1	1
NM_001030002.1	IOH55430	Growth factor receptor-bound protein 7	5088.41	0.807018	46	0	0	1	0	1	1	1	1	0	1	1	0	1	1	1	0	0	1	1	0	0	1	0	1	1	1	1	1	1	1	1	1	1	1	1	1	1	1	1	1	1	1	1	1
BC001755.1	IOH4451	Leiomodin-1	5072.05	0.754386	43	0	0	1	0	1	1	1	1	1	1	1	0	1	1	1	0	0	1	1	0	0	1	0	1	1	1	0	1	1	1	1	1	1	1	1	0	1	1	1	0	1	1	0	1
BC026101.2	IOH10652	nudE nuclear distribution gene E homolog (A. nidulans)-like 1 (NDEL1)	5060.8	0.754386	43	0	0	0	0	1	1	1	1	0	1	0	0	1	1	1	1	0	1	1	0	0	1	0	1	1	1	0	0	1	1	1	1	1	0	1	1	1	1	1	1	1	1	1	1
BC012109.1	IOH12380	homer homolog 2 (Drosophila) (HOMER2)	5054.57	0.824561	47	0	0	1	0	1	1	1	1	0	1	1	0	1	1	1	1	0	1	1	0	0	1	0	1	1	1	1	0	1	1	1	1	1	1	1	1	1	1	1	1	1	1	1	1
NM_006591.1	IOH41599	polymerase (DNA-directed), delta 3, accessory subunit (POLD3)	5045.04	0.807018	46	0	0	1	1	1	1	1	1	1	1	0	0	1	1	1	0	0	1	1	0	0	1	0	1	1	1	1	0	1	1	1	1	1	1	1	1	1	1	1	1	1	1	1	1
NM_152763.2	IOH22315	chromosome 1 open reading frame 62 (C1orf62)	5039.41	0.824561	47	0	0	1	1	1	1	1	1	1	1	1	0	1	1	1	0	0	1	1	1	0	1	0	1	1	1	1	1	1	1	1	1	0	1	1	1	1	1	1	1	1	1	1	1
BC050645.1	IOH27032	bystin-like (BYSL)	4876.45	0.807018	46	0	0	0	1	0	1	1	1	0	1	0	1	1	1	1	1	0	1	1	0	0	1	0	1	1	1	1	1	1	1	1	1	1	1	1	1	1	1	1	1	1	1	1	1
BC014271.2	IOH13908	endoglin (Osler-Rendu-Weber syndrome 1) (ENG)	4873.07	0.842105	48	0	0	1	0	1	1	1	1	1	1	1	0	1	1	1	1	0	1	1	0	0	1	0	1	1	1	1	1	1	1	1	1	1	1	1	1	1	1	1	1	1	1	1	1
NM_080659.1	IOH7410	chromosome 11 open reading frame 52 (C11orf52)	4862.94	0.824561	47	0	0	1	0	1	1	1	1	0	1	1	0	1	1	1	1	0	1	1	0	0	1	0	1	1	1	1	1	1	1	1	1	1	0	1	1	1	1	1	1	1	1	1	1
NM_005030.2	IOH5070	polo-like kinase 1 (Drosophila) (PLK1)	4842.61	0.859649	49	0	0	1	0	1	1	1	1	1	1	1	0	1	1	1	1	0	1	1	0	0	1	0	1	1	1	1	1	1	1	1	1	1	1	1	1	1	1	1	1	1	1	1	1
BC067755.1	IOH40120	potassium channel tetramerisation domain containing 18 (KCTD18)	4831.52	0.824561	47	0	0	1	1	1	1	1	1	1	1	1	0	1	1	1	1	0	1	1	0	0	0	0	1	1	1	1	1	1	1	1	1	1	0	1	0	1	1	1	1	1	1	1	1
BC006318.1	IOH6433	erythrocyte membrane protein band 4.9 (dematin) (EPB49)	4830.34	0.807018	46	0	0	0	1	1	1	1	1	0	1	1	0	1	1	1	1	0	1	1	0	0	1	0	1	0	1	1	1	1	1	1	1	1	1	1	1	1	1	1	1	1	1	1	1
BC010852.1	IOH9927	Aflatoxin B1 aldehyde reductase member 2	4825.11	0.842105	48	0	0	1	0	1	1	1	1	1	1	1	0	1	1	1	1	0	1	1	0	0	1	0	1	1	1	1	1	1	1	1	1	1	1	1	1	1	1	1	1	1	1	1	1
NM_015640.1	IOH22934	SERPINE1 mRNA binding protein 1 (SERBP1), transcript variant 4	4821.37	0.701754	40	0	0	1	1	1	1	1	1	1	0	1	0	1	1	1	0	0	1	1	0	0	1	0	1	1	1	1	0	1	1	1	1	1	0	1	1	1	0	1	1	1	0	1	1
NM_016207.2	IOH14059	cleavage and polyadenylation specific factor 3, 73kDa (CPSF3)	4813.5	0.824561	47	0	0	1	0	1	1	1	1	0	1	1	0	1	1	1	1	0	1	1	0	0	1	0	1	1	1	1	1	1	1	1	0	1	1	1	1	1	1	1	1	1	1	1	1
BC010501.1	IOH10253	Catenin delta-1	4790.74	0.666667	38	0	0	1	0	1	1	1	0	1	1	0	0	1	1	0	0	0	0	1	0	0	1	0	0	1	1	1	0	1	1	0	1	1	1	1	1	1	0	1	1	1	1	0	1
BC093051.1	IOH63174	Nuclear protein Hcc-1	4788.42	0.736842	42	0	0	0	1	1	1	1	1	0	1	0	0	1	1	1	0	0	1	1	0	0	1	0	1	1	1	1	0	1	1	1	1	1	1	1	1	1	0	1	1	1	0	1	1
NM_144982.1	IOH12275	coiled-coil domain containing 131 (CCDC131)	4785.17	0.807018	46	0	0	1	0	1	1	1	1	1	1	1	0	1	1	1	0	0	1	1	0	0	1	0	1	1	1	1	0	1	1	1	1	1	1	1	1	1	1	1	1	1	1	1	1
NM_148176.1	IOH4678	peptidylprolyl isomerase (cyclophilin)-like 2 (PPIL2), transcript variant 3	4752.68	0.736842	42	0	0	1	1	1	1	1	1	1	1	1	0	1	1	1	0	0	1	0	0	0	1	0	1	1	1	0	0	1	1	1	0	1	0	1	1	1	0	1	1	1	1	1	1
BC002369.1		Serine/threonine-protein kinase PLK1	4730.45	0.77193	44	0	0	1	0	1	1	1	0	0	1	1	0	1	1	0	0	0	1	1	0	0	1	0	1	1	1	1	1	1	1	1	1	1	1	1	1	1	1	1	1	1	1	1	1
NM_025241.1	IOH41143	UBX domain containing 1 (UBXD1)	4722.96	0.736842	42	0	0	1	0	1	1	1	1	1	1	1	0	1	1	0	1	0	1	0	0	0	1	0	1	1	1	0	0	1	1	1	1	1	0	1	1	1	0	1	1	1	1	1	1
NM_001092.3	IOH39490	active BCR-related gene (ABR), transcript variant 2	4706.23	0.684211	39	0	0	0	0	1	1	1	0	1	1	0	0	1	0	1	0	0	1	1	0	0	1	0	1	0	1	1	1	1	1	1	1	1	1	1	1	1	0	1	1	1	1	1	1
BC035404.2	IOH27426	PTK2 protein tyrosine kinase 2 (PTK2)	4704.15	0.701754	40	0	0	0	0	1	1	1	1	0	1	0	0	1	1	0	1	0	1	1	0	0	0	0	1	1	1	1	0	1	1	1	1	1	1	0	0	1	1	1	1	1	1	1	1
NM_015138.2	IOH10055	Rtf1, Paf1/RNA polymerase II complex component, homolog (S. cerevisiae) (RTF1)	4702.11	0.684211	39	0	0	0	0	1	1	1	1	0	1	1	0	1	1	0	0	0	0	1	0	0	1	0	0	1	1	1	0	1	1	1	1	1	1	1	1	1	1	1	1	1	0	1	1
NM_023940.1	IOH6072	RAS-like, family 11, member B (RASL11B)	4688.13	0.789474	45	0	0	1	0	1	1	1	0	1	1	0	0	1	1	1	1	0	1	0	0	0	1	0	1	1	1	1	1	1	1	1	1	1	1	1	1	1	1	1	1	1	1	1	1
NM_020417.1	IOH46271	T-box transcription factor TBX20	4684.24	0.631579	36	0	0	0	0	1	1	1	1	0	1	1	0	1	1	1	0	0	1	1	1	0	1	0	1	1	1	0	0	0	1	1	1	1	0	1	1	1	0	0	1	1	1	0	1
BC036056.1	IOH27184	Fanconi anemia, complementation group M (FANCM)	4681.84	0.842105	48	0	0	1	0	1	1	1	1	1	1	1	0	1	1	1	0	0	1	1	0	0	1	0	1	1	1	1	1	1	1	1	1	1	1	1	1	1	1	1	1	1	1	1	1
BC009108.1	IOH10191	cDNA clone IMAGE:3451214 (MCM10)	4660.02	0.842105	48	0	0	1	0	1	1	1	1	1	1	1	0	1	1	1	1	0	1	1	0	1	1	0	1	1	1	1	0	1	1	1	1	1	0	1	1	1	1	1	1	1	1	1	1
BC014969.1	IOH12203	activating transcription factor 6 (ATF6)	4639.43	0.807018	46	0	0	1	0	1	1	1	1	1	1	1	0	1	1	1	1	0	1	1	0	0	1	0	1	1	1	1	0	1	1	1	1	0	1	1	1	1	1	1	1	1	1	1	1
NM_005517.2	IOH40568	high-mobility group nucleosomal binding domain 2 (HMGN2)	4638.1	0.736842	42	0	0	1	0	1	1	1	1	1	1	0	0	1	1	0	0	0	1	0	0	0	1	0	1	1	1	1	0	1	1	1	1	1	0	1	1	1	1	1	1	1	1	1	1
BC000712.1	IOH4703	kinesin family member C1 (KIFC1)	4620.2	0.719298	41	0	0	1	0	1	1	1	1	0	1	0	0	1	1	1	0	0	1	0	0	0	0	0	1	1	1	1	0	1	1	1	1	1	1	1	1	1	1	1	1	1	1	1	1
NM_178151.1	IOH22620	doublecortex; lissencephaly, X-linked (doublecortin) (DCX), transcript variant 4	4603.27	0.736842	42	0	0	1	1	1	1	1	1	1	1	1	0	1	1	1	1	0	1	1	0	0	0	0	1	1	1	1	1	1	1	1	1	1	1	0	0	1	0	1	1	1	1	1	1
BC008741.1	IOH5919	PDZ and LIM domain 5 (PDLIM5)	4603.18	0.754386	43	0	0	0	1	1	1	1	1	0	0	1	0	1	1	1	1	0	1	1	0	0	1	0	1	1	1	1	0	1	1	1	1	0	1	1	1	1	0	1	1	1	1	1	1
BC029796.1	IOH22647	hypothetical protein BC014011 (LOC116349)	4580.75	0.859649	49	0	1	1	0	1	1	1	1	1	1	1	0	1	1	1	1	0	1	1	0	0	1	0	1	1	1	1	1	1	1	1	1	1	0	1	1	1	1	1	1	1	1	1	1
NM_002813.4	IOH3657	proteasome (prosome, macropain) 26S subunit, non-ATPase, 9 (PSMD9)	4563.5	0.789474	45	0	0	1	0	0	1	1	1	1	1	1	0	1	1	1	0	0	1	1	0	0	1	0	1	1	1	1	1	1	1	1	1	1	1	1	1	1	1	1	1	1	1	1	1
NM_178152.1	IOH20954	Neuronal migration protein doublecortin	4551.96	0.824561	47	0	0	1	1	1	1	1	0	1	1	1	0	1	1	1	0	0	1	1	0	0	1	0	1	1	1	1	1	1	1	1	1	1	1	1	1	1	1	1	1	1	1	1	1
BC054520.1	IOH28900	myocyte enhancer factor 2D (MEF2D)	4549.2	0.736842	42	0	0	1	0	1	1	1	0	1	1	0	0	1	0	1	0	0	1	0	0	0	1	0	1	1	1	1	0	1	1	1	1	1	1	1	1	1	1	1	1	1	1	1	1
BC017570.1	IOH27880	chromosome 9 open reading frame 78 (C9orf78)	4541.34	0.754386	43	0	0	0	0	1	1	1	1	0	1	1	0	1	1	1	1	0	1	1	0	0	1	0	1	1	1	0	0	1	1	1	1	1	1	1	1	1	1	1	1	1	1	1	1
NM_018357.2	IOH6558	La ribonucleoprotein domain family, member 6 (LARP6), transcript variant 1	4537.39	0.77193	44	0	0	1	0	1	1	1	0	1	1	0	0	1	1	1	1	0	1	1	0	0	1	0	1	1	1	1	1	1	1	1	1	1	0	1	1	1	0	1	1	1	1	1	1
BC046117.1	IOH26985	dynein, axonemal, light intermediate chain 1 (DNALI1)	4534.52	0.719298	41	0	0	1	0	1	1	1	1	1	1	1	0	0	0	1	1	0	1	1	0	0	1	0	1	1	1	0	0	1	1	0	1	1	1	0	1	1	0	1	1	1	1	1	1
NM_007030.1	IOH43477	tubulin polymerization promoting protein (TPPP)	4533.79	0.824561	47	0	0	1	0	1	1	1	1	1	1	0	1	1	1	1	1	0	1	1	0	0	1	0	1	1	1	1	0	1	1	1	1	1	1	1	1	1	1	1	1	1	1	1	1
BC006106.1	IOH6536	ribosomal protein S6 kinase, 70kDa, polypeptide 2 (RPS6KB2)	4529.32	0.736842	42	0	0	0	0	1	1	1	1	0	1	1	0	1	1	1	0	0	1	1	0	0	1	0	1	1	1	1	0	1	1	1	1	1	0	1	1	1	0	1	1	1	1	1	1
NM_004349.2	IOH36626	runt-related transcription factor 1; translocated to, 1 (cyclin D-related) (RUNX1T1), transcript variant 1	4523.31	0.701754	40	0	0	0	0	1	1	1	0	0	1	1	0	1	1	1	1	0	1	1	0	0	1	0	1	1	1	1	1	1	1	1	1	0	0	0	1	1	0	1	1	1	1	1	1
PV3878		MAP/microtubule affinity-regulating kinase 2 (MARK2), transcript variant 3	4514.42	0.719298	41	0	0	0	0	1	1	1	1	1	1	0	0	1	0	1	0	0	0	0	0	0	1	0	1	1	1	1	1	1	1	1	1	1	0	1	1	1	1	1	1	1	1	0	1
BC011707.1	IOH13976	nuclear receptor binding factor 2 (NRBF2)	4465.33	0.789474	45	0	0	1	1	1	0	1	0	1	1	0	0	1	1	1	1	0	1	1	0	0	1	0	1	1	1	1	0	1	1	1	1	1	1	1	1	1	1	1	1	1	1	1	1
NM_014891.1	IOH4282	PDGFA associated protein 1 (PDAP1)	4424.01	0.754386	43	0	1	1	1	1	1	1	0	0	1	0	0	1	1	1	0	0	1	1	0	0	1	0	1	1	1	1	1	1	1	1	1	1	1	0	1	1	1	0	1	1	1	1	1
NM_022140.2	IOH38016	Band 4.1-like protein 4A	4415.95	0.789474	45	0	0	1	0	1	1	1	1	1	1	1	0	1	1	1	0	0	1	1	0	0	1	0	0	1	1	1	0	1	1	1	1	1	1	1	1	1	1	1	1	1	1	1	1
NM_138419.1	IOH22975	Protein FAM54A	4397.79	0.824561	47	0	0	1	1	1	1	1	1	1	1	1	0	1	1	1	0	0	1	1	0	0	1	0	1	1	1	1	0	1	1	1	1	1	1	1	1	1	1	1	0	1	1	1	1
BC014924.1	IOH25747	kinesin family member 2C (KIF2C)	4389.04	0.807018	46	1	0	0	0	1	1	1	1	0	1	1	0	1	1	1	1	0	1	1	0	0	1	0	1	1	1	1	1	1	1	1	1	1	1	1	1	1	1	1	1	1	1	1	1
BC021573.1	IOH14848	GTP-binding protein 10	4386.57	0.736842	42	0	0	1	0	1	1	1	0	1	1	1	0	1	1	0	1	0	1	1	0	0	1	0	1	1	1	1	0	0	1	1	1	0	1	1	1	1	1	1	1	1	1	0	1
NM_004450.1	IOH14288	enhancer of rudimentary homolog (Drosophila) (ERH)	4381.54	0.789474	45	0	0	1	0	1	1	1	1	1	1	1	0	1	1	1	0	0	1	1	0	0	1	0	1	1	1	0	0	1	1	1	1	1	0	1	1	1	1	1	1	1	1	1	1
NM_033082.1	IOH7469	Nuclear protein Hcc-1	4375.53	0.666667	38	0	0	0	1	1	0	1	1	0	1	1	1	1	1	1	1	0	1	1	0	0	1	0	1	1	1	0	0	1	1	0	1	1	1	0	0	1	0	1	1	0	1	0	0
NM_006788.2	IOH10874	RalA-binding protein 1	4372.9	0.754386	43	0	0	1	0	1	1	1	0	1	1	0	0	1	1	1	1	0	1	0	0	0	0	0	1	1	1	1	1	1	1	1	1	1	1	1	1	1	1	1	0	1	1	1	1
NM_080664.1	IOH9768	chromosome 14 open reading frame 126 (C14orf126)	4358.83	0.754386	43	0	0	0	0	1	1	0	0	0	1	1	0	1	1	1	1	0	1	1	0	0	1	0	1	1	1	0	1	1	1	1	1	0	1	1	1	1	1	1	1	1	1	1	1
BC059947.1	IOH39895	chondrosarcoma associated gene 1 (CSAG1)	4348.7	0.736842	42	0	0	1	0	1	1	1	1	1	1	1	0	1	1	1	0	0	1	1	0	0	0	0	1	1	1	1	0	1	1	1	1	1	1	1	0	1	0	1	1	1	1	1	1
BC007363.1	IOH21168	branched chain ketoacid dehydrogenase kinase (BCKDK)	4327.22	0.859649	49	0	0	1	0	1	1	1	1	1	1	1	0	1	1	1	1	0	1	1	0	0	1	0	1	1	1	1	1	1	1	1	1	1	1	1	1	1	1	1	1	1	1	1	1
BC022996.1	IOH10666	SH3 domain-binding protein 2	4322.58	0.684211	39	0	0	1	0	1	1	1	0	1	1	1	0	1	1	1	1	0	1	1	0	0	1	0	1	0	1	1	0	0	1	1	1	0	1	1	0	1	0	1	1	1	1	1	1
NM_152340.1	IOH42183	hypothetical protein FLJ39075 (FLJ39075)	4306.5	0.736842	42	0	0	0	0	1	1	0	0	0	0	0	0	1	1	1	0	0	1	1	0	0	1	0	1	1	1	1	1	1	1	1	1	1	1	1	1	1	1	1	1	1	1	1	1
NM_006148.1	IOH54875	LIM and SH3 domain protein 1	4293.89	0.719298	41	0	0	1	0	1	1	0	1	1	1	1	1	1	0	1	0	0	1	1	0	0	1	0	0	1	1	1	0	1	1	1	1	1	0	1	1	1	0	1	1	1	1	1	1
XM_378514.1	IOH42688	PREDICTED: Homo sapiens hypothetical protein LOC283663 (LOC283663), mRNA	4285.09	0.807018	46	0	0	1	0	1	1	1	1	1	1	1	0	1	1	1	1	0	1	1	0	0	1	0	1	1	1	1	0	1	1	1	1	1	1	1	1	1	1	1	1	1	1	1	1
BC053562.1	IOH29038	CREB regulated transcription coactivator 2 (CRTC2)	4281.67	0.736842	42	0	0	1	0	1	1	1	0	1	1	0	0	1	0	1	0	0	1	1	0	0	1	0	1	1	1	1	0	1	1	0	1	1	1	1	1	1	1	1	0	1	1	1	1
NM_003893.2	IOH3707	LIM domain-binding protein 1	4276.62	0.754386	43	0	0	1	0	1	1	1	0	1	0	1	1	1	1	1	1	0	1	1	0	0	1	0	1	1	1	1	0	1	1	1	1	0	1	1	1	1	0	1	1	1	0	1	1
BC018060.1	IOH11303	Ras-like without CAAX 2 (RIT2)	4268.82	0.719298	41	0	0	0	0	1	1	1	1	0	1	1	0	1	1	1	0	0	1	1	0	0	1	0	1	1	1	0	0	1	1	1	1	1	1	0	1	1	0	1	1	1	1	1	1
NM_152387.2	IOH53987	BTB/POZ domain-containing protein KCTD18	4264.99	0.824561	47	0	0	1	0	1	1	1	1	1	1	1	0	1	1	1	1	0	1	1	0	0	1	0	1	1	1	1	1	1	1	1	1	1	0	1	1	1	1	1	1	1	1	1	1
NM_024309.1	IOH5379	TNFAIP3-interacting protein 2	4264.27	0.824561	47	0	0	1	0	1	1	1	1	1	1	1	0	1	1	1	1	0	1	1	0	0	1	0	1	1	1	1	0	1	1	1	1	0	1	1	1	1	1	1	1	1	1	1	1
NM_004846.1	IOH6102	eukaryotic translation initiation factor 4E family member 2 (EIF4E2)	4247.96	0.77193	44	0	0	0	0	1	0	1	1	1	1	1	0	1	1	1	0	0	1	1	0	0	1	0	1	1	1	1	1	1	1	1	1	1	1	1	0	1	1	1	1	1	1	1	1
NM_203305.1	IOH26383	family with sequence similarity 102, member A (FAM102A), transcript variant 2	4235.32	0.649123	37	0	0	1	0	1	1	1	1	1	1	1	0	1	1	1	1	0	1	1	0	0	1	0	1	1	1	1	0	0	1	0	1	0	1	1	0	1	0	0	1	0	1	0	1
BC037567.1	IOH27585	alanine-glyoxylate aminotransferase 2-like 2 (AGXT2L2)	4228.62	0.736842	42	0	0	0	0	1	0	1	1	0	0	0	0	1	1	1	0	0	1	1	0	0	1	0	1	1	1	1	1	1	1	1	1	1	1	1	1	1	1	1	1	1	1	1	1
NM_175634.1	IOH42249	Protein CBFA2T1	4227.25	0.719298	41	0	0	0	0	1	1	1	0	0	1	1	0	1	1	1	0	0	1	1	0	0	1	0	1	1	1	1	1	1	1	1	1	0	0	0	1	1	1	1	1	1	1	1	1
NM_198395.1	IOH7337	GTPase activating protein (SH3 domain) binding protein 1 (G3BP1), transcript variant 2	4183.53	0.77193	44	0	0	1	0	1	1	1	1	1	1	1	0	1	1	1	0	0	1	1	0	0	1	0	1	1	1	1	0	1	1	1	1	1	1	1	0	1	0	1	1	1	1	1	1
NM_014923.2	IOH44828	fibronectin type III domain containing 3A (FNDC3A), transcript variant 2	4167.66	0.736842	42	0	0	0	0	1	1	1	0	0	1	1	1	1	1	1	0	0	1	1	0	0	1	0	1	1	1	1	0	1	1	1	1	1	0	1	1	1	1	1	1	1	1	1	1
BC060773.1	IOH29187	SRY (sex determining region Y)-box 5 (SOX5)	4161.29	0.701754	40	0	0	1	0	1	1	1	0	1	0	0	0	1	0	1	0	0	1	0	0	1	1	0	1	1	1	1	0	1	1	1	1	0	1	1	1	1	1	1	1	1	1	1	1
NM_018328.1	IOH12893	methyl-CpG binding domain protein 5 (MBD5)	4140.24	0.807018	46	0	0	0	0	1	1	1	0	0	1	1	0	1	1	1	1	0	1	1	0	0	1	0	1	1	1	1	1	1	1	1	1	1	1	1	1	1	1	1	1	1	1	1	1
BC027951.1	IOH11889	Cas scaffolding protein family member 4	4137.01	0.754386	43	0	0	0	0	1	1	1	1	0	1	1	0	1	1	1	0	0	1	0	0	0	1	0	1	1	1	1	0	1	1	1	1	1	1	1	1	1	1	1	1	1	1	1	1
BC014452.1	IOH14883	cDNA clone IMAGE:4903661, complete cds	4130.75	0.736842	42	0	0	1	0	1	0	0	0	0	1	0	0	1	1	1	1	0	1	1	0	0	1	0	1	1	1	1	0	1	1	1	1	1	1	1	1	1	1	1	1	1	1	1	1
NM_015532.2	IOH12446	glutamate receptor, ionotropic, N-methyl D-aspartate-like 1A (GRINL1A), transcript variant 1	4127.18	0.754386	43	0	0	1	0	1	1	1	1	1	1	1	0	0	1	1	1	0	1	0	1	0	1	0	0	1	1	1	0	1	1	1	1	1	1	0	1	1	1	1	1	1	1	1	1
BC027729.1	IOH14530	tetra-peptide repeat homeobox-like (TPRXL)	4119.47	0.684211	39	0	1	0	0	1	0	0	1	0	1	0	0	1	0	1	0	0	1	0	0	0	0	0	1	1	1	1	0	1	1	1	1	1	1	1	1	1	1	1	0	1	1	1	1
NM_005659.1	IOH4744	ubiquitin fusion degradation 1 like (yeast) (UFD1L), transcript variant 1, mRNA.	4109.56	0.701754	40	0	0	1	0	1	1	1	1	1	1	1	0	1	1	1	1	0	1	1	0	0	1	0	1	0	1	1	0	1	0	0	1	1	1	1	1	1	0	0	1	1	1	1	1
NM_019070.1	IOH5264	DEAD (Asp-Glu-Ala-Asp) box polypeptide 49 (DDX49)	4107.29	0.789474	45	0	0	1	0	1	1	1	1	1	1	1	0	1	1	1	1	0	1	1	0	0	0	0	1	1	1	1	1	1	1	1	1	1	0	0	1	1	1	1	1	1	1	1	1
BC007852.1		Serine/threonine-protein kinase 25	4105.5	0.701754	40	0	0	1	0	1	1	1	1	1	1	1	0	1	1	1	0	0	1	1	0	0	1	0	1	1	1	0	0	1	1	0	1	1	1	1	1	1	1	0	1	1	0	0	1
BC003065.1		Cell division protein kinase 2	4090.44	0.77193	44	0	0	0	0	1	1	1	1	0	1	1	0	1	1	0	0	0	1	1	0	0	1	0	1	1	1	1	1	1	1	1	1	1	1	1	1	1	1	1	1	1	1	1	1
NM_016564.1	IOH22629	cell cycle exit and neuronal differentiation 1 (CEND1)	4066.15	0.666667	38	0	0	0	0	1	1	1	0	0	1	1	0	1	1	1	1	0	1	1	0	0	1	0	1	1	1	1	1	1	1	1	1	1	1	0	1	1	0	0	1	0	1	1	0
BC001247.1	IOH3075	LIM domain and actin-binding protein 1	4064.16	0.789474	45	0	0	1	1	1	1	1	0	1	1	0	0	1	1	1	1	0	1	1	0	0	1	0	1	1	1	1	1	1	1	1	1	1	1	1	1	1	1	0	1	1	1	1	1
NM_152328.3	IOH26952	adenylosuccinate synthase like 1 (ADSSL1), transcript variant 2	4054.32	0.666667	38	0	0	1	0	1	1	1	1	1	0	0	0	0	1	1	1	0	1	1	0	0	1	0	1	1	1	1	0	0	1	1	1	0	0	1	1	1	1	1	1	1	1	1	1
NM_022776.3	IOH40437	oxysterol binding protein-like 11 (OSBPL11)	4052.74	0.77193	44	0	0	0	1	1	1	1	0	0	1	1	0	1	1	1	0	0	1	1	0	0	1	0	1	1	1	1	0	1	0	1	1	1	1	1	1	1	1	1	1	1	1	1	1
NM_003981.2	IOH5138	protein regulator of cytokinesis 1 (PRC1), transcript variant 1	4029.54	0.789474	45	0	0	1	0	1	1	1	1	1	1	1	0	1	1	1	1	0	1	0	0	0	1	0	1	1	1	0	0	1	1	1	1	1	1	1	1	1	0	1	1	1	1	1	1
NM_173621.1	IOH43334	chromosome 17 open reading frame 44 (C17orf44)	4028.3	0.684211	39	0	0	0	0	1	0	1	0	0	1	0	0	1	0	1	0	0	1	0	0	0	0	0	1	1	1	1	1	1	1	1	1	1	1	1	1	1	1	1	1	1	1	1	1
BC006105.1	IOH5992	chromosome 6 open reading frame 134 (C6orf134)	4028.17	0.824561	47	0	0	1	0	1	1	1	1	0	1	1	0	1	1	1	1	0	1	1	0	0	1	0	1	1	1	1	1	1	1	1	1	1	1	1	1	1	1	1	1	1	1	1	1
BC000770.1	IOH4688	death inducer-obliterator 1 (DIDO1)	4023.54	0.77193	44	0	0	1	0	1	1	1	1	1	1	0	1	1	1	1	0	0	1	0	0	0	1	0	1	1	1	1	0	1	1	1	1	1	1	1	1	1	1	1	1	1	1	1	1
NM_152259.2	IOH44110	Uncharacterized protein C15orf42	4022.45	0.614035	35	0	0	1	0	0	0	0	0	1	1	0	0	0	0	0	0	0	0	0	0	0	0	0	1	1	1	1	0	1	1	1	1	1	1	1	1	1	1	1	1	1	1	1	1
NM_022822.1	IOH22120	kinesin light chain 2 (KLC2)	4008.18	0.789474	45	0	0	1	0	1	1	1	1	1	1	1	0	1	1	1	0	0	1	1	0	0	1	0	1	1	1	1	1	1	1	1	1	1	1	1	1	1	1	1	1	1	1	1	0
BC051762.1	IOH28838	Uncharacterized protein C20orf96	3999.51	0.824561	47	0	0	1	0	1	1	1	1	0	1	1	0	1	1	1	1	0	1	0	0	0	1	0	1	1	1	1	1	1	1	1	1	1	1	1	1	1	1	1	1	1	1	1	1
XM_374177.2	IOH43615	PREDICTED: Homo sapiens hypothetical LOC389415 (LOC389415)	3992.12	0.754386	43	0	0	1	0	1	1	1	1	1	1	1	0	1	1	1	1	0	1	1	0	0	1	0	1	1	1	1	0	1	1	1	1	0	0	1	1	1	1	1	1	1	0	1	1
NM_022347.1	IOH41552	interferon responsive gene 15 (IFRG15)	3990.92	0.789474	45	0	0	1	0	1	1	1	1	1	1	1	0	1	1	1	1	0	1	1	0	0	1	0	1	1	1	0	0	1	1	1	1	1	1	1	0	1	1	1	1	1	1	1	1
NM_024591.1	IOH13020	chromatin modifying protein 6 (CHMP6)	3979.31	0.789474	45	0	1	1	0	1	1	1	1	0	1	0	0	1	1	1	0	0	1	1	0	0	1	0	1	0	1	1	0	1	1	1	1	1	1	1	1	1	1	1	1	1	1	1	1
NM_020651.2	IOH26519	pellino homolog 1 (Drosophila) (PELI1)	3976.33	0.684211	39	0	0	0	0	1	1	1	0	0	0	0	0	1	1	1	0	0	1	0	0	0	1	0	1	1	1	1	0	1	1	1	1	1	0	1	1	1	1	1	1	1	1	1	1
BC019015.2	IOH12089	mediator complex subunit 29 (MED29)	3968.19	0.614035	35	0	0	0	0	0	1	1	0	0	0	1	0	0	0	1	0	0	1	0	0	0	0	0	0	0	1	1	0	1	1	1	1	1	1	1	1	1	1	1	1	0	1	1	1
NM_006912.3	IOH29584	Ras-like without CAAX 1 (RIT1)	3951.9	0.736842	42	0	0	1	1	1	1	1	0	0	1	0	0	1	1	1	1	0	1	1	0	0	1	0	1	1	1	1	0	1	1	1	1	1	1	1	0	1	0	1	1	1	0	1	1
NM_001182.2	IOH45681	aldehyde dehydrogenase 7 family, member A1 (ALDH7A1)	3930.69	0.789474	45	0	0	1	0	1	1	0	1	0	1	1	0	1	1	1	1	0	1	1	0	0	1	0	1	1	1	1	0	1	1	1	1	1	1	1	1	1	1	1	1	1	1	1	1
NM_014288.2	IOH13691	Centromere protein R	3922.41	0.77193	44	0	0	1	0	1	1	1	1	0	1	0	0	1	1	1	1	0	1	1	0	0	1	0	1	1	1	1	0	1	1	1	1	1	0	1	1	1	1	1	1	1	1	1	1
NM_032641.1	IOH4981	splA/ryanodine receptor domain and SOCS box containing 2 (SPSB2)	3919.95	0.77193	44	0	0	1	1	1	1	1	1	1	1	1	0	1	1	1	1	0	1	1	0	0	1	0	1	1	1	1	0	1	1	1	1	0	1	1	1	1	0	1	1	1	0	1	1
BC014385.1	IOH29333	integrin beta 3 binding protein (beta3-endonexin) (ITGB3BP)	3915.05	0.807018	46	0	0	1	1	1	1	1	1	1	1	0	0	1	1	1	1	0	1	0	0	0	1	0	1	1	1	1	0	1	1	1	1	1	1	1	1	1	1	1	1	1	1	1	1
BC101026.2	IOH63533	Spindle assembly abnormal protein 6 homolog	3909.25	0.736842	42	0	0	1	0	1	1	1	1	1	1	1	0	1	1	1	1	0	1	1	0	0	1	0	1	0	1	1	0	0	1	1	1	1	0	1	1	1	1	1	1	1	1	1	1
BC040946.1	IOH26289	CWC15 homolog (S. cerevisiae) (HSPC148)	3889.13	0.736842	42	0	0	1	0	1	1	1	0	0	0	0	0	1	1	1	0	0	1	1	0	0	1	0	1	1	1	1	1	1	1	0	1	1	1	1	1	1	1	1	1	1	1	1	1
BC002921.2	IOH6311	p21(CDKN1A)-activated kinase 4 (PAK4)	3888.05	0.789474	45	0	0	1	1	1	1	1	1	1	1	0	0	1	1	1	1	0	1	1	0	0	1	0	1	1	1	1	0	1	1	1	1	0	0	1	1	1	1	1	1	1	1	1	1
NM_006374.2	IOH6735	serine/threonine kinase 25 (STE20 homolog, yeast) (STK25)	3887.9	0.684211	39	0	0	1	0	1	1	1	1	1	1	1	0	1	1	1	0	0	1	1	0	0	1	0	1	1	1	0	0	1	1	0	1	1	1	1	0	1	1	1	1	1	0	0	1
BC012746.1	IOH14565	mesoderm development candidate 2 (MESDC2)	3884.07	0.701754	40	0	0	1	0	1	1	1	1	0	1	1	0	1	1	1	1	0	1	0	0	0	1	0	1	1	1	1	0	0	1	1	1	1	1	1	1	1	0	1	0	1	1	1	1
NM_032514.2	IOH10043	microtubule-associated protein 1 light chain 3 alpha (MAP1LC3A), transcript variant 1	3874.1	0.807018	46	0	0	1	0	1	1	1	1	1	1	1	0	1	1	1	1	0	1	1	0	0	1	0	1	1	1	1	0	1	1	1	1	1	1	1	1	1	1	1	1	1	1	1	1
NM_144664.3	IOH45592	Protein FAM76B	3871.11	0.789474	45	0	0	1	1	1	1	1	1	1	1	1	0	1	1	0	0	0	1	1	0	0	1	0	1	1	1	1	0	1	1	1	1	1	1	1	1	1	0	1	1	1	1	1	1
BC009779.1	IOH12227	outer dense fiber of sperm tails 2-like (ODF2L)	3841.57	0.719298	41	0	0	0	0	1	1	0	0	0	1	1	0	1	1	1	1	0	1	1	0	0	1	0	1	1	0	1	0	1	1	1	1	1	1	1	1	1	1	1	1	1	0	1	1
NM_205853.1	IOH43061	musculoskeletal, embryonic nuclear protein 1 (MUSTN1)	3818.07	0.719298	41	0	0	1	1	1	1	1	0	1	0	0	0	1	1	1	0	0	1	1	0	0	1	0	1	1	1	1	0	1	1	1	1	0	0	1	1	1	1	1	1	1	1	1	1
BC066958.1	IOH61486	splicing factor, arginine/serine-rich 2, mRNA (cDNA clone MGC:87440 IMAGE:4837392), complete cds	3810.28	0.719298	41	0	0	1	0	1	1	1	1	0	0	1	0	1	1	1	1	0	1	1	0	0	1	0	1	1	1	1	0	1	1	1	1	1	0	1	1	1	1	1	1	1	1	1	1
NM_016508.2	IOH21339	Cyclin-dependent kinase-like 3	3810.21	0.842105	48	0	0	1	0	1	1	1	1	1	1	1	0	1	1	1	0	0	1	1	0	0	1	0	1	1	1	1	1	1	1	1	1	1	1	1	1	1	1	1	1	1	1	1	1
NM_030636.1	IOH39935	Endonuclease/exonuclease/phosphatase family domain-containing protein 1	3798.48	0.701754	40	0	0	1	0	1	1	1	1	1	1	1	0	1	1	1	0	0	1	1	0	0	1	0	1	0	1	1	0	1	1	1	1	1	1	1	0	1	1	1	1	0	1	1	1
NM_003668.2	IOH28010	mitogen-activated protein kinase-activated protein kinase 5 (MAPKAPK5), transcript variant 1	3792.84	0.736842	42	0	0	1	0	1	1	1	1	1	1	0	0	1	0	1	0	0	0	1	0	0	1	0	1	1	1	1	0	1	1	1	1	1	1	1	1	1	1	1	1	0	1	1	1
BC036723.1	IOH22599	Fc fragment of IgG, low affinity IIIa, receptor (CD16a) (FCGR3A)	3792.64	0.719298	41	0	0	1	0	1	1	1	1	0	0	0	0	0	0	1	1	0	1	1	0	0	0	0	0	1	1	1	1	1	1	1	1	1	1	1	1	1	1	1	1	1	1	1	1
NM_005335.3	IOH57089	Hematopoietic lineage cell-specific protein	3788.2	0.719298	41	0	0	1	0	1	1	1	1	1	0	0	0	1	1	1	1	0	1	1	0	0	1	0	1	1	1	1	0	1	1	1	1	0	1	1	0	1	0	1	1	1	1	1	1
BC019315.1	IOH27769	N-acetylneuraminic acid synthase (sialic acid synthase) (NANS)	3788.09	0.701754	40	0	0	0	0	1	1	0	0	0	1	1	0	1	1	1	0	0	1	1	0	0	1	0	1	1	1	1	0	1	1	1	1	1	0	0	1	1	0	1	1	1	1	1	1
P3049		v-abl Abelson murine leukemia viral oncogene homolog 1 (ABL1), transcript variant a; see catalog number for detailed information on wild-type or point mutant status	3785.81	0.701754	40	0	0	1	0	1	1	1	1	0	1	1	0	1	1	1	0	0	1	1	0	0	1	0	1	1	1	0	0	1	1	0	1	1	1	1	1	1	0	1	0	1	1	1	0
BC004236.2	IOH3887	ubiquitin-conjugating enzyme E2S (UBE2S)	3780.61	0.631579	36	0	0	1	0	1	0	1	0	0	0	0	0	1	1	1	0	0	1	1	0	0	0	0	1	1	1	1	0	1	0	1	1	1	1	0	1	1	0	1	1	1	1	1	1
BC024254.1	IOH13735	abl-interactor 1 (ABI1)	3776.89	0.754386	43	0	0	1	0	1	1	1	1	1	1	0	0	1	1	1	1	0	1	1	0	0	1	0	1	1	1	0	0	1	1	1	1	1	1	1	1	1	0	1	1	0	1	1	1
BC029524.1	IOH22562	Coiled-coil domain-containing protein 46	3773.97	0.736842	42	0	0	0	0	1	1	0	1	0	1	1	0	1	1	1	1	0	1	1	0	0	1	0	1	1	1	1	0	1	1	1	1	1	0	1	1	1	0	1	1	1	1	1	1
BC006375.2	IOH6475	dual-specificity tyrosine-(Y)-phosphorylation regulated kinase 2 (DYRK2)	3764.26	0.719298	41	0	0	0	0	1	1	1	0	1	1	1	0	1	1	1	0	0	1	0	0	0	0	0	1	1	1	1	0	1	1	1	1	1	1	1	1	1	0	1	1	1	1	1	1
NM_032636.2	IOH4088	proline/serine-rich coiled-coil 1 (PSRC1), transcript variant 1	3764.15	0.736842	42	0	0	1	0	1	1	1	1	1	1	1	0	1	1	1	0	0	1	1	0	0	1	0	1	1	1	1	0	1	1	1	1	1	0	0	1	1	0	1	1	1	1	1	1
NM_001290.1	IOH23054	LIM domain binding 2 (LDB2)	3760.31	0.754386	43	0	0	0	0	1	1	1	1	0	1	1	0	1	1	1	0	0	1	1	0	0	1	0	1	1	1	1	0	1	1	1	1	1	1	1	1	1	0	0	1	1	1	1	1
BC036123.1	IOH27289	stromal membrane-associated protein 1 (SMAP1)	3755.13	0.754386	43	0	0	1	0	1	1	1	0	1	1	0	0	1	1	1	1	0	1	1	0	0	1	0	1	0	1	1	0	1	1	1	1	1	1	1	1	1	0	1	1	1	1	1	1
BC003549.1	IOH4987	enoyl Coenzyme A hydratase domain containing 1 (ECHDC1)	3749.4	0.754386	43	0	0	1	0	1	1	1	1	1	1	1	0	1	1	1	1	0	1	1	0	0	1	0	1	1	1	0	0	1	1	0	1	1	1	1	1	1	1	0	1	1	1	1	1
NM_138333.1	IOH10239	family with sequence similarity 122A (FAM122A)	3739.01	0.719298	41	0	0	1	0	1	1	1	1	1	1	1	0	1	1	1	1	0	1	0	0	0	1	0	0	1	1	1	0	1	1	1	1	1	1	0	1	1	0	1	1	1	0	1	1
BC060767.1	IOH29188	centaurin, beta 2 (CENTB2)	3738.38	0.631579	36	0	0	1	1	1	0	0	0	1	1	0	0	0	1	1	0	1	1	0	0	0	1	0	1	0	1	1	0	0	1	1	1	0	1	1	1	1	0	1	1	1	1	1	1
PV4333		BR serine/threonine kinase 1	3724.85	0.684211	39	0	0	0	0	1	1	1	1	0	1	1	0	0	1	1	0	0	1	0	0	0	1	0	1	1	1	1	0	1	1	1	1	1	0	1	1	1	1	1	1	1	1	1	0
BC022429.1	IOH23036	Lyrm7 homolog (mouse) (LYRM7)	3721.96	0.649123	37	0	0	0	0	1	1	1	0	0	1	0	0	0	1	1	0	0	1	0	0	0	1	0	1	1	1	1	0	1	1	1	1	1	0	1	1	1	1	1	1	1	1	1	1
BC022257.1	IOH12061	lectin, galactoside-binding, soluble, 14 (LGALS14)	3711.42	0.754386	43	0	0	0	0	1	1	1	0	0	1	1	0	1	1	1	1	0	1	0	0	0	1	0	1	1	1	1	0	1	1	1	1	1	1	1	1	1	1	1	1	1	1	1	1
BC005982.1	IOH7502	peptidylprolyl isomerase A (cyclophilin A) (PPIA)	3705.58	0.77193	44	0	0	1	0	1	1	1	1	1	1	0	0	1	1	1	0	0	1	1	0	0	1	0	1	1	1	1	0	1	1	1	1	1	1	1	1	1	1	1	1	1	1	1	1
NM_018297.2	IOH6809	N-glycanase 1 (NGLY1)	3693.02	0.684211	39	0	0	0	0	1	1	1	0	0	1	0	0	1	1	0	0	0	1	0	0	0	1	0	1	1	1	1	0	1	1	1	1	1	1	1	1	1	1	0	1	1	1	1	1
BC005248.1	IOH7358	eukaryotic translation initiation factor 1A, Y-linked (EIF1AY)	3674.99	0.736842	42	0	0	1	0	1	1	1	1	0	1	1	0	1	1	1	0	0	1	1	0	0	1	0	1	1	1	0	0	1	1	0	1	1	1	1	1	1	0	1	1	1	1	1	1
BC032851.2	IOH27168	Cas-Br-M (murine) ecotropic retroviral transforming sequence b (CBLB)	3666.75	0.701754	40	0	1	0	0	1	1	1	1	0	1	1	0	1	0	1	0	0	1	1	0	0	0	0	1	1	1	1	0	1	1	1	1	0	1	1	1	1	1	1	1	1	1	0	0
NM_015939.2	IOH3137	tRNA methyltransferase 6 homolog (S. cerevisiae) (TRMT6)	3665.01	0.684211	39	0	0	0	1	1	1	1	1	0	1	0	0	1	1	1	0	0	1	1	0	0	1	0	0	1	1	0	0	1	1	0	1	1	1	1	0	1	1	1	1	1	1	1	1
NM_007005.3	IOH52787	Transducin-like enhancer protein 4	3664.64	0.649123	37	0	0	0	0	1	1	1	1	0	0	0	0	1	1	0	0	0	0	1	0	0	1	0	1	0	1	1	1	1	1	1	1	1	1	1	1	1	0	1	1	1	1	1	1
NM_001001550.1	IOH13204	growth factor receptor-bound protein 10 (GRB10), transcript variant 3	3663.75	0.736842	42	0	0	0	0	1	1	0	1	0	1	0	0	1	1	1	0	0	1	1	0	0	1	0	1	1	1	1	1	1	1	1	1	1	1	1	1	1	1	1	1	1	1	1	1
BC032347.1	IOH21704	chromosome 8 open reading frame 59 (C8orf59)	3657.96	0.789474	45	0	0	1	0	1	1	1	1	1	1	1	1	1	1	1	0	0	1	1	0	0	1	0	1	1	1	1	1	1	1	1	1	1	0	1	1	1	0	1	1	1	0	1	1
BC059405.1	IOH40433	Transducin-like enhancer protein 4	3650.28	0.736842	42	0	0	0	1	1	1	1	1	0	1	0	0	0	1	1	0	0	1	1	0	0	1	0	1	1	1	1	0	0	1	1	1	1	1	1	1	1	1	1	1	1	1	1	1
BC060818.1	IOH29248	synaptosomal-associated protein, 91kDa homolog (mouse) (SNAP91)	3645.84	0.631579	36	0	0	1	0	0	1	1	0	1	1	0	0	1	1	1	0	0	1	1	0	0	1	0	1	1	1	1	0	1	1	0	1	0	1	0	1	1	0	0	1	1	1	1	0
BC038838.1	IOH28760	Proline-rich protein 16	3642.86	0.614035	35	0	0	1	0	1	1	1	1	1	1	1	0	1	1	1	1	0	1	1	0	0	1	0	1	0	1	0	0	1	1	1	1	1	0	0	0	1	0	1	1	0	1	1	1
NM_030881.2	IOH1750	DEAD (Asp-Glu-Ala-Asp) box polypeptide 17 (DDX17), transcript variant 2	3641.03	0.789474	45	0	0	1	0	1	1	1	0	0	1	1	0	1	1	1	1	0	1	1	0	0	1	0	1	1	1	1	1	1	1	1	1	1	0	1	1	1	1	1	1	1	1	1	1
BC094719.1	IOH62673	Rho GTPase-activating protein 12	3639.46	0.77193	44	0	0	0	0	1	1	1	1	0	1	1	0	1	1	1	1	0	1	1	0	0	1	0	1	1	1	1	0	1	1	1	1	1	1	1	1	1	0	1	1	1	1	1	1
BC059362.1	IOH29173	Ral guanine nucleotide dissociation stimulator	3631.46	0.684211	39	0	0	1	0	0	0	1	1	1	0	1	0	1	1	1	1	0	1	0	0	0	1	0	1	0	1	1	0	0	1	1	0	0	1	1	1	1	1	1	1	1	1	1	1
NM_139016.2	IOH27635	chromosome 20 open reading frame 198 (C20orf198)	3625.04	0.736842	42	0	0	0	0	1	1	1	1	0	1	0	0	1	1	1	1	0	1	1	0	0	1	0	1	1	1	1	0	1	1	1	1	1	0	1	0	1	1	1	1	1	1	1	1
NM_018956.2	IOH11209	chromosome 9 open reading frame 9 (C9orf9)	3621.71	0.666667	38	0	0	0	0	0	0	0	1	0	1	0	0	1	1	1	0	0	1	0	0	0	1	0	1	1	1	1	0	1	1	1	1	1	1	1	0	1	1	1	1	1	1	1	1
NM_007006.1	IOH4064	nudix (nucleoside diphosphate linked moiety X)-type motif 21 (NUDT21)	3615.75	0.824561	47	0	0	1	0	1	1	1	1	1	1	1	0	1	1	1	0	0	1	1	0	0	1	0	1	1	1	1	0	1	1	1	1	1	1	1	1	1	1	1	1	1	1	1	1
BC040949.1	IOH26268	myocyte enhancer factor 2D (MEF2D)	3613.69	0.666667	38	0	0	1	0	1	1	1	0	1	1	0	0	1	0	1	0	0	1	1	0	0	1	0	1	1	1	1	0	1	1	1	1	1	0	0	1	1	0	1	0	1	1	1	1
NM_004701.2	IOH41218	cyclin B2 (CCNB2)	3610.9	0.789474	45	0	0	1	0	1	1	1	1	1	1	0	0	1	1	1	0	0	1	0	0	0	1	0	1	1	1	1	1	1	1	1	1	1	0	1	1	1	1	1	1	1	1	1	1
BC017114.1	IOH9995	oligonucleotide/oligosaccharide-binding fold containing 2A (OBFC2A)	3608.78	0.789474	45	0	0	1	0	1	1	1	1	1	1	1	0	1	1	1	0	0	1	1	0	0	1	0	1	1	1	1	0	1	1	1	1	1	1	1	1	1	1	1	1	1	1	0	1
BC006423.1		Serine/threonine-protein kinase 6	3602.39	0.754386	43	0	0	1	0	1	1	1	1	0	1	1	0	1	1	1	0	0	1	0	0	0	1	0	1	1	1	0	0	1	1	1	1	1	1	1	1	1	1	1	1	1	1	1	1
NM_018457.1	IOH23026	proline rich 13 (PRR13), transcript variant 2	3600.48	0.701754	40	0	1	0	0	1	1	1	0	0	0	1	0	1	1	1	0	0	1	1	0	0	1	0	1	1	1	1	0	1	1	1	1	0	1	0	1	1	1	1	1	1	1	1	1
NM_032548.2	IOH45815	ankyrin repeat and BTB (POZ) domain containing 1 (ABTB1), transcript variant 1	3592.61	0.807018	46	0	0	0	0	1	1	1	1	1	1	1	0	1	1	1	1	1	1	1	0	0	1	0	1	1	1	1	0	1	1	1	1	1	1	1	1	1	0	1	1	1	1	1	1
NM_022474.2	IOH44175	membrane protein, palmitoylated 5 (MAGUK p55 subfamily member 5) (MPP5)	3589.82	0.649123	37	0	0	0	1	1	1	1	0	0	0	0	0	1	1	1	0	1	1	0	0	0	0	0	1	0	1	1	0	1	1	1	1	1	1	1	0	1	0	1	1	1	1	1	1
NM_018282.1	IOH12080	Paraspeckle component 1	3577.96	0.666667	38	0	0	0	0	1	1	1	1	0	0	0	0	1	1	1	0	0	1	1	0	0	1	0	0	1	1	1	1	1	1	1	1	0	1	1	1	1	0	1	1	1	0	1	1
NM_153822.1	IOH41107	proteasome (prosome, macropain) 26S subunit, non-ATPase, 4 (PSMD4), transcript variant 2	3577.45	0.666667	38	0	0	0	0	1	1	0	1	0	1	0	0	1	1	1	0	0	1	1	0	0	0	0	1	1	1	1	0	1	1	1	0	1	1	1	1	1	1	1	1	0	1	0	1
BC001280.1	IOH21165	Serine/threonine-protein kinase 6	3570.43	0.754386	43	0	0	1	0	1	1	1	1	0	1	1	0	1	1	1	0	0	1	1	0	0	1	0	1	1	1	1	0	1	1	1	1	1	1	1	0	1	0	1	1	1	1	1	1
NM_006428.3	IOH40570	mitochondrial ribosomal protein L28 (MRPL28), nuclear gene encoding mitochondrial protein	3567.68	0.684211	39	0	0	0	0	1	1	1	0	0	1	1	0	0	0	1	0	0	1	1	0	0	1	0	1	1	1	1	0	1	1	1	1	1	1	1	1	1	1	1	1	1	1	0	1
BC002559.1	IOH4053	YTH domain family, member 2 (YTHDF2)	3549.09	0.77193	44	0	0	1	0	1	1	1	0	1	1	0	0	1	1	1	0	0	1	1	0	0	1	0	0	1	1	1	1	1	1	1	1	1	1	1	1	1	1	1	1	1	1	1	1
NM_007080.1	IOH10074	LSM6 homolog, U6 small nuclear RNA associated (S. cerevisiae) (LSM6)	3547.01	0.684211	39	0	0	0	1	1	1	1	1	0	1	0	0	1	1	1	0	0	1	0	0	0	1	0	1	1	1	1	0	1	1	1	1	1	0	1	1	1	0	1	1	1	0	1	1
NM_020467.2	IOH3994	small trans-membrane and glycosylated protein (LOC57228), transcript variant 2	3546.04	0.684211	39	0	0	0	1	1	1	0	1	0	1	1	1	1	1	1	0	0	1	1	0	0	1	0	1	1	1	0	0	1	1	1	1	1	1	0	0	1	0	1	1	1	1	1	1
NM_022101.1	IOH27781	chromosome X open reading frame 56 (CXorf56)	3540.98	0.754386	43	0	0	1	0	0	1	1	1	0	1	1	0	1	1	1	1	0	1	1	0	0	1	0	1	1	1	1	0	1	1	1	1	1	0	1	1	1	1	1	1	1	1	1	1
BC050377.1	IOH26671	Serine/threonine-protein kinase PAK 1	3538.97	0.684211	39	0	0	1	0	1	1	1	1	1	1	1	0	1	1	1	0	0	1	0	0	0	1	0	1	0	1	1	0	1	1	1	0	0	1	1	1	1	1	1	1	1	1	1	0
BC051885.1	IOH27082	chromosome 14 open reading frame 106 (C14orf106)	3532.68	0.666667	38	0	0	0	0	1	0	1	1	0	1	1	0	1	1	1	0	0	1	1	0	0	1	0	1	1	1	1	0	1	1	1	0	1	0	1	0	1	1	1	1	1	1	1	1
NM_004922.2	IOH38664	SEC24 related gene family, member C (S. cerevisiae) (SEC24C), transcript variant 1	3501.27	0.736842	42	0	0	1	0	0	1	1	0	1	1	1	0	0	1	1	0	0	1	1	0	0	0	0	1	1	1	1	0	1	1	1	1	1	1	1	1	1	1	1	1	1	1	1	1
BC030711.2	IOH22414	Aprataxin and PNK-like factor	3498.3	0.649123	37	0	0	1	0	1	1	1	0	1	1	0	0	0	1	1	1	0	1	0	0	0	1	0	1	1	0	0	0	1	1	1	1	1	1	1	1	1	0	0	1	1	0	1	1
NM_005825.2	IOH39691	RAS guanyl releasing protein 2 (calcium and DAG-regulated) (RASGRP2), transcript variant 1	3497.88	0.701754	40	0	0	0	0	1	1	1	1	0	0	0	0	0	1	1	0	0	1	0	0	0	1	0	1	1	1	1	1	1	1	1	1	1	0	1	1	1	1	1	1	1	1	1	1
BC019039.2	IOH46089	Regulator of G-protein signaling 3	3495.85	0.684211	39	0	0	0	0	0	1	1	0	0	1	1	0	1	1	1	0	0	1	1	0	0	0	0	1	1	1	1	0	1	1	0	1	1	1	1	1	1	0	1	1	1	1	1	1
BC099658.1	IOH63280	Oral-facial-digital syndrome 1 protein (Protein 71-7A) [Source:UniProtKB/Swiss-Prot;Acc:O75665]	3495.32	0.719298	41	0	0	0	0	1	1	1	1	0	1	0	0	1	1	1	0	0	1	0	0	0	1	0	1	1	1	1	0	1	1	1	1	1	1	0	1	1	1	1	1	1	1	1	1
NM_005565.2	IOH11014	lymphocyte cytosolic protein 2 (SH2 domain containing leukocyte protein of 76kDa) (LCP2)	3495.25	0.754386	43	0	0	1	0	1	1	1	1	0	1	0	1	1	1	1	0	0	1	1	0	0	1	0	1	0	1	1	1	1	1	1	1	1	0	1	1	1	0	1	1	1	1	1	1
BC014975.1	IOH14285	family with sequence similarity 136, member A (FAM136A)	3494.17	0.701754	40	0	0	1	0	1	1	0	1	1	1	0	0	1	1	0	0	0	1	1	0	0	1	0	1	1	1	1	0	1	1	1	1	0	1	1	1	1	0	1	1	1	0	1	1
BC018764.1	IOH13523	KIAA1217 (KIAA1217)	3493.18	0.789474	45	0	0	1	0	1	1	1	1	1	1	1	0	0	1	1	0	0	1	1	0	0	1	0	1	1	1	1	1	1	1	1	1	1	1	1	1	1	1	1	1	1	1	1	1
NM_182612.1	IOH42453	Parkinson disease 7 domain containing 1 (PDDC1)	3493.07	0.842105	48	0	0	1	0	1	1	1	1	0	1	1	0	1	1	1	1	0	1	1	0	0	1	0	1	1	1	1	1	1	1	1	1	1	1	1	1	1	1	1	1	1	1	1	1
NM_138730.1	IOH9857	high mobility group nucleosomal binding domain 3 (HMGN3), transcript variant 2	3479.41	0.736842	42	0	0	1	0	1	1	1	1	1	1	0	0	1	1	1	0	0	1	1	0	0	1	0	0	1	1	1	0	1	1	1	1	1	0	1	1	1	1	1	1	1	0	1	1
BC017918.1	IOH12709	chromosome 9 open reading frame 19 (C9orf19)	3479.24	0.754386	43	0	0	0	0	1	1	1	1	0	1	1	0	1	1	0	1	0	1	1	0	0	1	0	1	1	1	1	0	1	1	1	1	1	1	1	1	1	1	1	1	1	1	0	1
NM_002898.1	IOH11398	RNA binding motif, single stranded interacting protein 2 (RBMS2)	3471.25	0.736842	42	0	0	1	0	1	1	1	1	0	0	0	0	1	1	1	0	0	1	1	0	0	1	0	1	1	1	1	0	1	1	1	0	1	1	1	1	1	1	1	1	1	1	1	1
NM_014716.2	IOH60017	ARFGAP with coiled-coil, ANK repeat and PH domain-containing protein 1	3466.66	0.701754	40	0	0	1	0	1	0	1	1	1	1	0	0	1	1	1	0	0	1	1	0	0	1	0	1	1	1	1	0	0	1	1	1	0	1	1	1	1	1	1	1	1	1	1	1
NM_153645.1	IOH11663	nucleoporin 50kDa (NUP50), transcript variant 3	3457.26	0.719298	41	0	0	1	0	1	1	0	0	1	1	0	0	1	1	1	1	0	1	0	0	0	1	0	1	1	1	1	0	1	1	1	1	0	1	1	1	1	1	1	1	1	1	1	1
NM_170676.2	IOH26710	Meis homeobox 2 (MEIS2), transcript variant d	3446.93	0.736842	42	0	0	1	0	1	1	1	1	1	0	1	0	1	1	1	1	0	1	1	0	0	1	0	1	1	1	1	0	1	1	1	1	0	1	0	1	1	0	1	0	1	1	1	0
NM_017451.1	IOH42068	BAI1-associated protein 2 (BAIAP2), transcript variant 2	3442.07	0.719298	41	0	0	1	1	1	1	1	1	1	1	1	0	1	1	1	1	0	1	0	0	0	1	0	1	1	1	1	0	1	1	0	1	1	0	1	0	1	1	1	1	1	1	1	1
NM_032140.1	IOH6250	chromosome 16 open reading frame 48 (C16orf48)	3437.11	0.719298	41	0	0	1	0	1	1	1	1	1	1	1	0	1	1	1	0	0	0	1	0	0	1	0	1	1	1	1	0	1	1	1	1	0	1	1	1	1	1	0	1	1	1	1	1
NM_004838.2	IOH12410	homer homolog 3 (Drosophila) (HOMER3)	3435.26	0.754386	43	0	0	0	0	0	0	1	1	0	1	1	0	1	1	1	1	0	1	1	0	0	1	0	1	1	1	1	1	1	1	1	1	1	1	1	1	1	1	1	1	1	1	1	1
NM_000723.3	IOH39502	calcium channel, voltage-dependent, beta 1 subunit (CACNB1), transcript variant 1	3433.23	0.701754	40	0	0	0	0	1	1	1	1	0	1	0	0	1	1	1	0	0	1	1	0	0	1	0	1	0	1	1	0	1	1	1	1	1	1	1	1	1	0	1	1	1	1	1	1
NM_181714.1	IOH26433	Leber congenital amaurosis 5 (LCA5)	3417.46	0.77193	44	0	0	1	0	1	1	1	1	1	1	1	0	1	1	1	0	0	1	0	0	0	1	0	1	1	1	0	1	1	1	1	1	1	1	1	1	1	0	1	1	1	1	1	1
NM_003161.1	IOH29907	ribosomal protein S6 kinase, 70kDa, polypeptide 1 (RPS6KB1)	3412.9	0.719298	41	0	0	1	0	1	1	1	1	1	1	1	0	1	1	1	1	0	1	0	0	0	1	0	1	1	1	0	0	0	1	1	1	1	1	1	0	1	1	1	1	1	1	1	1
BC008902.2	IOH46064	GRIP and coiled-coil domain-containing protein 1	3404.45	0.719298	41	0	0	1	0	1	1	1	0	1	1	0	0	1	1	1	1	0	1	1	0	0	1	0	1	1	1	1	0	1	1	1	1	1	1	0	1	1	0	0	1	1	1	1	1
BC011804.2	IOH14438	chromosome 1 open reading frame 165 (C1orf165)	3401.96	0.719298	41	0	0	1	0	1	1	1	1	0	0	1	0	1	1	1	1	0	1	1	0	0	1	0	1	1	1	1	0	1	1	1	1	1	0	1	0	1	0	1	1	1	1	1	1
BC050551.1	IOH26948	BCL2-associated athanogene 5 (BAG5)	3401.46	0.649123	37	0	0	1	0	1	1	1	0	1	0	1	0	1	1	1	1	0	1	1	0	0	0	0	1	1	1	1	0	1	1	0	1	0	1	1	0	1	0	1	0	1	0	1	1
BC035021.1	IOH27103	membrane-associated ring finger (C3HC4) 10 (RNF190)	3396.64	0.736842	42	0	0	1	0	1	1	1	0	1	1	0	1	1	1	1	1	0	1	0	0	0	1	0	0	0	1	1	1	1	1	1	1	1	1	1	1	1	0	1	1	0	1	1	1
NM_022337.1	IOH10104	RAB38, member RAS oncogene family (RAB38)	3388.56	0.631579	36	0	0	0	0	1	1	1	0	0	0	0	0	1	1	1	0	0	1	1	0	0	1	0	1	0	1	1	0	1	1	1	1	1	0	1	1	1	0	1	1	1	1	1	1
BC033708.1	IOH21753	Ral GEF with PH domain and SH3 binding motif 1 (RALGPS1)	3379.04	0.807018	46	0	0	0	0	1	1	1	1	1	1	1	0	1	1	1	1	0	1	1	0	0	1	0	1	1	1	1	1	1	1	1	1	1	0	1	1	1	1	1	1	1	1	1	1
NM_002861.1	IOH3644	phosphate cytidylyltransferase 2, ethanolamine (PCYT2)	3375.32	0.649123	37	0	0	0	0	1	1	1	1	0	0	1	0	1	1	0	0	0	1	0	0	0	1	0	1	0	1	1	0	1	1	1	1	1	1	1	1	1	0	0	1	0	1	1	1
BC020726.1	IOH12969	sciellin (SCEL)	3374.37	0.684211	39	0	0	1	0	1	1	1	1	0	1	1	0	1	1	1	0	0	1	1	0	0	1	0	1	1	1	1	0	1	1	1	1	0	1	1	1	1	1	1	1	1	0	1	1
NM_016310.2	IOH12571	polymerase (RNA) III (DNA directed) polypeptide K, 12.3 kDa (POLR3K)	3370.47	0.649123	37	0	0	1	0	0	0	0	1	1	1	0	0	1	0	1	0	0	0	1	0	0	1	0	1	1	1	1	0	1	1	1	1	1	1	1	1	1	1	1	1	1	1	1	1
NM_173822.1	IOH27491	family with sequence similarity 126, member B (FAM126B)	3355.32	0.77193	44	0	0	1	0	1	1	1	1	1	1	0	0	1	1	1	0	0	1	1	0	0	1	0	1	1	1	1	0	1	1	1	1	1	0	1	1	1	1	1	1	1	1	1	1
BC032124.1	IOH23093	bromodomain containing 3 (BRD3)	3345.92	0.701754	40	0	0	0	0	1	0	1	0	0	1	0	0	1	1	1	0	0	1	1	0	0	1	0	1	1	1	1	0	1	1	1	1	1	1	1	0	1	1	1	1	1	1	1	1
BC052805.1	IOH29378	erythrocyte membrane protein band 4.9 (dematin) (EPB49)	3344.87	0.736842	42	0	0	0	1	1	1	1	1	0	1	1	0	1	1	1	0	0	1	0	0	0	1	0	1	0	1	1	1	1	1	1	1	1	0	1	1	1	1	1	1	1	1	1	1
BC039832.1	IOH26274	periphilin 1 (PPHLN1)	3339.39	0.719298	41	0	0	1	0	1	0	1	0	1	1	1	0	1	1	1	0	0	1	0	0	0	1	0	1	1	1	1	0	1	1	1	1	1	1	1	1	1	1	1	1	1	1	0	1
NM_152653.1	IOH13176	ubiquitin-conjugating enzyme E2E 2 (UBC4/5 homolog, yeast) (UBE2E2)	3335.49	0.666667	38	0	0	0	0	1	1	1	1	0	0	0	0	1	1	1	0	0	1	1	0	0	1	0	1	0	1	1	0	1	1	1	1	1	1	1	0	1	1	1	1	1	1	1	1
BC000306.1	IOH3456	hydroxyacyl-Coenzyme A dehydrogenase (HADH)	3334.91	0.754386	43	0	0	1	0	1	0	1	0	0	1	0	0	1	1	1	1	0	1	1	0	0	1	0	1	1	1	1	0	1	1	1	1	1	1	1	1	1	1	1	1	1	1	1	1
BC021187.1	IOH10893	DKFZP434K028 protein (DKFZP434K028)	3332.35	0.807018	46	0	0	0	0	1	1	1	1	0	1	1	0	1	1	1	1	0	1	1	0	0	1	0	1	1	1	1	0	1	1	1	1	1	1	1	1	1	1	1	1	1	1	1	1
BC017789.1	IOH13662	cysteine and histidine-rich domain (CHORD)-containing 1 (CHORDC1)	3332.29	0.684211	39	0	0	1	0	1	1	1	0	1	1	0	0	1	1	1	0	0	1	1	0	0	1	0	1	1	1	0	0	1	1	0	1	1	0	1	0	1	1	1	1	1	1	0	1
BC066938.1	IOH40083	DEAD (Asp-Glu-Ala-Asp) box polypeptide 43 (DDX43)	3328.1	0.719298	41	0	0	0	0	1	1	1	0	0	1	1	0	0	1	1	0	0	1	1	0	0	1	0	1	1	1	1	0	1	1	1	1	1	1	1	1	1	1	1	1	1	1	1	1
BC014298.1	IOH13449	PRKR interacting protein 1 (IL11 inducible) (PRKRIP1)	3324.04	0.701754	40	0	0	0	0	1	1	1	1	0	1	1	0	1	1	1	0	0	1	1	0	0	1	0	1	1	1	1	0	1	1	1	1	1	0	1	1	1	0	1	1	1	1	1	1
BC038976.1	IOH28763	Rho GTPase-activating protein 15	3321.48	0.719298	41	0	0	0	0	1	1	0	1	0	1	1	0	1	0	1	0	0	1	0	0	0	1	0	1	1	1	1	0	1	1	1	1	1	1	1	1	1	1	1	1	1	1	1	1
NM_022156.3	IOH39856	dihydrouridine synthase 1-like (S. cerevisiae) (DUS1L)	3302.53	0.736842	42	0	0	0	0	1	1	1	1	0	1	1	0	1	1	1	0	0	1	1	0	0	1	0	1	1	1	1	0	0	1	1	1	1	0	1	1	1	1	1	1	1	1	1	1
NM_175887.2	IOH27336	proline rich 15 (PRR15)	3300.25	0.701754	40	0	0	0	0	1	1	1	0	0	1	0	0	1	1	1	0	0	1	1	0	0	1	0	1	1	1	1	0	1	1	1	1	1	0	1	1	1	0	1	1	1	1	1	1
NM_006621.3	IOH41131	S-adenosylhomocysteine hydrolase-like 1 (AHCYL1)	3292.94	0.719298	41	0	0	1	0	1	1	1	1	1	1	0	0	1	1	0	0	0	0	1	0	0	1	0	0	1	1	1	1	1	1	1	1	1	1	1	1	1	1	1	1	1	1	0	1
BC012472.1	IOH11069	ubiquitin D (UBD)	3292.25	0.701754	40	0	0	1	1	1	1	1	0	1	1	0	0	1	1	1	0	0	1	0	0	0	0	0	1	1	1	1	1	0	1	1	1	0	1	1	1	1	1	1	1	1	1	0	1
NM_001040633.1	IOH61663	protein kinase, AMP-activated, gamma 2 non-catalytic subunit (PRKAG2), transcript variant c, mRNA.	3288.13	0.684211	39	0	0	0	0	1	1	1	0	0	0	0	0	1	1	0	0	0	1	0	0	0	0	0	0	1	1	1	1	1	1	1	1	1	1	1	1	1	1	1	1	1	1	1	1
BC042864.1	IOH26525	SH3-domain GRB2-like 3 (SH3GL3)	3284.36	0.666667	38	0	0	0	0	1	0	0	1	0	1	1	0	0	1	1	1	0	1	1	0	0	1	0	1	1	1	1	0	1	1	1	0	0	0	1	1	1	0	1	1	1	1	1	1
BC064700.1	IOH39815	estrogen-related receptor gamma (ESRRG)	3282.34	0.631579	36	0	0	0	0	1	0	1	0	0	1	0	0	1	1	1	0	0	1	1	0	0	1	0	1	1	1	0	0	1	1	0	1	1	1	1	0	1	1	1	1	1	0	0	1
NM_016303.1	IOH27824	WW domain binding protein 5 (WBP5), transcript variant 1	3275.5	0.649123	37	0	0	1	0	1	0	0	0	1	1	1	0	1	0	0	0	0	1	0	0	0	1	0	1	1	1	1	0	0	1	1	1	1	1	1	0	1	1	1	0	1	1	1	1
BC012997.2	IOH12554	sulfatase 1 (SULF1)	3274.34	0.701754	40	0	0	0	1	1	1	1	0	0	1	1	0	0	0	1	0	0	1	1	0	0	1	0	0	1	1	1	0	1	1	1	1	0	1	1	1	1	1	1	1	1	1	1	1
NM_017819.1	IOH45746	RNA (guanine-9-)-methyltransferase domain-containing protein 1, mitochondrial	3268.21	0.719298	41	0	0	0	0	1	1	1	0	0	0	1	0	1	1	1	0	0	1	1	0	0	1	0	1	1	1	1	0	1	1	1	1	1	0	1	1	1	1	1	1	1	1	1	1
NM_032207.1	IOH52563	Uncharacterized protein C19orf44	3264.4	0.684211	39	0	0	0	0	1	1	1	1	0	1	0	0	1	1	1	1	0	1	1	0	0	1	0	1	1	1	0	0	1	1	1	1	1	0	1	0	1	1	1	1	0	1	1	1
BC000758.1	IOH3735	Coiled-coil domain-containing protein 28A	3263.97	0.666667	38	0	0	0	0	1	1	1	0	0	1	1	0	1	1	0	0	0	1	1	0	0	1	0	1	1	1	0	0	1	1	1	1	1	0	1	1	1	0	1	1	1	1	1	1
BC032825.2	IOH26816	SH3-domain GRB2-like 2 (SH3GL2)	3263.94	0.631579	36	0	0	0	0	1	1	1	1	0	0	0	0	0	1	1	1	0	1	1	0	0	0	0	1	1	1	1	0	0	0	1	1	1	1	1	0	1	1	1	0	1	1	1	1
NM_014466.2	IOH27569	tektin 2 (testicular) (TEKT2)	3251.04	0.701754	40	0	0	0	0	1	1	1	0	1	0	0	0	1	1	1	0	0	1	1	0	0	1	0	1	0	1	1	0	1	1	1	1	1	0	1	1	1	1	1	1	1	1	1	1
NM_005641.2	IOH11381	TAF6 RNA polymerase II, TATA box binding protein (TBP)-associated factor, 80kDa (TAF6), transcript variant 1	3249.78	0.754386	43	0	0	1	0	1	1	1	0	0	1	1	0	1	1	1	1	0	1	0	0	0	1	0	1	1	1	1	1	1	1	1	0	1	0	1	1	1	1	1	1	1	1	1	1
BC064984.1	IOH40665	additional sex combs like 1 (Drosophila) (ASXL1)	3241.52	0.631579	36	0	0	0	0	1	1	0	1	0	1	0	0	1	1	1	0	0	1	1	0	0	0	0	1	1	1	0	0	1	1	0	1	1	1	0	0	1	0	1	1	1	1	1	1
NM_012121.4	IOH45907	CDC42 effector protein (Rho GTPase binding) 4 (CDC42EP4)	3239.93	0.719298	41	0	0	1	0	1	1	1	0	1	1	1	0	1	1	1	0	0	1	1	0	0	1	0	1	1	1	1	0	1	1	1	0	0	1	1	1	1	0	1	1	1	0	1	1
BC011399.1		spleen tyrosine kinase (SYK)	3237.43	0.807018	46	0	0	1	0	1	1	1	0	1	1	1	0	1	1	1	0	0	1	1	0	0	1	0	1	1	1	1	1	1	1	1	1	1	0	1	1	1	1	1	1	1	1	1	1
NM_007373.2	IOH26711	soc-2 suppressor of clear homolog (C. elegans) (SHOC2)	3228.63	0.649123	37	0	0	0	0	0	1	1	0	0	0	0	0	1	1	0	0	0	1	1	0	0	0	0	1	1	1	1	1	1	1	1	1	1	1	0	1	1	1	1	1	1	1	1	1
NM_198216.1	IOH44674	small nuclear ribonucleoprotein polypeptides B and B1 (SNRPB), transcript variant 1, mRNA.	3224.08	0.77193	44	0	0	1	0	1	1	1	1	0	1	1	1	1	1	1	0	0	1	1	0	0	1	0	1	1	1	1	0	0	1	1	1	1	1	1	1	1	0	1	1	1	1	1	1
NM_145245.1	IOH12245	ecotropic viral integration site 5-like (EVI5L)	3223.02	0.666667	38	0	0	1	0	1	1	1	0	1	1	0	0	1	1	1	0	0	1	1	0	0	1	0	1	1	1	0	0	0	1	0	1	1	0	1	1	1	0	1	1	1	1	1	0
BC004876.1	IOH5626	Protein MCM10 homolog	3213.97	0.77193	44	0	0	0	0	1	1	1	1	0	1	1	0	1	1	1	0	0	1	1	0	0	1	0	1	1	1	1	0	1	1	1	1	1	1	1	1	1	1	1	1	1	1	1	1
NM_002822.1	IOH25866	Twinfilin-1	3206.15	0.631579	36	0	0	0	0	1	1	1	1	0	1	1	0	1	1	0	1	0	1	0	0	0	1	0	1	1	1	1	0	1	1	0	1	1	0	1	1	1	0	1	1	1	1	1	1
NM_032883.1	IOH6975	TOX high mobility group box family member 2 (TOX2), transcript variant 3	3200.68	0.631579	36	0	0	0	0	1	1	1	1	0	1	1	0	1	1	1	1	0	1	1	0	0	1	0	1	1	1	0	0	1	0	0	1	0	1	1	1	0	1	0	0	1	1	1	1
BC094800.1	IOH62619	Jouberin	3199.04	0.719298	41	0	0	1	0	1	1	1	1	1	0	1	0	1	1	1	0	0	1	0	0	0	1	0	1	0	1	1	0	1	1	1	1	1	1	1	1	1	0	1	1	0	1	1	1
NM_004873.1	IOH26366	BCL2-associated athanogene 5 (BAG5), transcript variant 2	3194.12	0.719298	41	0	0	1	0	1	1	1	1	1	1	1	0	0	1	1	1	0	1	0	0	0	1	0	1	0	1	1	0	1	1	1	1	1	1	1	1	1	0	1	1	1	1	1	1
NM_000983.3	IOH58958	60S ribosomal protein L22	3186.96	0.666667	38	0	0	0	0	1	1	1	1	0	1	0	0	0	1	1	0	0	1	1	0	0	1	0	0	1	1	1	0	1	1	1	1	1	0	1	1	1	0	1	1	1	0	1	1
NM_017588.1	IOH4895	WD repeat domain 5 (WDR5), transcript variant 1	3185.53	0.666667	38	0	0	1	0	1	1	1	0	0	1	1	0	1	1	1	0	0	1	1	0	0	1	0	1	1	1	0	0	1	1	0	1	1	0	1	1	1	0	1	1	1	0	1	1
BC022270.1	IOH12872	CDKN2A interacting protein (CDKN2AIP)	3184.99	0.736842	42	0	0	0	0	1	1	1	1	0	1	0	0	1	1	1	0	0	1	1	0	0	0	0	1	1	1	1	0	1	1	1	1	1	1	1	1	1	1	1	1	1	1	1	1
BC054004.1	IOH29012	septin 9 (SEPT9)	3183.4	0.614035	35	1	0	0	0	1	1	1	0	0	1	1	0	0	1	1	0	0	1	1	0	0	1	0	1	0	1	1	0	0	1	1	1	0	0	1	0	1	0	0	1	1	1	1	1
NM_024946.1	IOH10395	NEFA-interacting nuclear protein NIP30 (NIP30)	3182.48	0.649123	37	0	0	1	0	1	0	1	0	1	1	0	0	1	1	1	0	0	1	0	0	0	1	0	1	1	1	0	0	1	1	1	1	1	1	1	0	1	1	1	1	1	1	0	1
NM_144594.1	IOH10942	family with sequence similarity 112, member B (FAM112B)	3180.77	0.736842	42	0	0	1	1	1	1	1	0	0	0	1	0	1	1	1	1	0	1	1	0	0	1	0	1	1	1	1	0	1	1	0	1	1	1	1	0	1	1	1	1	1	1	0	1
BC006083.1	IOH6556	tyrosyl-DNA phosphodiesterase 1 (TDP1)	3177.67	0.736842	42	0	0	1	0	1	0	1	1	0	1	0	0	1	1	1	0	0	1	1	0	0	0	0	1	1	1	1	0	1	1	1	1	1	0	1	1	1	1	1	1	1	1	1	1
NM_032905.3	IOH56977	Splicing factor 45	3175.68	0.614035	35	0	0	0	1	1	0	1	1	0	1	1	0	1	1	1	0	0	1	0	1	0	1	0	0	1	1	0	0	1	1	1	0	1	0	1	0	1	1	1	1	0	0	1	1
NM_032858.1	IOH12001	maelstrom homolog (Drosophila) (MAEL)	3167.23	0.719298	41	0	0	0	0	1	1	1	0	0	1	1	0	1	1	0	0	0	1	0	0	0	1	0	1	1	1	1	0	1	1	1	1	1	0	1	1	1	1	1	1	1	1	1	1
BC031231.1	IOH27515	serine/threonine kinase 33 (STK33)	3164.71	0.77193	44	0	0	1	0	1	1	1	1	1	1	1	0	1	0	1	0	0	1	1	0	0	1	0	1	1	1	1	1	1	1	1	1	0	1	1	1	1	0	1	1	1	1	1	1
NM_130807.1	IOH10112	MOB1, Mps One Binder kinase activator-like 2A (yeast) (MOBKL2A)	3162.23	0.684211	39	0	0	1	0	1	1	1	0	1	0	1	0	0	1	0	0	0	1	0	0	0	1	0	1	1	1	1	0	1	1	1	1	1	0	1	1	1	1	1	1	1	1	1	0
PV4395		Serine/threonine-protein kinase MARK1	3160.7	0.701754	40	0	0	1	0	1	1	1	0	0	1	1	0	1	1	1	0	0	1	0	0	0	1	0	1	1	1	1	0	1	1	1	1	0	1	1	1	1	0	1	1	1	1	1	1
BC036184.1	IOH62166	Tropomodulin-2	3158.03	0.684211	39	0	1	1	0	1	0	1	1	0	1	0	0	1	1	1	0	0	1	1	0	0	1	0	1	1	1	0	0	1	1	0	1	1	0	1	0	1	1	1	0	1	1	1	1
NM_001641.2	IOH5081	APEX nuclease (multifunctional DNA repair enzyme) 1 (APEX1), transcript variant 1	3157.68	0.614035	35	0	0	0	0	1	1	1	0	0	1	1	0	1	1	1	0	0	1	1	0	0	1	0	1	0	1	0	0	1	0	0	1	1	1	0	0	1	0	1	1	1	0	1	1
BC033088.1	IOH23217	lamin A/C (LMNA)	3155.89	0.701754	40	0	0	0	0	1	1	1	0	0	0	1	0	0	1	1	1	0	1	1	0	0	1	0	1	1	1	1	0	1	1	1	1	1	1	1	0	1	1	1	1	0	1	1	1
PV3851		MAP/microtubule affinity-regulating kinase 4	3151.72	0.614035	35	0	0	1	0	1	0	1	0	0	1	1	0	0	0	1	0	0	1	0	0	0	1	0	1	0	1	1	0	1	1	1	1	1	1	1	1	1	0	0	1	0	1	1	1
BC065525.1	IOH40477	adducin 2 (beta) (ADD2)	3145.56	0.614035	35	0	0	1	0	1	1	1	1	1	1	1	0	0	1	1	0	0	1	1	0	0	1	0	1	1	1	0	1	0	1	0	1	1	0	1	1	1	0	1	1	0	1	1	1
BC001662.1		MAP kinase-activated protein kinase 3	3131.06	0.649123	37	0	0	0	0	1	1	1	0	0	1	0	0	1	1	1	0	0	1	0	0	0	0	0	0	1	1	1	0	1	1	1	1	1	1	0	1	1	1	1	1	1	1	1	1
NM_022787.2	IOH13215	nicotinamide nucleotide adenylyltransferase 1 (NMNAT1)	3130.75	0.77193	44	0	0	1	0	1	1	0	1	1	1	1	0	1	1	1	1	0	1	1	0	0	1	0	1	0	1	1	0	1	1	1	1	1	1	1	1	1	1	1	1	1	1	1	1
NM_078630.1	IOH37755	male-specific lethal 3-like 1 (Drosophila) (MSL3L1), transcript variant 2	3128.61	0.614035	35	0	0	1	0	0	1	1	0	1	0	0	0	1	1	1	0	0	1	0	0	0	1	0	0	1	1	1	0	0	1	1	1	1	1	1	1	1	1	1	1	1	1	1	1
BC092404.1	IOH62574	Rap guanine nucleotide exchange factor 3	3125.33	0.719298	41	0	0	0	0	1	0	1	0	0	1	1	0	1	1	1	1	0	1	0	0	0	0	0	1	1	1	1	1	1	1	1	1	1	1	1	1	1	0	1	1	1	1	1	1
XM_375456.2	IOH43380	Ataxin-7-like protein 3	3122.1	0.666667	38	0	1	1	0	1	0	1	0	0	1	1	0	1	1	1	0	0	1	1	0	0	1	0	1	1	1	1	0	1	1	1	0	1	0	1	0	1	0	1	1	1	1	1	1
NM_001005360.1	IOH53617	Dynamin-2	3121.83	0.736842	42	0	0	1	0	1	1	1	0	1	1	1	0	0	1	1	0	0	1	1	0	0	1	0	1	1	1	1	0	1	1	1	1	0	0	1	1	1	1	1	1	1	1	1	1
BC008744.2	IOH40663	Pleckstrin homology domain-containing family O member 2	3110.64	0.649123	37	0	0	0	0	1	1	1	1	0	1	1	0	1	1	1	0	0	1	0	0	0	1	0	0	1	1	1	0	1	1	1	1	0	1	1	1	1	0	1	1	1	0	1	1
NM_002254.5	IOH42589	kinesin family member 3C (KIF3C)	3109.29	0.719298	41	0	0	1	0	1	1	0	0	1	1	1	0	1	1	1	1	0	1	0	0	0	1	0	1	1	1	1	0	1	1	1	1	1	1	1	0	1	0	1	1	0	1	1	1
NM_003503.2		Cell division cycle 7-related protein kinase	3107.95	0.754386	43	0	0	1	0	1	1	1	0	0	1	1	0	1	1	1	0	0	1	1	0	0	1	0	1	1	1	1	0	1	1	1	1	1	0	1	1	1	1	1	1	1	1	1	1
NM_016364.2	IOH12214	dual specificity phosphatase 13 (DUSP13), transcript variant 6	3102.66	0.684211	39	0	0	0	0	1	1	1	1	0	1	0	0	1	1	1	0	0	1	0	0	0	1	0	0	0	1	1	0	1	1	1	1	1	1	1	1	1	0	1	1	0	1	1	1
BC016609.1	IOH11216	cytidine monophosphate N-acetylneuraminic acid synthetase (CMAS)	3095.03	0.807018	46	0	0	1	0	1	1	1	1	1	1	1	0	1	1	1	1	0	1	1	0	0	1	0	1	1	1	1	0	1	1	1	1	0	1	1	1	1	1	1	1	1	1	1	1
NM_007054.1	IOH26900	kinesin family member 3A (KIF3A)	3094.95	0.719298	41	0	0	0	0	1	1	1	1	0	0	0	0	1	1	1	0	0	1	1	0	0	1	0	1	1	1	1	0	1	1	1	1	1	1	1	1	1	1	1	1	1	1	1	1
NM_032752.1	IOH6862	zinc finger protein 496 (ZNF496)	3094.39	0.631579	36	1	0	1	0	1	0	1	0	0	1	0	0	1	1	0	0	0	1	0	0	0	1	0	1	1	1	0	0	1	1	0	1	1	0	1	1	1	1	1	0	1	1	1	1
NM_001004306.1	IOH40085	similar to hypothetical protein FLJ36492 (MGC87631)	3088.75	0.754386	43	0	0	0	0	1	1	1	1	1	1	0	0	1	1	1	0	0	1	0	0	0	1	0	1	1	1	1	0	1	1	1	1	1	1	1	1	1	1	1	1	1	1	1	1
BC033758.1	IOH21879	centaurin, alpha 2 (CENTA2)	3085.37	0.684211	39	0	0	0	0	1	1	1	1	0	1	0	0	1	1	1	0	0	1	1	0	0	1	0	1	1	1	0	0	1	1	1	1	1	0	1	1	1	1	1	1	1	0	1	1
BC009820.2	IOH12615	chromosome 11 open reading frame 63 (C11orf63)	3077.99	0.649123	37	0	0	0	0	1	1	0	1	0	1	1	0	1	0	1	0	0	0	0	0	0	1	0	1	1	1	1	0	1	1	1	1	0	1	1	1	1	0	1	1	1	1	1	1
NM_012117.1	IOH3162	chromobox homolog 5 (HP1 alpha homolog, Drosophila) (CBX5)	3076.07	0.754386	43	0	0	1	1	1	1	1	0	0	1	1	0	1	1	1	0	0	1	1	0	0	1	0	1	1	1	1	0	1	1	1	1	1	0	1	1	1	0	1	1	1	1	1	1
NM_138779.1	IOH10711	chromosome 13 open reading frame 27 (C13orf27)	3068.13	0.684211	39	0	0	1	0	1	1	1	0	0	1	1	0	1	1	1	0	0	1	1	0	0	1	0	1	0	1	0	0	1	1	0	1	1	1	0	1	1	0	1	1	1	1	1	1
BC004259.1	IOH5453	chromosome 14 open reading frame 140 (C14orf140)	3065.53	0.736842	42	0	0	1	0	1	1	1	1	1	0	0	0	1	1	1	0	0	1	0	0	0	1	0	1	1	1	1	0	1	1	1	1	1	1	1	1	1	1	1	1	1	1	1	1
NM_003910.2	IOH23209	BUD31 homolog (S. cerevisiae) (BUD31)	3064.04	0.684211	39	0	0	0	0	1	0	1	1	0	1	0	1	1	1	1	1	0	1	0	0	0	1	0	1	1	1	1	0	1	1	1	1	1	0	1	1	1	0	1	1	1	1	1	1
BC036099.1	IOH27225	aryl-hydrocarbon receptor nuclear translocator 2 (ARNT2)	3060.42	0.77193	44	0	0	0	0	1	0	1	1	1	1	1	0	1	1	1	0	0	1	1	0	0	1	0	1	1	1	1	1	1	1	1	1	1	1	1	1	1	1	1	1	1	1	1	1
NM_015698.2	IOH3563	G patch domain and KOW motifs (GPKOW)	3048.37	0.719298	41	0	0	0	0	1	0	1	1	1	1	1	0	1	1	1	0	0	1	0	0	0	1	0	1	1	1	1	0	1	1	1	1	1	1	1	1	1	0	1	1	1	1	1	1
BC059174.1	IOH28851	TRAF3-interacting protein 1	3042.39	0.649123	37	0	0	1	0	1	0	1	1	0	1	1	0	1	1	0	1	0	1	0	0	0	1	0	1	1	0	1	0	1	1	1	0	1	1	1	1	1	0	1	1	1	1	1	1
NM_001381.2	IOH2343	docking protein 1, 62kDa (downstream of tyrosine kinase 1) (DOK1)	3035.12	0.754386	43	0	0	0	0	1	1	1	1	0	1	1	0	1	1	1	0	0	1	1	0	0	1	0	1	1	1	1	1	1	1	1	1	1	0	1	0	1	1	1	1	1	1	1	1
NM_153764.1	IOH45724	potassium inwardly-rectifying channel, subfamily J, member 1 (KCNJ1), transcript variant rom-k2	3031.5	0.77193	44	0	0	1	1	1	1	1	1	0	1	0	0	1	1	1	0	0	1	1	0	0	1	0	1	0	1	1	0	1	1	1	1	1	1	1	1	1	1	1	1	1	1	1	1
BC067085.1	IOH57304	Huntingtin-interacting protein 1-related protein	3030.45	0.77193	44	0	0	0	0	1	1	1	1	0	1	1	0	1	1	1	0	0	1	0	0	0	0	0	1	1	1	1	1	1	1	1	1	1	1	1	1	1	1	1	1	1	1	1	1
NM_006223.1	IOH7192	protein (peptidylprolyl cis/trans isomerase) NIMA-interacting, 4 (parvulin) (PIN4)	3020.02	0.649123	37	0	0	0	0	1	0	1	0	0	0	0	0	1	1	1	0	0	1	1	0	0	1	0	0	1	1	1	0	1	1	1	1	1	1	1	0	1	0	1	1	1	1	1	1
NM_022491.2	IOH62643	Sin3 histone deacetylase corepressor complex component SDS3	3016.22	0.649123	37	0	0	0	0	1	1	1	0	0	1	0	0	1	1	1	0	0	1	1	0	0	0	0	1	0	1	1	1	1	1	1	1	0	1	1	1	1	0	1	1	0	1	1	1
BC000633.1		Dual specificity protein kinase TTK	3005.21	0.736842	42	0	0	1	0	1	1	1	0	1	1	1	0	1	0	1	0	1	1	1	0	0	1	0	1	1	1	1	1	1	1	1	1	1	1	0	1	1	1	0	1	1	1	1	0
[truncated: 355 more columns]

## Sheet: Supplemental Table 1C
Database ID	Ultimate ORF ID	Description	Average RFU	Percent Positive	Total hits	File1 Hit	File2 Hit	File3 Hit	File4 Hit	File5 Hit	File6 Hit	File7 Hit	File8 Hit	File9 Hit	File10 Hit	File11 Hit	File12 Hit	File13 Hit	File14 Hit	File15 Hit	File16 Hit	File17 Hit	File18 Hit	File19 Hit	File20 Hit	File21 Hit	File22 Hit	File23 Hit	File24 Hit	File25 Hit	File26 Hit	File27 Hit	File28 Hit	File29 Hit	File30 Hit	File31 Hit	File32 Hit	File33 Hit	File34 Hit	File35 Hit	File36 Hit	File37 Hit	File38 Hit	File39 Hit	File40 Hit	File41 Hit	File42 Hit	File43 Hit	File44 Hit
NM_003141.2	IOH9948	tripartite motif-containing 21 (TRIM21)	62802.4	0.982456	56	1	1	1	1	1	1	1	1	1	1	1	1	1	1	1	1	1	1	1	1	1	1	0	1	1	1	1	1	1	1	1	1	1	1	1	1	1	1	1	1	1	1	1	1
BC030984.1	IOH23182	cDNA clone MGC:32654 IMAGE:4701898, complete cds	58491.9	0.982456	56	1	1	1	1	1	1	1	1	1	1	1	1	1	1	1	1	1	1	1	1	1	1	0	1	1	1	1	1	1	1	1	1	1	1	1	1	1	1	1	1	1	1	1	1
BC015833.1	IOH14840	cDNA clone MGC:27152 IMAGE:4691630, complete cds	57276.5	0.982456	56	1	1	1	1	1	1	1	1	1	1	1	1	1	1	1	1	1	1	1	1	1	1	0	1	1	1	1	1	1	1	1	1	1	1	1	1	1	1	1	1	1	1	1	1
PHR5001		Recombinant human CTLA-4/Fc	55636.4	0.982456	56	1	1	1	1	1	1	1	1	1	1	1	1	1	1	1	1	1	1	1	1	1	1	0	1	1	1	1	1	1	1	1	1	1	1	1	1	1	1	1	1	1	1	1	1
BC020233.1	IOH14752	cDNA clone MGC:31936 IMAGE:4765518, complete cds	54365.2	0.982456	56	1	1	1	1	1	1	1	1	1	1	1	1	1	1	1	1	1	1	1	1	1	1	0	1	1	1	1	1	1	1	1	1	1	1	1	1	1	1	1	1	1	1	1	1
BC016380.1	IOH23077	cDNA clone MGC:27376 IMAGE:4688477, complete cds	46863.7	0.982456	56	1	1	1	1	1	1	1	1	1	1	1	1	1	1	1	1	1	1	1	1	1	1	0	1	1	1	1	1	1	1	1	1	1	1	1	1	1	1	1	1	1	1	1	1
BC030813.1	IOH23055	cDNA clone MGC:22645 IMAGE:4700961, complete cds	44904.1	0.964912	55	1	1	1	1	1	1	1	1	1	1	1	1	1	1	1	1	1	1	1	1	1	1	0	1	1	1	1	1	1	1	1	1	1	1	1	1	1	1	1	1	1	1	1	1
NM_014481.2	IOH4887	APEX nuclease (apurinic/apyrimidinic endonuclease) 2 (APEX2), nuclear gene encoding mitochondrial protein	40442.3	0.947368	54	1	1	1	1	1	1	1	1	1	1	1	1	1	1	1	1	1	1	1	1	0	1	0	1	1	1	1	1	1	1	1	1	1	1	1	1	1	1	1	1	1	1	1	1
BC022362.1	IOH14191	cDNA clone MGC:23888 IMAGE:4704496, complete cds	30665.8	0.982456	56	1	1	1	1	1	1	1	1	1	1	1	1	1	1	1	1	1	1	1	1	1	1	0	1	1	1	1	1	1	1	1	1	1	1	1	1	1	1	1	1	1	1	1	1
NM_203284.1	IOH39978	recombination signal binding protein for immunoglobulin kappa J region (RBPJ), transcript variant 4	29880.2	0.964912	55	1	1	1	1	1	1	1	1	1	1	1	1	1	1	1	1	1	1	1	1	0	1	0	1	1	1	1	1	1	1	1	1	1	1	1	1	1	1	1	1	1	1	1	1
NM_024692.3	IOH42634	CAP-GLY domain containing linker protein family, member 4 (CLIP4)	26846.1	0.947368	54	1	1	1	1	1	1	1	1	1	1	1	1	1	1	1	1	1	1	1	0	0	1	0	1	1	1	1	1	1	1	1	1	1	1	1	1	1	1	1	1	1	1	1	1
BC018929.1	IOH22929	pleckstrin homology-like domain, family A, member 1 (PHLDA1)	21412.2	0.912281	52	0	1	1	1	1	1	1	1	1	1	1	1	1	1	1	1	0	1	1	1	0	1	0	1	1	1	1	1	1	1	1	1	1	1	0	1	1	1	1	1	1	1	1	1
BC032451.1	IOH21663	cDNA clone MGC:40426 IMAGE:5178085, complete cds	21277.8	0.964912	55	1	1	1	1	1	1	1	1	1	1	1	1	1	1	1	1	1	1	1	1	0	1	0	1	1	1	1	1	1	1	1	1	1	1	1	1	1	1	1	1	1	1	1	1
BC099907.1	IOH62625	General transcription factor II-I	18984.8	0.912281	52	1	0	1	1	1	1	1	1	1	1	1	1	1	1	1	1	0	1	1	0	0	1	0	1	1	1	1	1	1	1	1	1	1	1	1	1	1	1	1	1	1	1	1	1
NM_004987.3	IOH55033	LIM and senescent cell antigen-like-containing domain protein 1	18632.6	0.912281	52	1	1	1	1	1	1	1	1	1	1	1	1	1	1	1	1	0	1	1	0	0	1	0	1	1	1	1	1	1	1	1	1	1	1	0	1	1	1	1	1	1	1	1	1
BC031650.1	IOH22742	Putative E3 ubiquitin-protein ligase SH3RF2	17013.7	0.947368	54	1	1	1	1	1	1	1	1	1	1	1	1	1	1	1	1	0	1	1	1	0	1	0	1	1	1	1	1	1	1	1	1	1	1	1	1	1	1	1	1	1	1	1	1
BC014991.1	IOH12177	N-methylpurine-DNA glycosylase (MPG)	16755.4	0.929825	53	1	1	1	1	1	1	1	1	1	1	1	1	1	1	1	1	0	1	1	0	0	1	0	1	1	1	1	1	1	1	1	1	1	1	1	1	1	1	1	1	1	1	1	1
NM_012325.1	IOH41294	microtubule-associated protein, RP/EB family, member 1 (MAPRE1)	16440	0.859649	49	0	0	1	0	1	1	1	1	1	1	1	0	1	1	1	1	0	1	1	0	1	1	0	0	1	1	1	1	1	1	1	1	1	1	1	1	1	1	1	1	1	1	1	1
NM_002945.2	IOH11757	replication protein A1, 70kDa (RPA1)	15273.5	0.824561	47	0	1	1	0	1	1	1	0	1	1	1	0	1	1	1	1	0	0	1	0	0	1	0	1	1	1	1	1	1	1	1	1	1	1	1	1	1	1	1	1	1	1	1	1
BC025700.1	IOH11281	AF4/FMR2 family, member 4 (AFF4)	14887.5	0.877193	50	0	1	1	1	1	1	1	1	1	1	1	0	1	1	1	1	0	1	1	0	0	1	0	1	1	1	1	1	1	1	1	1	1	1	1	1	1	1	1	1	1	1	1	0
BC026346.1	IOH10816	family with sequence similarity 84, member A (FAM84A)	14879.9	0.894737	51	0	1	0	1	1	1	1	1	0	1	1	1	1	1	1	1	0	1	1	1	0	1	0	1	1	1	1	1	1	1	1	1	1	1	1	1	1	1	1	1	1	1	1	1
NM_032855.1	IOH14623	hematopoietic SH2 domain containing (HSH2D)	14574.3	0.964912	55	1	1	1	1	1	1	1	1	1	1	1	1	1	1	1	1	1	1	1	1	0	1	0	1	1	1	1	1	1	1	1	1	1	1	1	1	1	1	1	1	1	1	1	1
BC047536.1	IOH27737	sciellin (SCEL)	13552.1	0.929825	53	0	1	1	1	1	1	1	1	1	1	1	1	1	1	1	1	0	1	1	1	0	1	0	1	1	1	1	1	1	1	1	1	1	1	1	1	1	1	1	1	1	1	1	1
NM_138565.1	IOH6227	cortactin (CTTN), transcript variant 2	13369.5	0.859649	49	0	0	1	1	1	1	1	1	1	0	1	0	1	1	1	1	0	1	1	0	0	1	0	1	1	1	1	1	1	1	1	1	1	1	1	1	1	1	1	1	1	1	1	1
NM_003975.1	IOH13203	SH2 domain protein 2A (SH2D2A)	12018.7	0.894737	51	0	0	1	1	1	1	1	1	1	1	1	1	1	1	1	1	0	1	1	0	0	1	0	1	1	1	1	1	1	1	1	1	1	1	1	1	1	1	1	1	1	1	1	1
BC016330.1	IOH14709	RAD51 associated protein 1 (RAD51AP1)	11897.1	0.859649	49	0	0	1	1	1	1	1	1	1	1	1	0	1	1	1	1	0	1	1	0	0	1	0	1	1	1	1	1	1	1	1	1	1	1	1	1	1	1	1	1	1	1	1	1
NM_032349.1	IOH6316	nudix (nucleoside diphosphate linked moiety X)-type motif 16-like 1 (NUDT16L1)	11693.3	0.859649	49	0	0	1	0	1	1	1	1	1	1	1	0	1	1	1	1	0	1	1	0	0	1	0	1	1	1	1	1	1	1	1	1	1	1	1	1	1	1	1	1	1	1	1	1
BC001419.1	IOH4071	mitochondrial trans-2-enoyl-CoA reductase (MECR)	11484	0.842105	48	0	0	1	0	1	1	1	1	1	1	1	0	1	1	1	1	0	1	1	0	0	1	0	1	1	1	1	1	1	1	1	1	1	1	1	1	1	0	1	1	1	1	1	1
NM_006790.1	IOH7249	myotilin (MYOT)	11473.9	0.877193	50	0	1	1	0	1	1	1	1	1	1	1	0	1	1	1	1	0	1	1	0	0	1	0	1	1	1	1	1	1	1	1	1	1	1	1	1	1	1	1	1	1	1	1	1
NM_002822.3	IOH40883	twinfilin, actin-binding protein, homolog 1 (Drosophila) (TWF1)	11438.1	0.894737	51	1	0	1	1	1	1	1	1	1	1	1	0	1	1	1	1	1	1	1	0	0	1	0	1	1	1	1	1	1	1	1	1	1	1	1	1	1	1	1	1	1	1	1	1
BC002448.2	IOH4300	actin binding LIM protein 1 (ABLIM1)	11328.5	0.859649	49	0	0	1	1	1	1	1	1	1	1	1	0	0	1	1	1	0	1	1	0	0	1	0	1	1	1	1	1	1	1	1	1	1	1	1	1	1	1	1	1	1	1	1	1
BC053656.1	IOH28981	EGF-like repeats and discoidin I-like domains 3 (EDIL3)	10655.8	0.912281	52	0	1	1	1	1	1	1	1	1	1	1	1	1	1	1	1	0	1	1	0	0	1	0	1	1	1	1	1	1	1	1	1	1	1	1	1	1	1	1	1	1	1	1	1
NM_002714.2	IOH39632	protein phosphatase 1, regulatory (inhibitor) subunit 10 (PPP1R10)	10562.6	0.789474	45	0	0	1	1	1	1	1	1	1	1	1	0	1	1	0	0	0	1	0	0	0	1	0	1	1	1	1	1	1	1	1	1	1	1	0	1	1	1	1	0	1	1	1	1
BC104469.1	IOH63631	Outer dense fiber protein 3-like protein 2	10549.8	0.894737	51	1	0	1	1	1	1	1	1	1	1	1	0	1	1	1	1	0	1	1	0	0	1	0	1	1	1	1	1	1	1	1	1	1	1	1	1	1	1	1	1	1	1	1	1
BC000468.1	IOH3618	ubiquitin-conjugating enzyme E2 variant 1 (UBE2V1)	10529.6	0.877193	50	0	1	1	1	1	1	1	1	1	1	1	0	1	1	1	1	0	1	1	0	0	1	0	1	1	1	1	1	1	1	1	1	1	1	1	1	1	1	1	1	1	1	1	1
NM_145010.1	IOH10871	chromosome 10 open reading frame 63 (C10orf63)	10270.6	0.859649	49	0	0	1	1	1	1	1	1	1	1	1	0	1	1	1	1	1	1	1	0	1	1	0	1	1	1	1	1	0	1	1	1	0	1	1	1	1	1	1	1	1	1	1	1
BC022098.1	IOH14790	cDNA clone MGC:31944 IMAGE:4878869, complete cds	10185.2	0.894737	51	0	1	1	1	1	1	0	1	1	1	1	1	1	1	1	1	0	1	1	0	0	1	0	1	1	1	1	1	1	1	1	1	1	1	1	1	1	1	1	1	1	1	1	1
NM_017772.2	IOH42187	TBC1 domain family member 22B	10125.5	0.859649	49	0	0	1	0	1	1	1	1	1	1	1	0	1	1	1	1	0	1	1	1	0	1	0	0	1	1	1	1	1	1	1	1	1	1	1	1	1	1	1	1	1	1	1	1
BC104468.1	IOH63630	Outer dense fiber protein 3-like protein 2	9855.04	0.789474	45	1	0	1	1	1	1	1	0	1	1	1	0	1	1	1	1	0	1	1	0	0	1	0	1	1	1	1	0	1	0	1	1	0	1	1	1	1	1	0	1	1	1	1	1
BC034488.2	IOH22312	ATP-binding cassette, sub-family F (GCN20), member 1 (ABCF1)	9706.04	0.824561	47	0	0	1	1	1	1	1	1	1	1	0	1	1	1	1	1	0	1	1	0	0	0	0	1	1	1	1	1	1	1	1	1	0	0	1	1	1	1	1	1	1	1	1	1
NM_005522.3	IOH21992	homeobox A1 (HOXA1), transcript variant 1	9641.58	0.77193	44	0	0	0	0	0	1	1	1	1	1	1	0	1	1	1	0	0	1	1	0	0	0	0	1	1	1	1	1	1	1	1	0	1	1	1	1	1	1	1	1	1	1	1	1
BC017865.1	IOH13793	Fc fragment of IgG, low affinity IIIa, receptor (CD16a) (FCGR3A)	9462.43	0.859649	49	0	0	1	0	1	1	1	1	1	1	1	1	0	1	1	1	0	1	1	0	0	1	0	1	1	1	1	1	1	1	1	1	1	1	1	1	1	1	1	1	1	1	1	1
NM_133265.2	IOH38152	angiomotin (AMOT)	9037.75	0.859649	49	0	0	1	0	1	1	1	1	1	1	1	0	1	1	1	1	0	1	1	0	0	1	0	1	1	1	1	1	1	1	1	1	1	1	1	1	1	1	1	1	1	1	1	1
NM_001321.1	IOH1779	cysteine and glycine-rich protein 2 (CSRP2)	8893.37	0.842105	48	0	0	1	0	1	1	1	1	1	1	1	0	1	1	1	1	0	1	1	0	0	1	0	1	1	1	1	1	1	1	1	1	1	1	1	0	1	1	1	1	1	1	1	1
NM_005663.2	IOH46152	Wolf-Hirschhorn syndrome candidate 2 (WHSC2)	8867.95	0.894737	51	0	1	1	1	1	1	1	1	1	1	1	1	1	1	1	1	0	1	1	0	0	1	0	1	1	1	1	1	1	1	1	1	0	1	1	1	1	1	1	1	1	1	1	1
NM_152434.1	IOH42646	CWF19-like 2, cell cycle control (S. pombe) (CWF19L2)	8733.42	0.824561	47	0	0	1	0	1	1	1	1	1	1	1	0	1	1	1	1	0	1	1	0	0	1	0	1	1	1	1	0	1	1	1	1	1	1	1	1	1	1	1	1	1	1	1	1
NM_002625.1	IOH29862	6-phosphofructo-2-kinase/fructose-2,6-biphosphatase 1	8673.5	0.736842	42	0	1	0	0	0	0	1	1	0	1	0	0	1	1	1	1	1	1	1	0	0	1	0	1	1	1	1	0	1	0	1	1	0	1	1	1	1	1	1	1	1	1	1	0
BC092474.1	IOH62679	Proline-rich protein 16	8652.44	0.877193	50	0	0	1	1	1	1	1	1	1	1	1	0	1	1	1	1	0	1	1	0	0	1	0	1	1	1	1	1	1	1	1	1	1	1	1	1	1	1	1	1	1	1	1	1
NM_003093.1	IOH41465	small nuclear ribonucleoprotein polypeptide C (SNRPC)	8507.04	0.789474	45	0	0	1	0	1	1	1	1	1	1	1	1	1	1	1	1	0	0	1	0	0	1	0	1	1	1	0	0	1	1	1	1	1	1	1	1	1	1	1	0	1	1	1	1
BC029382.1	IOH23139	Angiogenic factor with G patch and FHA domains 1	8344.47	0.842105	48	0	0	1	0	1	1	1	1	1	1	1	0	1	1	1	1	0	1	1	0	0	1	0	1	1	1	1	1	1	1	1	1	1	1	1	1	1	1	1	1	1	1	1	1
BC005043.1	IOH6656	hypothetical protein MGC31957 (MGC31957)	8271.82	0.859649	49	0	0	1	0	1	1	1	1	1	1	1	0	1	1	1	1	0	1	1	0	0	1	0	1	1	1	1	1	1	1	1	1	1	1	1	1	1	1	1	1	1	1	1	1
NM_012472.1	IOH26570	leucine rich repeat containing 6 (LRRC6)	8256.89	0.789474	45	0	1	1	0	1	1	0	1	1	1	1	0	1	1	1	0	0	1	1	0	0	1	0	1	1	1	1	1	1	1	1	1	0	1	1	1	1	0	1	1	1	1	1	1
BC002914.1	IOH5733	WAS/WASL-interacting protein family member 1	8147.29	0.859649	49	0	0	1	0	1	1	1	1	1	1	1	0	1	1	1	1	0	1	1	0	0	1	0	1	1	1	1	1	1	1	1	1	1	1	1	1	1	1	1	1	1	1	1	1
BC031691.2	IOH28682	SLAIN motif family, member 2 (SLAIN2)	8098.89	0.877193	50	0	0	1	1	1	1	1	1	1	1	1	0	1	1	1	1	0	1	1	0	0	1	0	1	1	1	1	1	1	1	1	1	1	1	1	1	1	1	1	1	1	1	1	1
NM_014925.2	IOH42727	R3H domain-containing protein 2	8066.86	0.754386	43	0	1	1	0	1	1	1	0	1	0	1	0	0	1	1	0	0	1	1	0	0	1	0	1	1	1	1	1	1	1	1	1	1	1	1	1	1	1	1	1	1	1	1	1
BC005332.1	IOH7177	cDNA clone MGC:12418 IMAGE:3934658, complete cds	8022.6	0.859649	49	0	0	1	0	1	1	1	1	1	1	1	0	1	1	1	1	0	1	1	0	0	1	0	1	1	1	1	1	1	1	1	1	1	1	1	1	1	1	1	1	1	1	1	1
NM_020317.2	IOH4823	chromosome 1 open reading frame 63 (C1orf63)	7931.16	0.894737	51	0	1	1	0	1	1	1	0	1	1	1	1	1	1	1	1	1	1	1	0	0	1	0	1	1	1	1	1	1	1	1	1	1	1	1	1	1	1	1	1	1	1	1	1
NM_015122.1	IOH26137	FCH domain only 1 (FCHO1)	7929.11	0.824561	47	0	0	1	0	1	1	1	1	1	1	1	1	1	1	1	0	0	1	1	0	0	1	0	1	1	1	1	1	1	1	1	1	0	1	1	1	1	1	1	1	1	1	1	1
NM_005884.2	IOH2475	p21(CDKN1A)-activated kinase 4 (PAK4), transcript variant 1	7921.42	0.842105	48	0	0	1	0	1	1	1	1	1	1	1	1	1	1	1	1	0	1	1	1	0	1	0	1	1	1	1	0	1	1	1	1	1	0	1	1	1	1	1	1	1	1	1	1
NM_201998.1	IOH56887	Splicing factor 1	7857.89	0.859649	49	0	0	1	1	1	1	1	1	1	1	1	0	1	1	1	1	0	1	1	0	0	1	0	1	1	1	1	1	1	1	1	1	1	1	1	1	1	1	0	1	1	1	1	1
NM_032017.1	IOH40615	serine/threonine kinase 40 (STK40)	7798.15	0.824561	47	0	0	0	0	1	1	1	1	0	1	1	0	1	1	1	1	0	1	1	0	0	1	0	1	1	1	1	1	1	1	1	1	1	1	1	1	1	1	1	1	1	1	1	1
NM_012289.2	IOH5732	Kelch-like ECH-associated protein 1	7694.18	0.807018	46	0	0	0	0	1	1	1	0	0	1	1	0	1	1	1	1	0	1	1	0	0	1	0	1	1	1	1	1	1	1	1	1	1	1	1	1	1	1	1	1	1	1	1	1
BC011454.1	IOH9647	angiomotin like 2 (AMOTL2)	7668.25	0.842105	48	0	1	1	0	1	1	1	1	1	1	1	0	1	1	1	1	0	1	1	0	0	1	0	1	1	1	1	1	1	1	1	1	1	1	1	1	1	1	1	1	1	1	1	1
NM_152243.1	IOH42102	Cdc42 effector protein 1	7514.95	0.859649	49	0	0	1	0	1	1	1	1	1	1	0	1	1	1	1	1	0	1	1	0	0	1	0	1	1	1	1	1	1	1	1	1	1	1	1	1	1	1	1	1	1	1	1	1
NM_152376.2	IOH26515	UBX domain containing 3 (UBXD3)	7417.15	0.719298	41	0	1	1	0	1	1	1	1	1	1	1	0	1	1	0	0	0	0	0	0	0	1	0	1	1	1	1	0	1	1	1	1	1	0	0	1	1	0	1	1	1	1	1	1
BC020555.1	IOH10305	SERPINE1 mRNA binding protein 1 (SERBP1)	7408.29	0.877193	50	0	0	1	1	1	1	1	1	1	1	1	1	1	1	1	1	0	1	1	0	0	1	0	1	1	1	1	1	1	1	1	1	1	1	1	1	1	0	1	1	1	1	1	1
NM_001312.2	IOH3437	cysteine-rich protein 2 (CRIP2)	7404.62	0.842105	48	0	0	1	0	1	1	1	1	1	1	0	0	1	1	1	1	0	1	1	0	0	1	0	1	1	1	1	1	1	1	1	1	1	1	1	1	1	1	1	1	1	1	1	1
NM_024316.1	IOH12150	leukocyte receptor cluster (LRC) member 1 (LENG1)	7393.61	0.859649	49	0	0	1	1	1	1	1	1	1	1	1	0	1	1	1	1	0	0	1	0	0	1	0	1	1	1	1	1	1	1	1	1	1	1	1	1	1	1	1	1	1	1	1	1
BC033308.1	IOH26796	DAZ interacting protein 1-like (DZIP1L)	7385.57	0.754386	43	0	0	1	0	1	1	1	0	1	1	1	0	1	1	1	1	0	1	1	0	0	0	0	1	0	1	1	1	1	1	1	1	0	0	1	1	1	0	1	1	1	1	1	1
NM_023938.4	IOH3759	Specifically androgen-regulated gene protein	7350.86	0.859649	49	0	0	1	1	1	1	1	1	1	1	1	0	1	1	0	1	0	1	1	0	0	1	0	1	1	1	1	1	1	1	1	1	1	1	1	1	1	1	1	1	1	1	1	1
NM_199190.1	IOH42760	La ribonucleoprotein domain family, member 4 (LARP4), transcript variant 3	7316.86	0.701754	40	0	0	1	0	1	1	1	1	1	1	0	1	1	0	1	0	0	1	1	0	0	1	0	1	1	0	1	0	1	1	1	1	1	1	0	1	0	0	1	1	1	1	0	0
NM_016848.2	IOH11138	SHC-transforming protein 3	7300.66	0.894737	51	0	0	1	1	1	1	1	1	1	1	1	0	1	1	1	1	0	1	1	0	1	1	0	1	1	1	1	1	1	1	1	1	1	1	1	1	1	1	1	1	1	1	1	1
NM_001032293.1	IOH3584	zinc finger protein 207 (ZNF207), transcript variant 2	7256.4	0.789474	45	0	0	1	0	1	1	1	1	0	1	1	0	1	1	1	0	0	1	1	0	0	1	0	1	1	1	1	1	1	1	1	1	0	1	1	1	1	1	1	1	1	1	1	1
NM_032141.1	IOH43707	coiled-coil domain containing 55 (CCDC55), transcript variant 1	7198.27	0.807018	46	0	0	1	1	1	1	1	1	1	1	1	0	1	1	1	1	0	1	1	0	0	1	0	1	1	1	1	1	1	1	1	1	1	1	1	1	1	0	1	1	1	0	1	1
NM_172159.2	IOH25842	potassium voltage-gated channel, shaker-related subfamily, beta member 1 (KCNAB1), transcript variant 3	7069.2	0.824561	47	0	0	1	0	1	1	1	1	0	1	1	0	1	1	1	1	0	1	1	0	0	1	0	1	0	1	1	1	1	1	1	1	1	1	1	1	1	1	1	1	1	1	1	1
NM_005898.4	IOH46168	cell cycle associated protein 1 (CAPRIN1), transcript variant 1	6997.26	0.789474	45	0	0	1	0	1	1	1	1	1	1	1	1	1	1	1	1	0	1	1	0	0	0	0	1	1	1	1	0	1	1	1	1	1	1	0	1	0	1	1	1	0	1	1	1
NM_005558.2	IOH13864	ladinin 1 (LAD1)	6873.46	0.859649	49	0	1	1	0	1	1	1	1	1	1	1	0	1	1	1	1	1	1	1	0	0	1	0	1	1	1	1	0	1	1	1	1	1	1	1	1	1	1	1	1	1	1	1	1
NM_024038.2	IOH5926	chromosome 19 open reading frame 43 (C19orf43)	6834.54	0.77193	44	0	0	1	1	1	1	0	1	1	1	1	0	1	1	1	1	0	1	1	0	0	1	0	1	1	1	1	1	1	1	1	1	1	1	1	1	1	0	1	1	1	1	1	1
NM_004527.2	IOH40231	mesenchyme homeobox 1 (MEOX1), transcript variant 1	6784.78	0.824561	47	0	0	0	0	1	1	1	1	0	1	1	0	1	1	1	1	0	1	1	0	0	1	0	1	1	1	1	1	1	1	1	1	1	1	1	1	1	1	1	1	1	1	1	1
NM_178552.2	IOH27375	chromosome 22 open reading frame 33 (C22orf33)	6747.63	0.824561	47	0	0	1	1	1	1	1	1	1	1	1	0	1	1	1	1	0	1	1	0	0	1	0	1	1	1	1	1	1	1	1	1	1	1	1	1	1	1	1	1	1	1	1	1
NM_012321.1	IOH3488	LSM4 homolog, U6 small nuclear RNA associated (S. cerevisiae) (LSM4)	6741.95	0.807018	46	0	0	1	0	1	1	1	0	1	1	1	0	1	1	1	1	0	1	1	0	0	1	0	1	1	1	1	0	1	1	1	1	1	0	1	1	1	1	1	1	1	1	1	1
PV4202		NIMA (never in mitosis gene a)-related kinase 1 (NEK1)	6677.68	0.859649	49	0	0	1	0	1	1	1	1	1	1	1	0	1	1	1	1	0	1	1	0	0	1	0	1	1	1	1	1	1	1	1	1	1	1	1	1	1	1	1	1	1	1	1	1
BC030592.2	IOH22341	HIV-1 Rev binding protein (HRB)	6657.08	0.649123	37	0	0	1	0	1	1	1	0	1	1	0	0	1	1	0	1	0	1	1	0	0	1	0	0	1	1	1	0	1	0	0	1	1	0	1	1	1	1	0	1	1	1	1	0
NM_006479.2	IOH7384	RAD51 associated protein 1 (RAD51AP1)	6627.68	0.842105	48	0	0	1	1	1	1	1	1	1	1	1	0	1	1	1	1	0	1	1	0	0	1	0	1	1	1	1	1	1	1	1	1	1	1	1	1	1	0	1	1	1	1	1	1
BC032852.2	IOH27153	melanoma antigen family B, 4 (MAGEB4)	6575.4	0.789474	45	0	0	0	0	1	1	1	1	0	1	1	1	1	1	1	0	0	1	1	0	0	1	0	1	1	1	1	1	1	1	1	1	1	0	1	1	1	1	1	1	1	1	1	1
NM_018553.1	IOH44546	Uncharacterized protein C17orf85	6562.64	0.754386	43	0	0	1	0	1	1	1	1	0	1	1	0	1	1	1	0	0	1	0	0	0	1	0	1	1	1	1	0	1	1	1	0	1	1	1	1	1	1	1	1	1	1	1	1
NM_172160.1	IOH35727	potassium voltage-gated channel, shaker-related subfamily, beta member 1 (KCNAB1), transcript variant 1	6510.58	0.824561	47	0	0	1	0	1	1	1	0	1	1	1	0	1	1	1	1	0	1	1	0	0	1	0	1	1	1	1	1	1	1	1	1	1	1	1	1	1	1	1	1	1	1	1	1
NM_032943.2	IOH38478	synaptotagmin-like 2 (SYTL2), transcript variant a	6475.75	0.736842	42	0	0	0	0	1	1	1	1	1	1	0	0	1	1	1	0	0	1	0	0	0	1	0	1	0	1	1	0	1	1	1	1	1	1	1	1	1	0	1	1	1	1	1	1
BC017202.2	IOH57138	Isovaleryl-CoA dehydrogenase, mitochondrial	6418.93	0.701754	40	0	0	0	0	0	1	0	0	0	0	0	0	1	1	1	0	0	1	1	0	0	1	0	0	1	1	1	1	1	1	1	1	1	1	1	1	1	1	1	1	1	1	1	1
NM_018441.2	IOH4050	peroxisomal trans-2-enoyl-CoA reductase (PECR)	6385.3	0.859649	49	0	0	1	0	1	1	1	1	1	1	1	0	1	1	1	1	0	1	1	0	0	1	0	1	1	1	1	1	1	1	1	1	1	1	1	1	1	1	1	1	1	1	1	1
BC042999.2	IOH25869	Putative Polycomb group protein ASXL2	6380.17	0.684211	39	0	0	1	0	0	0	1	1	1	1	1	0	1	1	1	1	0	0	1	0	0	1	0	1	0	1	1	0	1	1	1	1	1	0	1	0	1	1	1	0	1	1	1	1
BC012289.1	IOH11447	KIAA0515 (KIAA0515)	6330.89	0.789474	45	0	0	1	0	1	1	1	1	1	1	1	0	1	1	1	0	0	1	1	0	0	1	0	1	1	1	1	1	1	1	1	1	1	0	1	1	1	1	1	1	1	1	1	1
NM_014943.3	IOH28064	zinc fingers and homeoboxes 2 (ZHX2)	6138.69	0.789474	45	0	0	1	0	1	1	1	1	1	1	0	1	1	1	1	1	0	1	0	0	0	1	0	0	1	1	1	0	1	1	1	1	0	1	1	1	1	1	1	1	1	1	1	1
NM_004281.2	IOH6609	BCL2-associated athanogene 3 (BAG3)	6078.79	0.789474	45	1	0	1	0	1	1	1	0	1	1	1	0	1	1	1	0	0	1	0	0	0	1	0	1	1	1	1	1	1	1	1	1	1	1	1	1	1	1	1	1	1	1	1	1
BC002488.1	IOH3970	SERPINE1 mRNA binding protein 1 (SERBP1)	6017.85	0.807018	46	0	0	1	1	1	1	1	1	1	1	1	0	1	1	1	1	0	1	1	0	0	1	0	1	1	1	1	1	1	1	1	1	1	1	1	0	1	0	1	1	1	1	0	1
NM_144659.1	IOH21795	t-complex 10 (mouse)-like (TCP10L)	6011.04	0.842105	48	0	1	1	1	1	1	1	1	1	1	1	0	1	1	1	1	0	1	1	0	0	1	0	1	1	1	1	0	1	1	1	1	1	1	1	1	1	0	1	1	1	1	1	1
NM_198513.1	IOH11823	PHD finger protein 20-like 1 (PHF20L1), transcript variant 3	6005.23	0.807018	46	0	0	1	1	1	1	1	1	1	1	1	0	1	1	0	1	0	1	1	0	0	1	0	1	1	1	1	0	1	1	1	1	1	1	1	1	1	1	1	1	1	1	1	1
BC014020.1	IOH13375	BAI1-associated protein 2 (BAIAP2)	5918.09	0.859649	49	0	0	1	1	1	1	1	1	1	1	1	0	1	1	1	1	0	1	1	0	0	1	0	1	1	1	1	0	1	1	1	1	1	1	1	1	1	1	1	1	1	1	1	1
NM_007177.1	IOH10203	Protein FAM107A	5861.25	0.736842	42	0	0	0	0	1	1	1	1	0	1	0	0	1	1	1	1	0	1	0	0	0	1	0	1	1	1	1	0	1	1	1	1	1	0	1	1	1	1	1	1	1	1	1	1
BC064840.1	IOH40500	Histone deacetylase 7	5849.54	0.807018	46	0	0	1	1	1	1	1	1	1	1	0	0	1	1	1	0	0	1	1	0	0	1	0	1	1	1	1	1	1	1	1	1	1	1	1	1	1	0	1	1	1	1	1	1
NM_152377.1	IOH11555	chromosome 1 open reading frame 87 (C1orf87)	5836.25	0.842105	48	0	0	1	1	1	1	1	1	1	1	1	0	1	1	1	1	0	1	1	0	0	1	0	1	1	1	1	1	1	1	1	1	1	1	0	1	1	1	1	1	1	1	1	1
BC001304.1	IOH45994	piccolo (presynaptic cytomatrix protein) (PCLO)	5823.77	0.77193	44	0	0	1	1	1	1	1	1	1	1	1	0	1	1	1	1	1	1	1	0	0	1	0	1	0	1	1	0	1	1	1	1	1	0	1	1	1	0	1	1	1	1	1	1
NM_006640.2	IOH12164	septin 9 (SEPT9)	5796.08	0.631579	36	1	0	1	1	1	0	1	1	1	1	1	0	1	1	0	1	0	1	1	0	0	1	0	1	0	1	0	0	0	0	0	1	1	0	0	0	1	1	0	1	1	1	1	1
NM_006449.2	IOH12552	CDC42 effector protein (Rho GTPase binding) 3 (CDC42EP3)	5759.89	0.842105	48	0	0	1	1	1	1	1	1	1	1	1	1	1	1	1	0	0	1	0	0	0	1	0	1	1	1	1	1	1	1	1	1	1	1	1	1	1	1	1	1	1	1	1	1
BC072461.1	IOH62565	Cysteine and histidine-rich domain-containing protein 1	5754.46	0.789474	45	0	0	1	0	1	1	1	1	1	1	1	0	1	1	1	1	0	1	1	0	0	1	0	1	1	1	0	1	1	1	1	1	0	1	1	1	1	0	1	1	1	1	1	1
BC013437.1	IOH9908	myocyte enhancer factor 2A (MEF2A)	5725.96	0.736842	42	0	1	1	0	1	1	1	0	1	1	1	1	1	1	0	0	0	1	0	0	0	1	0	0	1	1	1	0	1	1	1	1	1	1	1	1	1	1	1	1	1	1	1	0
NM_006651.2	IOH4343	complexin 1 (CPLX1)	5669.07	0.666667	38	0	1	1	1	1	1	1	1	0	1	1	0	1	1	1	1	0	1	1	0	0	0	0	1	1	1	1	0	1	1	1	0	0	1	0	0	0	0	1	0	0	1	1	1
NM_003177.3	IOH4914	spleen tyrosine kinase (SYK)	5664.39	0.807018	46	0	0	1	0	1	1	1	0	1	0	1	0	1	1	1	0	0	1	1	0	0	1	0	1	1	1	1	1	1	1	1	1	1	1	1	1	1	1	1	1	1	1	1	1
NM_173060.1	IOH52621	Calpastatin	5661.27	0.719298	41	0	0	1	0	0	1	1	1	1	1	1	1	1	1	1	1	0	1	1	0	0	1	0	1	0	1	1	1	1	1	0	0	1	1	1	1	1	0	1	1	1	1	0	0
BC009894.2	IOH14557	3'-phosphoadenosine 5'-phosphosulfate synthase 2 (PAPSS2)	5618.42	0.842105	48	0	0	1	0	1	1	1	1	1	1	1	0	1	1	1	1	0	1	1	0	0	1	0	1	1	1	1	1	1	1	1	1	0	1	1	1	1	1	1	1	1	1	1	1
NM_016203.2	IOH42382	protein kinase, AMP-activated, gamma 2 non-catalytic subunit (PRKAG2), transcript variant a, mRNA.	5618.32	0.842105	48	0	0	1	0	1	1	1	1	1	0	1	0	1	1	1	1	0	1	1	0	0	1	0	1	1	1	1	1	1	1	1	1	1	1	1	1	1	1	1	1	1	1	1	1
NM_016520.1	IOH5899	chromosome 9 open reading frame 78 (C9orf78)	5522.57	0.754386	43	0	0	0	1	1	1	1	1	0	1	1	0	1	1	1	1	0	1	1	0	0	1	0	1	1	1	1	0	0	1	1	1	1	1	1	0	1	0	1	1	1	1	1	1
BC015665.2	IOH40642	LATS, large tumor suppressor, homolog 1 (Drosophila) (LATS1)	5522.56	0.824561	47	0	0	1	1	1	1	1	1	1	1	1	0	1	1	1	0	0	1	1	0	0	1	0	1	1	1	1	1	1	1	1	1	1	0	1	1	1	1	1	1	1	1	1	1
BC026039.1	IOH40656	mitochondrial GTPase 1 homolog (S. cerevisiae) (MTG1)	5511.68	0.789474	45	0	0	0	0	1	1	1	1	0	1	1	0	1	1	1	0	0	0	1	0	0	1	0	1	1	1	1	1	1	1	1	1	1	1	1	1	1	1	1	1	1	1	1	1
PV3359		Ephrin receptor A3 (EPHA3), transcript variant 1	5502.82	0.859649	49	0	0	1	1	1	1	1	1	1	1	1	0	1	1	1	0	0	1	1	0	0	1	0	1	1	1	1	1	1	1	1	1	1	1	1	1	1	1	1	1	1	1	1	1
BC048299.1	IOH26615	spermatogenesis associated, serine-rich 2 (SPATS2)	5476.93	0.807018	46	0	0	0	0	1	1	1	1	1	1	1	0	1	1	0	1	0	1	1	0	0	1	0	1	1	1	1	1	1	1	1	1	1	1	1	1	1	1	1	1	1	1	1	1
NM_004732.1	IOH29581	potassium voltage-gated channel, shaker-related subfamily, beta member 3 (KCNAB3)	5454.24	0.807018	46	0	0	1	0	1	1	1	1	0	1	1	0	1	1	1	0	0	1	1	0	0	1	0	1	1	1	1	1	1	1	1	1	1	1	1	1	1	0	1	1	1	1	1	1
NM_014763.2	IOH23003	mitochondrial ribosomal protein L19 (MRPL19), nuclear gene encoding mitochondrial protein	5431.92	0.859649	49	0	0	1	0	1	1	1	1	1	1	1	0	1	1	1	1	0	1	1	0	0	1	0	1	1	1	1	1	1	1	1	1	1	1	1	1	1	1	1	1	1	1	1	1
BC002733.2	IOH5365	chromosome 1 open reading frame 77 (C1orf77)	5427.77	0.824561	47	0	0	1	0	1	1	1	1	1	1	1	1	1	1	1	1	0	1	1	0	0	1	0	1	1	1	1	1	1	1	0	1	1	1	1	1	1	1	1	1	1	1	1	1
BC000442.1		Serine/threonine-protein kinase 12	5418.74	0.807018	46	0	0	1	0	1	1	1	0	0	1	1	0	1	1	0	1	0	1	1	0	0	1	0	1	1	1	1	1	1	1	1	1	1	1	1	1	1	1	1	1	1	1	1	1
BC015505.1	IOH9981	DEAD (Asp-Glu-Ala-Asp) box polypeptide 42 (DDX42)	5395	0.754386	43	0	0	1	0	1	1	1	1	1	1	1	0	1	1	1	0	0	1	1	0	0	1	0	1	1	1	1	0	1	1	1	1	1	0	1	1	0	1	1	1	1	0	1	1
BC009055.1	IOH3376	Protein FAM184A	5369.62	0.807018	46	0	0	1	1	1	1	1	1	1	1	0	0	1	1	1	1	0	1	1	0	0	1	0	1	0	1	1	1	1	1	1	1	1	1	1	1	1	0	1	1	1	1	1	1
NM_176791.2	IOH26363	family with sequence similarity 112, member A (FAM112A), transcript variant 1	5211.98	0.77193	44	0	0	1	0	1	1	1	1	1	1	1	0	1	1	1	1	0	1	1	0	0	1	0	1	1	1	0	0	1	1	0	1	1	1	1	1	1	1	1	1	0	1	1	1
NM_198467.1	IOH40427	round spermatid basic protein 1-like (RSBN1L)	5188.24	0.701754	40	0	0	1	0	1	1	1	0	1	0	0	0	1	1	1	0	0	1	0	0	0	1	0	1	1	1	1	0	1	1	1	1	1	0	1	1	1	0	1	1	1	1	1	1
BC042608.1	IOH27462	family with sequence similarity 90, member A1 (FAM90A1)	5185.68	0.842105	48	0	0	1	0	1	1	1	1	1	1	1	0	1	1	1	1	0	1	1	0	0	1	0	1	1	1	1	1	1	1	1	1	1	1	1	1	1	1	1	1	1	1	1	1
NM_003130.1	IOH13042	sorcin (SRI), transcript variant 1	5158.38	0.684211	39	0	1	1	0	1	1	1	1	1	1	1	0	1	1	1	1	0	1	1	0	0	1	0	1	1	1	0	0	1	0	0	1	1	1	1	1	1	0	1	1	1	1	1	0
BC080187.1	IOH62553	Leiomodin-1	5132.46	0.736842	42	0	0	1	0	1	1	1	1	1	1	0	0	1	1	1	0	0	1	1	0	0	1	0	1	1	1	0	0	1	1	1	1	1	1	1	1	1	1	1	1	1	1	1	1
BC098117.1	IOH63340	CaiB/baiF CoA-transferase family protein C7orf10	5091.15	0.649123	37	0	0	0	0	1	1	0	0	0	1	0	0	0	0	0	0	0	0	0	0	0	1	0	0	1	1	1	1	1	1	1	1	1	1	1	1	1	1	1	1	1	1	1	1
NM_199188.1	IOH38224	La ribonucleoprotein domain family, member 4 (LARP4), transcript variant 2	5090.91	0.789474	45	0	0	1	0	0	1	1	1	1	1	0	1	1	1	1	0	0	1	1	0	0	1	0	1	1	1	1	0	1	1	1	1	0	1	1	1	1	1	1	1	1	1	1	1
NM_001030002.1	IOH55430	Growth factor receptor-bound protein 7	5088.41	0.807018	46	0	0	1	0	1	1	1	1	0	1	1	0	1	1	1	0	0	1	1	0	0	1	0	1	1	1	1	1	1	1	1	1	1	1	1	1	1	1	1	1	1	1	1	1
BC001755.1	IOH4451	Leiomodin-1	5072.05	0.754386	43	0	0	1	0	1	1	1	1	1	1	1	0	1	1	1	0	0	1	1	0	0	1	0	1	1	1	0	1	1	1	1	1	1	1	1	0	1	1	1	0	1	1	0	1
BC026101.2	IOH10652	nudE nuclear distribution gene E homolog (A. nidulans)-like 1 (NDEL1)	5060.8	0.754386	43	0	0	0	0	1	1	1	1	0	1	0	0	1	1	1	1	0	1	1	0	0	1	0	1	1	1	0	0	1	1	1	1	1	0	1	1	1	1	1	1	1	1	1	1
BC012109.1	IOH12380	homer homolog 2 (Drosophila) (HOMER2)	5054.57	0.824561	47	0	0	1	0	1	1	1	1	0	1	1	0	1	1	1	1	0	1	1	0	0	1	0	1	1	1	1	0	1	1	1	1	1	1	1	1	1	1	1	1	1	1	1	1
NM_006591.1	IOH41599	polymerase (DNA-directed), delta 3, accessory subunit (POLD3)	5045.04	0.807018	46	0	0	1	1	1	1	1	1	1	1	0	0	1	1	1	0	0	1	1	0	0	1	0	1	1	1	1	0	1	1	1	1	1	1	1	1	1	1	1	1	1	1	1	1
NM_152763.2	IOH22315	chromosome 1 open reading frame 62 (C1orf62)	5039.41	0.824561	47	0	0	1	1	1	1	1	1	1	1	1	0	1	1	1	0	0	1	1	1	0	1	0	1	1	1	1	1	1	1	1	1	0	1	1	1	1	1	1	1	1	1	1	1
[truncated: 355 more columns]

## Sheet: Supplemental Table 1D 
Database ID	Ultimate ORF ID	Description	Average RFU	Standard Deviation RFU
BC015505.1	IOH9981	DEAD (Asp-Glu-Ala-Asp) box polypeptide 42 (DDX42)	5855.7	5538.7
BC067755.1	IOH40120	potassium channel tetramerisation domain containing 18 (KCTD18)	6228.1	7604.5
NM_016203.2	IOH42382	protein kinase, AMP-activated, gamma 2 non-catalytic subunit (PRKAG2), transcript variant a, mRNA.	6246.5	6180.9
NM_152377.1	IOH11555	chromosome 1 open reading frame 87 (C1orf87)	6320.5	7477.7
NM_152376.2	IOH26515	UBX domain containing 3 (UBXD3)	6394	7877.6
BC000442.1	N/A	Serine/threonine-protein kinase 12	6517.4	7326.2
NM_016520.1	IOH5899	chromosome 9 open reading frame 78 (C9orf78)	6739	8062.7
NM_014943.3	IOH28064	zinc fingers and homeoboxes 2 (ZHX2)	7056.8	8735.2
NM_001032293.1	IOH3584	zinc finger protein 207 (ZNF207), transcript variant 2	7163.6	5994.9
NM_199190.1	IOH42760	La ribonucleoprotein domain family, member 4 (LARP4), transcript variant 3	7207.5	9188.7
BC011454.1	IOH9647	angiomotin like 2 (AMOTL2)	7239.3	5860.1
PV4202	N/A	NIMA (never in mitosis gene a)-related kinase 1 (NEK1)	7253.5	5767.1
BC002914.1	IOH5733	WAS/WASL-interacting protein family member 1	7458.5	6970
NM_006479.2	IOH7384	RAD51 associated protein 1 (RAD51AP1)	7696.1	8059.7
BC005332.1	IOH7177	cDNA clone MGC:12418 IMAGE:3934658, complete cds	7904.9	1490
BC031691.2	IOH28682	SLAIN motif family, member 2 (SLAIN2)	7956	8528.1
BC092474.1	IOH62679	Proline-rich protein 16	7958.5	10155.5
BC029382.1	IOH23139	Angiogenic factor with G patch and FHA domains 1	8028.9	8168.9
NM_172159.2	IOH25842	potassium voltage-gated channel, shaker-related subfamily, beta member 1 (KCNAB1), transcript variant 3	8088.8	4405.7
NM_032943.2	IOH38478	synaptotagmin-like 2 (SYTL2), transcript variant a	8279.3	9384.4
NM_005663.2	IOH46152	Wolf-Hirschhorn syndrome candidate 2 (WHSC2)	8331	8391.7
BC034488.2	IOH22312	ATP-binding cassette, sub-family F (GCN20), member 1 (ABCF1)	8382.3	10055.8
NM_016848.2	IOH11138	SHC-transforming protein 3	8534	11673.9
NM_023938.4	IOH3759	Specifically androgen-regulated gene protein	8917.9	11003.3
NM_024316.1	IOH12150	leukocyte receptor cluster (LRC) member 1 (LENG1)	9015.9	9093.4
NM_145010.1	IOH10871	chromosome 10 open reading frame 63 (C10orf63)	9016.6	9646.1
NM_133265.2	IOH38152	angiomotin (AMOT)	9205	8985.8
NM_001321.1	IOH1779	cysteine and glycine-rich protein 2 (CSRP2)	9472.6	8181.4
BC104468.1	IOH63630	Outer dense fiber protein 3-like protein 2	9501.1	14445
NM_020317.2	IOH4823	chromosome 1 open reading frame 63 (C1orf63)	9506.1	9910.4
BC017865.1	IOH13793	Fc fragment of IgG, low affinity IIIa, receptor (CD16a) (FCGR3A)	9533.8	3682.4
BC005043.1	IOH6656	hypothetical protein MGC31957 (MGC31957)	9545.3	7287.6
BC002448.2	IOH4300	actin binding LIM protein 1 (ABLIM1)	10192.2	6980.6
NM_002714.2	IOH39632	protein phosphatase 1, regulatory (inhibitor) subunit 10 (PPP1R10)	10818.9	10365.2
BC000468.1	IOH3618	ubiquitin-conjugating enzyme E2 variant 1 (UBE2V1)	11219.7	6000.9
NM_002822.3	IOH40883	twinfilin, actin-binding protein, homolog 1 (Drosophila) (TWF1)	11242.5	8573.7
BC104469.1	IOH63631	Outer dense fiber protein 3-like protein 2	11435	14449.6
BC016330.1	IOH14709	RAD51 associated protein 1 (RAD51AP1)	11586.1	10844.4
BC022098.1	IOH14790	cDNA clone MGC:31944 IMAGE:4878869, complete cds	11640.4	2776.8
NM_017772.2	IOH42187	TBC1 domain family member 22B	11658.8	12221.1
BC053656.1	IOH28981	EGF-like repeats and discoidin I-like domains 3 (EDIL3)	12125.7	1799.9
BC025700.1	IOH11281	AF4/FMR2 family, member 4 (AFF4)	13003.1	9888.2
NM_003975.1	IOH13203	SH2 domain protein 2A (SH2D2A)	13396.6	13459
BC047536.1	IOH27737	sciellin (SCEL)	13748.1	8429.4
NM_138565.1	IOH6227	cortactin (CTTN), transcript variant 2	13966.6	11733.4
NM_006790.1	IOH7249	myotilin (MYOT)	14394.7	9487.5
BC026346.1	IOH10816	family with sequence similarity 84, member A (FAM84A)	14410.4	9994.3
NM_032855.1	IOH14623	hematopoietic SH2 domain containing (HSH2D)	14415.4	4175.4
BC031650.1	IOH22742	Putative E3 ubiquitin-protein ligase SH3RF2	15875.1	9826.2
NM_004987.3	IOH55033	LIM and senescent cell antigen-like-containing domain protein 1	16200	8418.7
NM_012325.1	IOH41294	microtubule-associated protein, RP/EB family, member 1 (MAPRE1)	16581.9	12443.3
NM_002945.2	IOH11757	replication protein A1, 70kDa (RPA1)	17963.5	11271.3
BC099907.1	IOH62625	General transcription factor II-I	18013.8	10468.4
BC032451.1	IOH21663	cDNA clone MGC:40426 IMAGE:5178085, complete cds	19962.9	2654.3
BC018929.1	IOH22929	pleckstrin homology-like domain, family A, member 1 (PHLDA1)	21803.3	22258.4
BC022362.1	IOH14191	cDNA clone MGC:23888 IMAGE:4704496, complete cds	28301.5	7204
NM_203284.1	IOH39978	recombination signal binding protein for immunoglobulin kappa J region (RBPJ), transcript variant 4	28626.5	22181.5
NM_024692.3	IOH42634	CAP-GLY domain containing linker protein family, member 4 (CLIP4)	28629.2	20329.7
NM_014481.2	IOH4887	APEX nuclease (apurinic/apyrimidinic endonuclease) 2 (APEX2), nuclear gene encoding mitochondrial protein	36091.1	18849.2
BC030813.1	IOH23055	cDNA clone MGC:22645 IMAGE:4700961, complete cds	44382.4	8669.6
BC016380.1	IOH23077	cDNA clone MGC:27376 IMAGE:4688477, complete cds	50671	8211.2
BC020233.1	IOH14752	cDNA clone MGC:31936 IMAGE:4765518, complete cds	53539.2	11410.8
BC015833.1	IOH14840	cDNA clone MGC:27152 IMAGE:4691630, complete cds	56326.6	10088.4
BC030984.1	IOH23182	cDNA clone MGC:32654 IMAGE:4701898, complete cds	56361.6	10479.4
PHR5001	N/A	Recombinant human CTLA-4/Fc	59675.2	7989.9
NM_003141.2	IOH9948	tripartite motif-containing 21 (TRIM21)	63248.7	15048.8
